# Supplementary material
Source: bioRxiv or medRxiv preprint supplement (https://www.medrxiv.org/highwire/filestream/94436/field_highwire_adjunct_files/0/2020.08.24.20179085-1.pdf)

Figure\_S1

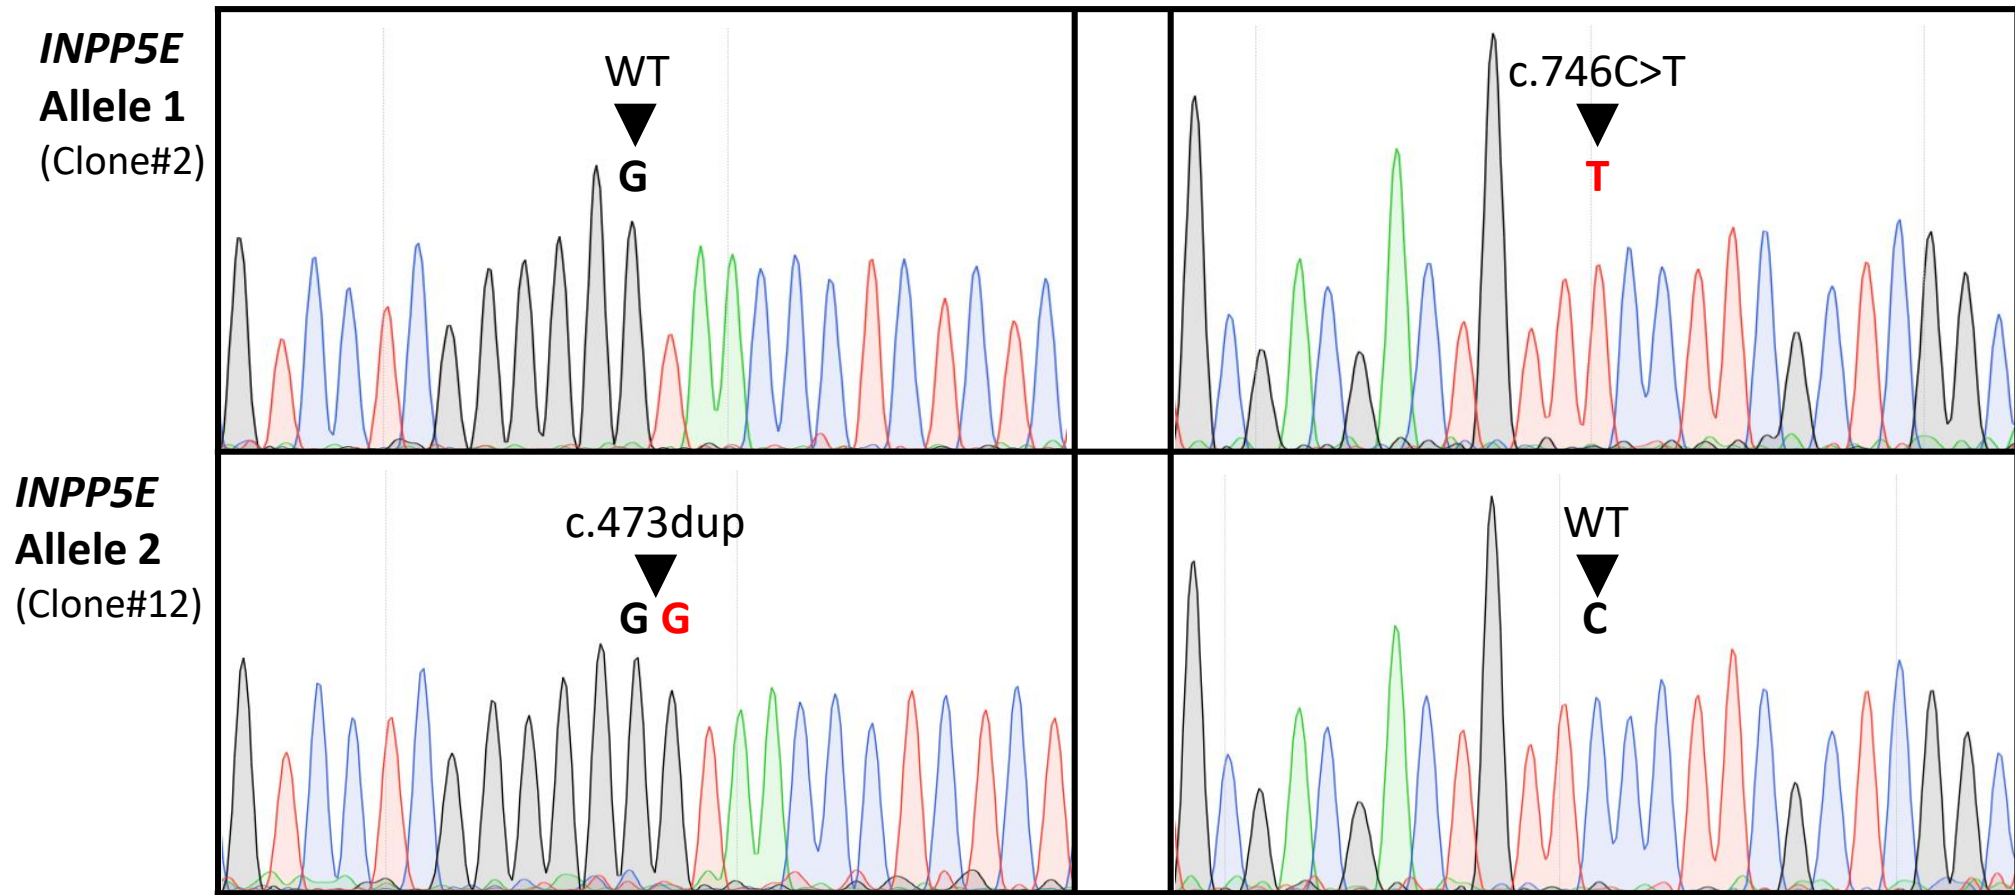

**Fig. S2 INPP5E protein alignment in 100 different species.** Evolutionarily conserved residues are indicated at the bottom of the alignment by using the symbols period (.), colon (:), and asterisk (\*), consistent with increasing conservation. Clustal Omega predicted domain (residues 297-599 of human INPP5E) is indicated by a dark green bar and it overlaps with the Pfam-predicted phosphatase domain (residues 304-584). However, due to the significant conservation of region encompassing residues 273-296 and 600-621, we redefined the length of the INPP5E functional domain and indicated it by a light green bar. Residues mutated in the IRD probands presented in this study are highlighted in bold red.

|                                            |                              |    |
|--------------------------------------------|------------------------------|----|
| INP5E_Homo_sapiens                         | -----MPSKAEN-----LRPSEPA---- | 14 |
| INP5E_Pan_troglodytes                      | -----MPSKAEN-----LRPSEPA---- | 14 |
| A0A2K5K2A0_Colobus_angolensis_palliatus    | -----MPSKAEN-----LRPSEPA---- | 14 |
| A0A2K6PY13_Rhinopithecus_roxellana         | -----MPSKAES-----LRPSEPA---- | 14 |
| H2PTZ0_Pongo_abelii                        | -----MPSKADN-----LRPSEPA---- | 14 |
| A0A2K6U2B2_Saimiri_boliviensis_boliviensis | -----MPSKAEN-----LRPSEPA---- | 14 |
| A0A2K6F2I5_Propithecus_coquereli           | -----MPSESV-----LRP-----     | 10 |
| A0A2K6KCW3_Rhinopithecus_bieti             | -----QTET-----LSP-----       | 7  |
| A0A2K5MDJ3_Cercocebus_atys                 | -----MPSKAES-----LRPSEPA---- | 14 |
| A0A2K5XR75_Mandrillus_leucophaeus          | -----MPSKAEN-----LRPSEPA---- | 14 |
| A0A0D9RTF7_Chlorocebus_sabaeus             | -----MPSKAES-----LRPSEPA---- | 14 |
| A0A096NRS4_Papio_anubis                    | -----MPSKAES-----LRPSEPA---- | 14 |
| A0A2K5U0T2_Macaca_fascicularis             | -----MPSKAES-----LRPSEPA---- | 14 |
| F7DRP8_Macaca_mulatta                      | -----MPSKAES-----LRPSEPA---- | 14 |
| A0A2K5PHS4_Cebus_capucinus_imitator        | -----MPSKAAS-----LRPPEPA---- | 14 |
| A0A2K5CN95_Aotus_nancymae                  | -----MPSKAAS-----LRPSEPA---- | 14 |
| A0A3Q0DNV4_Tarsius_syrichtha               | -----MPSKAEN-----LRPSEPA---- | 14 |
| HOXE73_Otolemur_garnettii                  | -----MPSESLC-----LRP-----    | 10 |
| I3N2L4_Ictidomys_tridecemlineatus          | -----MPTKATC-----MRHTE-A---- | 13 |
| F7BT66_Callithrix_jacchus                  | -----MPSKAAS-----LRPSEPA---- | 14 |
| A0A250Y3V1_Castor_canadensis               | -----MPSKSAC-----LRHTEA----  | 13 |
| A0A1S3G993Dipodomys_ordii                  | -----MPSKAEN-----LRPSEPA---- | 14 |
| HOVEZ3_Cavia_porcellus                     | -----MRSKAVC-----LRHTTAP---- | 14 |
| G5B6B1_Heterocephalus_glaber               | -----MPSKAVC-----LRHTAAP---- | 14 |
| A0A2Y9E841_Trichechus_manatus_latirostris  | -----MPSTSVS-----VPHAEGP---- | 14 |
| L5KA82_Pteropus_alecto                     | -----MPSKAEN-----LRPSEPA---- | 14 |
| A0A5N4EAQ5_Camelus_dromedarius             | -----MPSELAC-----VGHSEAA---- | 14 |
| A0A3Q2HCU7_Equus_caballus                  | -----MPSKPAC-----LGHSEAA---- | 14 |
| A0A1S2ZM74_Erinaceus_europaeus             | -----MPARLWS-----LGysePA---- | 14 |
| A0A3Q0DCZ7_Mesocricetus_auratus            | -----MPSKSAC-----LRHMEAP---- | 14 |
| G3I6Z4_Cricetulus_griseus                  | -----MPSKSAC-----LRHTEAP---- | 14 |
| INP5E_Rattus_norvegicus                    | -----MPSKSAC-----LRHTEAP---- | 14 |
| INP5E_Mus_musculus                         | -----MPSKSAC-----LRHTEAP---- | 14 |
| A0A2Y9NRK2_Delphinapterus_leucas           | -----MPSKAEN-----LRPSEPA---- | 14 |
| A0A2Y9SXS0_Physeter_macrocephalus          | -----MPSKAEN-----LRPSEPA---- | 14 |
| E1BAU6_Bos_taurus                          | -----MPSKLV-----LGHSETA----  | 14 |
| A0A4W2BWU9_Bos_indicus_x_Bos_taurus        | -----MPSKLV-----LGHSETA----  | 14 |
| L8IYW6_Bos_mutus                           | -----MPSKLV-----LGHSETT----  | 14 |
| A0A452DQV4_Capra_hircus                    | -----MPSKLV-----LGHSETA----  | 14 |
| A0A5J5MJZ6_Muntiacus_reevesi               | -----MPSKLV-----LGHSEAA----  | 14 |
| A0A5N3WU40_Muntiacus_muntjak               | -----MPSKLV-----LGHSEAA----  | 14 |
| A0A3Q7V225_Ursus_arctos_horribilis         | -----MPSKLVG-----LGHSEAS---- | 14 |
| A0A452Q8J6_Ursus_americanus                | -----MPSKLVG-----LGHSEAS---- | 14 |
| A0A452VEA9_Ursus_maritimus                 | -----MPSKLVG-----LGHSEAS---- | 14 |
| A0A2U3ZR12_Odobenus_rossmarus_divergens    | -----MPSKLVG-----LGHSEAS---- | 14 |
| A0A3Q7N7C7_Callorhinus_ursinus             | -----MPSKLVG-----LGHSEAS---- | 14 |
| A0A2Y9HBQ8_Neomonachus_schauinslandi       | -----MPSKLVG-----LGHSEAS---- | 14 |
| A0A485NC41_Lynx_pardinus                   | -----MPSKLAC-----LGHSEAS---- | 14 |
| A0A3Q7QUW1_Vulpes_vulpes                   | -----MPSKLVG-----LGHSEAS---- | 14 |
| F1PDA7_Canis_lupus_familiaris              | -----MPSKLVG-----LGHSEAS---- | 14 |
| A0A2Y9JFT0_Enhydra_lutris_kenyoni          | -----MPSRLAG-----VGRSGAS---- | 14 |
| M3YJ90_Mustela_putorius_furo               | -----MPSRLEG-----VGCsGAS---- | 14 |
| I3JX61_Oreochromis_niloticus               | -----MPSKLVG-----LGHSEAS---- | 14 |
| A0A3Q4H5I7_Neolamprologus_brichardi        | -----MPSKLVG-----LGHSEAS---- | 14 |
| A0A3B4FRA1_Pundamilia_nyererei             | -----MPSKLVG-----LGHSEAS---- | 14 |
| A0A3P8QQM7_Astatotilapia_calliptera        | -----MPSKLVG-----LGHSEAS---- | 14 |
| W5M6X5_Lepisosteus_oculatus                | -----MPSKLVG-----LGHSEAS---- | 14 |
| A0A3B3RRU9_Paramormyrops_kingsleyae        | -----MRMN-----               | 4  |
| A0A4W4HDW3_Electrophorus_electricus        | -----MPSKLVG-----LGHSEAS---- | 14 |
| A0A3Q3IZN0_Monopterus_albus                | -----MPSKLVG-----LGHSEAS---- | 14 |
| A0A3P8VEE4_Cynoglossus_semilaevis          | -----MPSKLVG-----LGHSEAS---- | 14 |
| A0A3Q1H6D9_Anabas_testudineus              | -----MPSKLVG-----LGHSEAS---- | 14 |
| A0A4W6CEK3_Lates_calcarifer                | -----MPSKLVG-----LGHSEAS---- | 14 |
| A0A3B4VK37_Seriola_dumerili                | -----MPSKLVG-----LGHSEAS---- | 14 |
| A0A3Q3GNS7_Labrus_bergylla                 | -----MPSKLVG-----LGHSEAS---- | 14 |

|                                         |                                                            |    |
|-----------------------------------------|------------------------------------------------------------|----|
| A0A3Q3RRU7_9TELE_Mastacembelus_armatus  | -----                                                      |    |
| A0A4U5UTG8_Collichthys_lucidus          | -----                                                      |    |
| A0A3B4ZI99_Stegastes_partitus           | -----                                                      |    |
| A0A3Q1H1R6_Acanthochromis_polyacanthus  | -----                                                      |    |
| A0A3Q1CXU7_Amphiprion_ocellaris         | -----                                                      |    |
| A0A3P8SMU2_Amphiprion_percula           | -----                                                      |    |
| A0A5J5DH05_Etheostoma_spectabile        | -----                                                      |    |
| A0A484DDW2_Perca_flavescens             | -----                                                      |    |
| A0A4Z2H351_Liparis_tanakae              | -----                                                      |    |
| W5UJ6_Ictalurus_punctatus               | -----                                                      |    |
| A0A5N5KDW8_Pangasianodon_hypophthalmus  | -----                                                      |    |
| A0A3P8ZCA3_Esox_lucius                  | -----                                                      |    |
| A0A4W5L9K3_Hucho_hucho                  | -----                                                      |    |
| A0A1S3NKU9_Salmo_salar                  | -----                                                      |    |
| W5L4Z3_Astyanax_mexicanus               | -----                                                      |    |
| A0A3B4C5P1_Pygocentrus_nattereri        | -----                                                      |    |
| H3BEM7_Latimeria_chalumnae              | -----MVC-----LWHMRIINDDV                                   | 14 |
| A0A1L8F610_Xenopus_laevis               | -----MPL-----                                              | 3  |
| K7FPA9_Pelodiscus_sinensis              | -----MN-----SSN-----                                       | 5  |
| A0A452GIT0_Gopherus_agassizii           | -----MN-----PPN-----                                       | 5  |
| G3VXX0_Sarcophilus_harrisii             | -----MPSKPVM-----MDP-----                                  | 10 |
| A0A4X2KFU4_Vombatus_ursinus             | -----MPTKPVI-----MDP-----                                  | 10 |
| G1N6K2_Meleagris_gallopavo              | -----                                                      |    |
| F1P5J6_Gallus_gallus                    | -----MS-----SLN-----                                       | 5  |
| U3IH52_Anas_platyrhynchos_platyrhynchos | -----L-----                                                | 1  |
| A0A151MFV8_Alligator_mississippiensis   | -----                                                      |    |
| A0A1U7RBH0_Alligator_sinensis           | -----                                                      |    |
| U3JGA7_Ficedula_albicollis              | -----MS-----TFN-----                                       | 5  |
| A0A3L8SD89_Chloebia_gouldiae            | -----                                                      |    |
| H0Z776_Taeniopygia_guttata              | -----                                                      |    |
| A0A218V5X6_Lonchura_striata_domestica   | -----MS-----TFN-----                                       | 5  |
| A0A0Q3MLL4_Amazona_aestiva              | -----MS-----TFN-----                                       | 5  |
| A0A1V4J6C2_Patagioenas_fasciata_monilis | -----MS-----TFN-----                                       | 5  |
| A0A2I0M3Z8_Columba_livia                | -----MS-----TFN-----                                       | 5  |
| INP5E_Drosophila_melanogaster           | MQHSAGSEERITSSTSPPRSGHKTASSLFGLLSKRPSKVEPHVPTPEsprLQRPVSAC | 60 |

|                                            |                                         |    |
|--------------------------------------------|-----------------------------------------|----|
| INP5E_Homo_sapiens                         | -----PQP-----PEGRTLQQLPGA---P---        | 31 |
| INP5E_Pan_troglodytes                      | -----PQP-----PEGRTLQQLPGA---P---        | 31 |
| A0A2K5K2A0_Colobus_angolensis_palliatu     | -----                                   |    |
| A0A2K6PY13_Rhinopithecus_roxellana         | -----PQL-----PEGRTLQQLPGA---P---        | 31 |
| H2PTZ0_Pongo_abelii                        | -----PQP-----PEGRTLQQLPGA---P---        | 31 |
| A0A2K6U2B2_Saimiri_boliviensis_boliviensis | -----MG-----TRPRWDLPLGLPAA---A---       | 16 |
| A0A2K6F2I5_Propithecus_coquereli           | -----PQQ-----PEGRMLKGLPST---E---        | 27 |
| A0A2K6KCW3_Rhinopithecus_bieti             | -----                                   |    |
| A0A2K5MDJ3_Cercocebus_atys                 | -----PQP-----PEGRTLQQLPGA---P---        | 31 |
| A0A2K5XR75_Mandrillus_leucophaeus          | -----                                   |    |
| A0A0D9RTF7_Chlorocebus_sabaeus             | -----PQP-----PEGRTLQQLPGA---P---        | 31 |
| A0A096NRS4_Papio_anubis                    | -----PQP-----PEGRTLQQLPGA---P---        | 31 |
| A0A2K5U0T2_Macaca_fascicularis             | -----PQP-----PEGRTLQQLPGA---P---        | 31 |
| F7DRP8_Macaca_mulatta                      | -----PQP-----PEGRTLQQLPGA---P---        | 31 |
| A0A2K5PHS4_Cebus_capucinus_imitator        | -----PQP-----PGGRTLQQLPGA---DGA---      | 33 |
| A0A2K5CN95_Aotus_nancymaae                 | -----PQP-----PEGRTLQQLPGA---DGA---      | 33 |
| A0A3Q0DNV4_Tarsius_syrichta                | -----                                   |    |
| HOXE73_Otolemur_garnettii                  | -----PQQ-----SEGRMLKGLPST---DKD---      | 29 |
| I3N2L4_Ictidomys_tridecemlineatus          | -----PGQ-----LEARMLKGLPGA---NKD---      | 32 |
| F7BT66_Callithrix_jacchus                  | -----PRP-----PEGRMLQQLPGA---DGA---      | 33 |
| A0A250Y3V1_Castor_canadensis               | -----                                   |    |
| A0A1S3G993Dipodomys_ordii                  | -----                                   |    |
| H0VEZ3_Cavia_porcellus                     | -----G-Q-----LEAGMLKGLLPTP---AQE---     | 32 |
| G5B6B1_Heterocephalus_glaber               | -----GQP-----EAGMRKKAQLPTP---AQD---     | 33 |
| A0A2Y9E841_Trichechus_manatus_latirostris  | -----PQ-----PGGTMKQLLPG---DKG---        | 32 |
| L5KA82_Pteropus_alecto                     | -----                                   |    |
| A0A5N4EAQ5_Camelus_dromedarius             | -----PQQPAA-QGHLQPEVRMLKGLPNT---EED---  | 41 |
| A0A3Q2HCU7_Equus_caballus                  | -----PEQPFTA-HGHLHPEGKMLKGLPNT---DKD--- | 41 |
| A0A1S2ZM74_Erinaceus_europaeus             | -----PQQ-----PEDTMFKGWLNT---DKD---      | 33 |
| A0A3Q0DCZ7_Mesocricetus_auratus            | -----GQ-----LEGRMLQQLPNT---DKN---       | 32 |
| G3I6Z4_Cricetulus_griseus                  | -----GQ-----LEGRMLQQLPNT---DKN---       | 32 |
| INP5E_Rattus_norvegicus                    | -----GQ-----LEGRMLQQLPNT---EKK---       | 32 |
| INP5E_Mus_musculus                         | -----GQ-----LEGRMLQQLPNT---EKK---       | 32 |
| A0A2Y9NRK2_Delphinapterus_leucas           | -----                                   |    |
| A0A2Y9SXS0_Physter_macrocephalus           | -----                                   |    |
| E1BAU6_Bos_taurus                          | -----SQQPFTA-QGCLCEGSMLKGLLPSN---DEE--- | 41 |
| A0A4W2BWU9_Bos_indicus_x_Bos_taurus        | -----SQQPFTA-QGCLCEGSMLKGLLPSN---DEE--- | 41 |
| L8IYW6_Bos_mutus                           | -----SQQPFTA-QGCLCEGSMLKGLLPSN---DEE--- | 41 |
| A0A452DQV4_Capra_hircus                    | -----SQQPTV-QGCLRPEGSMLKGLLPSN---VEE--- | 41 |
| A0A5J5MJZ6_Muntiacus_reevesi               | -----SQQPTP-QRCLHPEGSMLKGLLPSN---DEE--- | 41 |
| A0A5N3WU40_Muntiacus_muntjak               | -----SQQPTP-QRCLHPEGSMLKGLLPSN---DEE--- | 41 |
| A0A3Q7V2Z5_Ursus_arctos_horribilis         | -----PPQPGA-QGHPQPEDRMLKGLPNA---GKD---  | 41 |
| A0A452Q8J6_Ursus_americanus                | -----PPQPGA-QGHPQPEDRMLKGLPNA---GKD---  | 41 |
| A0A452VEA9_Ursus_maritimus                 | -----PPQPGA-QGHPQPEDRMLKGLPNA---GKD---  | 41 |

A0A2U3ZR12 *Odobenus rosmarus divergens* -----MLKGQLPNT--GRD--- 12  
A0A3Q7N7C7 *Callorhinus ursinus* -----MLKGQLPNT--GRG--- 12  
A0A2Y9HBQ8 *Neomonachus schauinslandi* -----MLKGQLPNT--GRD--- 12  
A0A4B5NC41 *Lynx pardinus* -----PPQPTA-QGHLQPEGRMLKGQLPHA--GQD--- 41  
A0A3Q7QUW1 *Vulpes vulpes* -----MLKGQLPST--GKD--- 12  
F1PDA7 *Canis lupus familiaris* -----MPSKLPEDRMLKGQLPST--GKD--- 21  
A0A2Y9JFT0 *Enhydra lutris kenyoni* -----PPQFAA-QGHLQPEDRMLKGQLPNT--GKD--- 41  
M3YJ90 *Mustela putorius furo* -----PPQFAA-QGHLQPEDRMLKGQLPNT--GKD--- 41  
I3JX61 *Oreochromis niloticus* -----MTEDGEDGPLHHSCE-----APGK--G--- 20  
A0A3Q4H5I7 *Neolamprologus brichardi* -----MTEDGEDGPLHHSCE-----APGK--G--- 20  
A0A3B4FRA1 *Pundamilia nyererei* -----MTEDGEDGPLHHSCE-----APGK--G--- 20  
A0A3P8QQM7 *Astatotilapia calliptera* -----MTEDGEDGPLHHSCE-----APGK--G--- 20  
W5M6X5 *Lepisosteus oculatus* -----MTEDGEDGPLHHSCE-----APGK--G--- 20  
A0A3B3RRU9 *Paramormyrops kingsleyae* -----TLNGVWVSGGTPEG--EGT--- 20  
A0A4W4HDW3 *Electrophorus electricus* -----MNENGDAIVFPFPAE-----PPSRK---D--TR--- 23  
A0A3Q3IZN0 *Monopterus albus* -----MTENGEDSSLHWSRE-----APGK--G--- 20  
A0A3P8VEE4 *Cynoglossus semilaevis* -----MTANGEDGSLHL-----APGK--G--- 12  
A0A3Q1H6D9 *Anabas testudineus* -----MTMNGEDINLHQSFE-----APGK--G--- 20  
A0A4W6CEK3 *Lates calcarifer* -----MTENGEDSSLHQNCO-----APDK--G--- 20  
A0A3B4VK37 *Seriola dumerili* -----MTENGEDSSIHQYSE-----APDK--G--- 20  
A0A3Q3GNS7 *Labrus bergylta* -----MAGHERMGDSLLRQYAE-----APGQ--G--- 22  
A0A3Q3RRU7 *9TELE Mastacembelus armatus* -----MTDNGEDSSLHHSCE-----APGK--E--- 20  
A0A4U5UTG8 *Collichthys lucidus* -----MTENGEDSPLHQSCE-----APDK--G--- 20  
A0A3B4ZI99 *Stegastes partitus* -----MTENGEECTLHQSCE-----APAK--G--- 20  
A0A3Q1H1R6 *Acanthochromis polyacanthus* -----MTENGEDCPLHQSDE-----APGK--G--- 20  
A0A3Q1CXU7 *Amphiprion ocellaris* -----MTENGEDCPLHQSDE-----APGK--G--- 20  
A0A3P8SMU2 *Amphiprion percula* -----MTENGEDCPLHQSDE-----APGK--G--- 20  
A0A5J5DH05 *Etheostoma spectabile* -----MSENGEDSLLHQSCE-----APAK--G--- 20  
A0A4B4DDW2 *Perca flavescens* -----MTENGEDSLLHQSCE-----APAK--G--- 20  
A0A4Z2H351 *Liparis tanakae* -----MTENGAHGPIHQSRQ-----APSK--G--- 20  
W5UJU6 *Ictalurus punctatus* -----MNENEDLIVFPFQPS-----EALCRN--D--AA--- 25  
A0A5N5KDW8 *Pangasianodon hypophthalmus* -----MTENGEDSNPRQPVG-----GGLPGGAPDG--KDT--- 30  
A0A3P8ZCA3 *Esox lucius* -----MRMTENGEDSSPSQPD-----GVLPRGAPGG--KDP--- 29  
A0A4W5L9K3 *Hucho hucho* -----MRMTENGEDSSPSQPD-----GVLPRGAPGG--KDP--- 29  
A0A1S3NKU9 *Salmo salar* -----MNENGDITVFPQPED-----EVRSKPEPSS--KT--- 27  
W5L4Z3 *Astyanax mexicanus* -----MNENGDITVFPQPED-----EVRSKPEPSS--KT--- 27  
A0A3B4C5P1 *Pygocentrus nattereri* -----MNENGDITVFPQPED-----EVRSKPEPSS--KT--- 27  
H3BEM7 *Latimeria chalumnae* P----GFETNTLNIELMRMDIQ-----NGLSVQPIAGVSHSLTPTKLKHKQVENQ--EAE--- 63  
A0A1L8F610 *Xenopus laevis* -----RME-RQNPGAVFASGED-----NV--- 21  
K7FPA9 *Pelodiscus sinensis* -----GFP--QHAVACV--TSSTEGRVLQDQVKK--AGG--- 34  
A0A452GIT0 *Gopherus agassizii* -----GFS--PHAVACI--TSSTEGRVLQDQVKK--AGG--- 34  
G3VXX0 *Sarcophilus harrisii* -----KHSVSVQVACVSPQSDT-----AGG--- 28  
A0A4X2KFU4 *Vombatus ursinus* -----KHSVSVQVACVSPQSDT-----AGG--- 28  
G1N6K2 *Meleagris gallopavo* -----KHSVSVQVACVSPQSDT-----AGG--- 28  
F1P5J6 *Gallus gallus* -----GFS--QHSGTCTI--TQRAEGGAVQDLQAKK--AGK--- 34  
U3IH52 *Anas platyrhynchos platyrhynchos* -----GLEVSEPPGPLFASGPGPGGALLRPPGGA--PGA--- 33  
A0A151MFV8 *Alligator mississippiensis* -----GFS--QHSGTCTI--TQRAEGGAVQDLQAKK--AGK--- 34  
A0A1U7RBH0 *Alligator sinensis* -----HADGRVL-----R--EHQ--- 11  
U3JGA7 *Ficedula albicollis* -----GFP--QHSRVCL--TRSMEGGAVQDLQAKK--AGK--- 34  
A0A3L8SD89 *Chloebia gouldiae* -----MEGGAVQDLQAKK--AGK--- 16  
H0Z776 *Taeniopygia guttata* -----GFS--QHSGTCTI--TQRAEGGAVQDLQAKK--AGK--- 34  
A0A218V5X6 *Lonchura striata domestica* -----GFP--QHSRCL--TRSMEGGAVQDLQAKK--AGK--- 34  
A0A0Q3MLL4 *Amazona aestiva* -----GFP--QHSRCL--TRSMEGGAVQDLQAKK--AGK--- 34  
A0A1V4J6C2 *Patagioenas fasciata monilis* -----GFP--QHSRCL--TRSMEGGAVQDLQAKK--AGK--- 34  
A0A2I0M3Z8 *Columba livia* -----GFP--QHPGACA--TPSTEGGAVQDLQAKK--AGK--- 34  
INP5E *Drosophila melanogaster* GQYDVSPAKCNADTANHVNNNGSTLKS-QTLPLEKSHSGLISFHRRRAKPPSSSRGKNHSH 11 9

INP5E *Homo sapiens* -----PAQR-AG---SP-----PDAPGSESPALACSTPATPSGEDPP---ARAAPIAP 72  
INP5E *Pan troglodytes* -----LAQR-AG---SP-----PDVPGSESPALACSTPATPSGEDPP---ARAAPIAP 72  
A0A2K5K2A0 *Colobus angolensis palliatus* -----LAQR-AG---SP-----PDVPGSESPALACSTPATPSGEDPP---ARAAPIAP 72  
A0A2K6PY13 *Rhinopithecus roxellana* -----LAPR-AG---SP-----PDAPGSESPALACSTPATPSGEDPP---ARAAPVTP 72  
H2PTZ0 *Pongo abelii* -----LAQR-AG---SP-----PDAPGSESPALACSTPATPSGEDPP---ARAAPIAP 72  
A0A2K6U2B2 *Saimiri boliviensis boliviensis* -----LAPR-EE---SP-----HDAPSPESPALGGSAPAALSGEPPP---QAAPAPIAP 57  
A0A2K6F2I5 *Propithecus coquereli* -----KDLA-QS---SS-----PGSLPSTSPVLPFSIPAKLSSADPQ---TEAKPIAP 68  
A0A2K6KCW3 *Rhinopithecus bieti* -----PK-TA---SK-----PR-GVKEINAFPCGSPGLPV----- 39  
A0A2K5MDJ3 *Cercocebus atys* -----LAPH-AG---SP-----PDAPGSESPALACSTPATPSGEDPP---ARAAPVTP 72  
A0A2K5XR75 *Mandrillus leucophaeus* -----LAPH-AG---SP-----PDAPGSESPALACSTPATPSGEDPP---ARAAPVTP 72  
A0A0D9RTF7 *Chlorocebus sabaeus* -----LAPR-AG---SP-----PDAPGSESPALACSTPATPSGEDPP---ARAAPVTP 72  
A0A096NRS4 *Papio anubis* -----LAPR-AG---SP-----PDAPGSESPALACSTPATPSGEDPP---ARAAPVTP 72  
A0A2K5U0T2 *Macaca fascicularis* -----LAPR-AG---SP-----PDAPGSESPALACSTPATPSGEDPP---ARAAPVTP 72  
F7DRP8 *Macaca mulatta* -----LAPR-AG---SP-----PDAPGSESPALACSTPATPSGEDPP---ARAAPVTP 72  
A0A2K5PHS4 *Cebus capucinus imitator* -----LAPR-EG---SP-----PDAPGSESPALGCSAPAALSGEPPP---QAAPAPIAP 66  
A0A2K5CN95 *Aotus nancymae* -----LAPR-EA---SP-----PDAPGSESPALGCSAPAALSGEPPP---APAAPLTP 74  
A0A3Q0DNV4 *Tarsius syrrhata* -----LAPR-AG---SP-----PDAPGSESPALACSTPATPSGEDPP---ARAAPVTP 72  
HOXE73 *Otolemur garnettii* -----LAQS-SG---TGAPTTCCQGEKSPVLPFSIPAKLSSGDPQ---AKAKPITP 75  
I3N2L4 *Ictidomys tridecemlineatus* -----LLPS-PG---ALP---TPHRQDPEKNPVPSFSDPAKISSDPQ---ARAKPTTP 76  
F7BT66 *Callithrix jacchus* -----LAPR-EG---SP-----PDAPGSESPALGCSAPATLSGEETP---QAQVPIAP 74  
A0A250Y3V1 *Castor canadensis* -----LVPS-TG---SLPV---THCQDPEKSPMPPLSIPAKTNSQDSR---KMAKPLAP 71  
A0A1S3G993 *Dipodomys ordii* -----LAPR-AG---SP-----PDAPGSESPALACSTPATPSGEDPP---ARAAPVTP 14  
HOVEZ3 *Cavia porcellus* -----LCPG-TL---PG---ACYEAPEDGPTLPRSDRSKVDSETSPA---TAAEPLIP 75

G5B61\_Heterocephalus\_glaber -----LPPT-PG----SPPA--ACCAAPEDGPTLPRDDRAKVDGETPP----ATAKPVTP 77  
AOA2Y9E841\_Trichochus\_manatus\_latiostris -----LAQN-PP----APP-----PTGSPGKTATKDTQ----AMVKALTP 63  
L5KA82\_Pteropus\_lecto -----LALR-PG----SAPT--NTPCGLEKSPGVPLNI PAKISGEGQP----AQAEFPTP 48  
AOA5N4EAQ5\_Camelus\_dromedarius -----PVPD-PW----SL-P--DSRQAPEKSPVLPPLNI PAQVTDDEDPH----AKARAFAP 84  
AOA3Q2HCU7\_Equus\_caballus -----LTPC-PE----SLPT--DSCQGPEKSPVLPPLNI PAKVSNEDPQ----AKANPFTP 85  
AOA1S2ZM74\_Erinaceus\_europaeus -----LTSN-PG----SPPT--SNCQGPEKSPALPSNI SAKSH-DDPQ----TKAKLFAP 76  
AOA3Q0DCZ7\_Mesocricetus\_auratus -----LTPA-AG----SLPA--TEPQGESEANTPPFISI PAKPSNQN-----P 67  
G3I6Z4\_Cricetulus\_griseus -----LTPT-PG----SLPA--TEPQGSSETNMPFFSI PAKPSNQN-----P 67  
INP5E\_Rattus\_norvegicus -----LIPT-SA----SLPA--ADSQSSQTNMPPPLSMPAKPSNQNLQ----AKANLITP 76  
INP5E\_Mus\_musculus -----LIPT-PG----FLPA--SDSQGSETNMPFFSI PAKTSNQNPQ----TKANLITP 76  
AOA2Y9NRK2\_Delphinapterus\_leucas -----LASR-PG----SAAA--DDRRGPEKSPVRLPDLTPAQVGNEDPQ----ARGRFSP 56  
AOA2Y9SXS0\_Physeter\_macrocephalus -----PA-----ARPVLPDAPAPVGNEDPR----ATGRPFSP 41  
E1BAU6\_Bos\_taurus -----PVPC-LG----SPAA--GGRQGFERSPELPLDTPPEQVSNEDPR----AQARFPTP 85  
AOA4W2BWU9\_Bos\_indicus\_x\_Bos\_taurus -----PVPC-LG----SPAA--GGHQGFERSPELPLDTPPEQVSNEDPR----AQARFPTP 85  
L8IYW6\_Bos\_mutus -----PVPC-LG----SPAA--GSRQGFERSPELPLDTPPEQVSNEDPR----AQARFPTP 85  
AOA452DQV4\_Capra\_hircus -----PVPC-LG----SPAA--GDRRGPEKSSLELPPDTPPEQVSNKDPQ----AQARFPTP 85  
AOA5J5MJZ6\_Muntiacus\_reevesi -----PVPC-LG----SPAA--GDRQGFERSPELPLDTPPEQVSNEDPQ----AQARFPTP 85  
AOA5N3WU40\_Muntiacus\_muntjak -----PVPC-LG----SPAA--GDRQGFERSPELPLDTPPEQVSNEDPQ----AQARFPTP 85  
AOA3Q7V225\_Ursus\_arctos\_horribilis -----LPAH-PG----SPPT--NIAQGFERSPELPLNLPQISNEDPQ----AKATPFTP 85  
AOA452Q8J6\_Ursus\_americanus -----LPAH-PG----SPPT--NIAQGFERSPELPLNLPQISNEDPQ----AKATPFTP 85  
AOA452VEA9\_Ursus\_maritimus -----LPAH-PG----SPPT--NIAQGFERSPELPLNLPQISNEDPQ----AKATPFTP 85  
AOA2U3ZR12\_Odobenus\_rosmarus\_divergens -----LAAH-PG----SPPT--NNGQGFERSPELPLNLPQISNEDPQ----AKATPFTP 56  
AOA3Q7N7C7\_Callorhinus\_ursinus -----LAAH-PG----SPPT--NNGQGFERSPELPLNLPQISNEDPQ----AKATPFTP 56  
AOA2Y9HBQ8\_Neomonachus\_schauinslandi -----LEAH-PG----SPPT--NNGQGFERSPELPLNLSAQISNEDPQ----AKATPFTP 56  
AOA485NC41\_Lynx\_pardinus -----LVPH-PG----SLPS--NGCQGFERSPELPLSLPAGINEDPQ----AKAFPTP 85  
AOA3Q7QUW1\_Vulpes\_vulpes -----VAPH-LG----PLPT--NHGQDFERTVPLPLTFPAQISNEDPE----AKAFPTP 56  
F1PDA7\_Canis\_lupus\_familiaris -----VAPH-LG----PPPT--NHGQDFERTVPLPLTFPAQISNEDPE----AKAFPTP 65  
AOA2Y9JFT0\_Enhydra\_lutris\_kenyoni -----LAAH-PG----SPPA--NNGEGPEKSPVLPKLPQISNEDPQ----AKAASFIP 85  
M3YJ90\_Mustela\_putorius\_furo -----LAAH-PG----SPPA--NSGEGPEKSPVLPKLPQISNEDPQ----AKATSFPT 85  
I3JX61\_Oreochromis\_niloticus -----DSIANDS-----SKLKTSIVDVKSTNGHKDDLRL-----RNTGEGISPYQP 61  
AOA3Q4H5I7\_Neolamprologus\_brichardi -----DSIANDS-----SKLNTSIVDVKSTNGHKDDLRL-----RNTGEGISPYQP 61  
AOA3B4FRA1\_Pundamilia\_neyereii -----DSIANDS-----SKLNTSIVDVKSTNGHKDDLRL-----RNTGEGISPYQP 61  
AOA3P8QQM7\_Astatotilapia\_calliptera -----DSIANDS-----SKLNTSIVDVKSTNGHKDDLRL-----RNTGEGISPYQP 61  
W5M6X5\_Lepisosteus\_oculatus -----M-----TKERPHLP 9  
AOA3B3RRU9\_Paramormyrops\_kingsleyae -----GRLS-SG-----QRSEKCTDDEETFNDFTRFPADEVDRGNANSSSLPHHLP 68  
AOA4W4HDW3\_Electrophorus\_electricus -----SFHIEG----GKDI-SNEIRSTKKSSEALNLPED--ER-N--KGSTISPYQP 66  
AOA3Q3IZN0\_Monopterus\_albus -----ESAVNAS-----RSCASLVDAKPCKEYNEALKLTA-----GNAEGEIPYQP 63  
AOA3P8VEE4\_Cynoglossus\_semilaevis -----DSVVKDS-----RPLKTSLVDPKPGKEHYVAQQKTL-----TNGTDATVYK 54  
AOA3Q1H6D9\_Anabas\_testudineus -----DSIVNDS-----RPFCKTSLVDVTKSCKEHNDAKLPV-----VNAQGEINPFQP 63  
AOA4W6CEK3\_Lates\_calcarifer -----DSVVVDS-----RPRKTSLVDPKPCKEHSDALKLTA-----RKGEVGSVYQP 63  
AOA3B4VK37\_Seriola\_dumerili -----DSVVNDS-----RPLKTSLVDPKPCKEHNDALELAA-----RNREGISPYQP 63  
AOA3Q3GNS7\_Labrus\_bergyta -----DPVVVDS-----RALKTPLVTAKFVREPKDALKLSA-----TCAEGAVSVYQP 65  
AOA3Q3RRU7\_9TELE\_Mastacembelus\_armatus -----DSVINDS-----RPYETSLVDSKSKCKEHNDAKLLTA-----GNSEGISPYQP 63  
AOA4U5UTG8\_Collichthys\_lucidus -----DVIDSIS-----RSLKTSLEDAKTCKDHNDAKPLAA-----RNTDGGDFGQYQP 63  
AOA3B4ZI99\_Stegastes\_partitus -----NSVANDS-----KPIKTSLVDPKSPSEHNDELKIAAA-----DKLAGGEFSPQP 65  
AOA3Q1H1R6\_Acanthochromis\_polyacanthus -----NSVGNDS-----KPLKTSLVDPVTSPEHNDELKIAAAAAA--AARNAGGEISPYQP 70  
AOA3Q1CXU7\_Amphiprion\_ocellaris -----NSVGNDS-----KPLKTSLVGVKSASEHNDELKIAA-----AARNAGGEISPYQP 65  
AOA3P8SMU2\_Amphiprion\_percula -----NSVGNDS-----KPLKTSLVGVKSASEHNDELKIAA--AA--AARNAGGEISPYQP 68  
AOA5J5DH05\_Etheostoma\_spectabile -----DSLVSDS-----RTLKTSVVDASSCKEHNDAKLLTD-----RNAEQISLYQP 63  
AOA484DDW2\_Perca\_flavescens -----DSLVSDS-----RPLETSLVDAKSKCKEHNDAKLLTD-----RNAEQISLYQP 63  
AOA4Z2H351\_Liparis\_tanakae -----ASHVTDG-----RPLTSLVDPTSCRDHGVHTLSA-----RNAEQISLYQP 63  
W5UJ6\_Ictalurus\_punctatus -----NFSIEV-----ANDRSSKEQLSSKSSNEVLQTPQD--EQ--REQDKPGPYIP 69  
AOA5N5KDW8\_Pangasianodon\_hypophthalmus -----MTEPI-----KNS-----SLVRSRLMKCPRP--LK--MSKGNKTNVPTCL 37  
AOA3P8ZCA3\_Esox\_lucius -----GGFGGDK-----A-----KTNKLLNETLKFPPQ-----DIGDQNSKTSYQP 66  
AOA4W5L9K3\_Hucho\_hucho -----GGVSSDK-----RPVNPPTEDSKPTKLLNDTLKFPPQ-----DVQDQSSKTSYQP 74  
AOA1S3NKU9\_Salmo\_salar -----EGVSSDK-----RPVNLPTEDNKPTKLL--DTLKFPPQ-----DVQDQSSKTSYQP 73  
W5L4Z3\_Astyanax\_mexicanus -----SFNIEG-----GDGNTTE--PRATKCKNEDLHISQD--EQ--I--QETSINPFQP 69  
AOA3B4C5P1\_Pygocentrus\_nattereri -----SFNVGD-----VNRKTKKEQLKGTNNSSEVLQIPQD--ER--I--KETSINPYQP 71  
H3BEM7\_Latimeria\_chalumnae -----ERKKKEE-----IVESAEEEDYKNETLNDTLKFPPEEVGHGK-----GAHKHFIP 110  
AOA1L8F610\_Xenopus\_laevis -----SERKYSIGIREWLEMVQD---QTLTHSMNESVRRGSTENPGA--VPSDVVPRPCK 71  
K7FPA9\_Pelodiscus\_sinensis -----AMRKEAGDSRVLALKDH---PDIESFLNDTLRF---PPDE--IKPNMKIKSATP 80  
AOA452GIT0\_Gopherus\_agassizii -----AMRKEAGDSRVLAEDEH---PDIESFLNDTLRL---PPDE--IKPNMKIKSVTP 80  
G3VXX0\_Sarcophilus\_harrisii -----MLKGEGLKNDLPERTEPCGNTSEFFNRLRL---TTEE--MKFNMKIKSITP 76  
AOA4X2KFU4\_Vombatus\_ursinus -----MLKEAGLKNELPERNEPCGNTSEFFNRLRL---TTEE--MKFNMKIKSITP 76  
G1N6K2\_Meleagris\_gallopavo -----P-----PEE--LKANVKIKSITP 15  
F1P5J6\_Gallus\_gallus -----AAKKTSGNGVLTTFESP---PRVDTLLNETLKL---LPDE--LKANVKIKSITP 80  
U3IH52\_Anas\_platyrhynchos\_platyrhynchos -----AVA--AAGPGAAG-----AE-----L-----A-----GPGAAGGGRPA 60  
AOA151MFV8\_Alligator\_mississippiensis -----AMQKEAGDSTASPTEDH---PDTGS-----SGD--IKASLRATLFTP 48  
AOA1U7RBH0\_Alligator\_sinensis -----AAKKEAGGDGT-----P---PKIGTPISETLKL---LPED--LKANMKIRISITP 75  
U3JGA7\_Ficedula\_albicollis -----AAKKEAGGDGA-----P---PKIGTPISETLKL---LPDE--LKANMKIKSITP 57  
AOA3L8SD89\_Chloeobia\_gouldiae -----AAKKEAGGDGA-----P---PKIGTPISETLKL---LPEE--LKANMKIKSITP 15  
HOZ776\_Taeniopygia\_guttata -----AAKKEAGGDGA-----P---PKIGTPISETLKL---LPEE--LKANMKIKSITP 75  
AOA218V5X6\_Lonchura\_striata\_domestica -----AAKKEAGGDGA-----P---PKIGTPISETLKL---LPEE--LKANMKIKSITP 75  
AOA0Q3MLL4\_Amazona\_aestiva -----AAKKEAGGDGA-----P---PKIGTPISETLKL---LPEE--LKANMKIKSITP 80  
AOA1V4J6C2\_Patagioenas\_fasciata\_monilis -----AAKKEAGGDGA-----P---PKIGTPISETLKL---LPEE--LKANMKIKSITP 80  
AOA2I0M3Z8\_Columba\_livia -----AAKKEAGGDGA-----P---PKIGTPISETLKL---LPEE--LKANMKIKSITP 80  
INP5E\_Drosophila\_melanogaster -----AAKKEAGGDGA-----P---PKIGTPISETLKL---LPEE--LKANMKIKSITP 80  
RHSTDAGSQSDGGADVMMRKS---PKHRSPNH-NRFS---HQFSLCKAEKPMPT 169

INP5E\_Homo\_sapiens RPPAR--PRLERALS---LDDKGWRR---RRFRGSQE-DLE--ARNGTSPSRGSVQS-EG 120  
INP5E\_Pan\_troglodytes RPPAR--PRLERALS---LDDKGWRR---RRFRGSQE-DLE--ARNGTSPSRGSVQS-EG 120

A0A2K5K2A0\_Colobus\_angolensis\_palliatus RPPAR--PRLERALS---LDDKGWRR---RRFRGSQE-DLE--ARNGTSPSRRSVQS-EG 49  
A0A2K6PY13\_Rhinopithecus\_roxellana RPPAR--PRLERALS---LDDKGWRR---RRFRGSQE-DLE--ARNGTSPSRGTVQS-EG 121  
H2PTZ0\_Pongo\_abelii RPPAR--PRLERALS---LDDKGWRR---RRFRGSQE-DLE--ARNGTSPSRGSQEQS-EG 120  
A0A2K6U2B2\_Saimiri\_boliviensis\_boliviensis RPPAR--PRLERALS---LDDRGWRR---RRFRGSQE-NLE--ARNGTSPSRGSVQS-EG 105  
A0A2K6F2I5\_Propithecus\_coquereli RPPARPRPRLERALS---LDDRGWRR---RRFRGSHE-DLA--AQNGASPSRGSQEQR-EA 118  
A0A2K6KCW3\_Rhinopithecus\_bieti -----LDHPAWRR---KEENQPLP-K-----QRVPTAV-A-SS 67  
A0A2K5MDJ3\_Cercocebus\_atys RPPAR--PRLERALS---LDDKGWRR---RRFRGSQE-DLE--TRNGTSPSRGSVQS-EG 120  
A0A2K5XR75\_Mandrillus\_leucophaeus -----  
A0A0D9RTF7\_Chlorocebus\_sabaeus RPPAR--PRLERALS---LDDKGWRR---RRFRGSQE-DLE--ARNGTSPSRGSVQS-EG 120  
A0A096NRS4\_Papio\_anubis RPPAR--PRLERALS---LDDKGWRR---RRFRGSQE-DLE--ARNGTSPSRGSVQS-EG 120  
A0A2K5U0T2\_Macaca\_fascicularis RPPAR--PRLERALS---LDDKGWRR---RRFRGSQE-DLE--ARNGTSPSRGSVQS-EG 120  
F7DRP8\_Macaca\_mulatta RPPAR--PRLERALS---LDDKGWRR---RRFRGSQE-DLE--ARNGTSPSRGSVQS-EG 120  
A0A2K5PHS4\_Cebus\_capucinus\_imitator RPPAR--PRLERALS---LDDRGWRR---RRFRGSQE-DLE--ARNGTSPSRGSVRS-EG 114  
A0A2K5CN95\_Aotus\_nancymae RPPAR--PRLERALS---LDDRGWRR---RRFRGSQE-DLE--ARNGTSPSRSSVQS-EG 122  
A0A3Q0DNV4\_Tarsius\_syrichta -----  
HOXE73\_Otolemur\_garnettii HPPAR--PRLERALS---LDDKGWRR---RHFQGSHE-DPE--AGNEACPSRASKQR-QA 123  
I3N2L4\_Ictidomys\_tridecemlineatus QPPTR--PRLERTL---LDDKGWRR---RRFRSQE-DLA--TQGGASPYKGSQD-MA 124  
F7BT66\_Callithrix\_jacchus RPPAR--PRLERALS---LDDRSWRR---RRFRGSQE-DLE--ARNGTSPSRGSVQS-DG 122  
A0A250Y3V1\_Castor\_canadensis QPPMR--PRLERALS---LDDKGWRR---RRFQSSQE-DLA--AQDGASPCRSMQD-TA 119  
A0A1S3G993Dipodomys\_ordii QPPMK--PRLERALS---LDDKAWRR---RRFPNSQE-DLSAAERDASPRASGSPHQAGG 65  
HOVEZ3\_Cavia\_porcellus HPPAR--PRLERALS---LDDRGWRR---RRFRSQE-DLA--SRDGAGPSEGMQ-N-A 122  
G5B6B1\_Heterocephalus\_glaber HPAMR--PRMERALS---LDDRGWRR---RRFRSQE-DLA--ARVEASPGGGSMQ-N-P 124  
A0A2Y9E841\_Trichechus\_manatus\_latirostris MPPAR--PRLERTL---LDEKGWRR---RRFRASQE-DLAGQDK--AGPC-----KD 105  
L5KA82\_Pteropus\_alecto KPPAR--PKLERALS---LDEKGWRR---RRLQTSHE-DLE--ARSGASPSGGSLPD--Q 95  
A0A5N4EAQ5\_Camelus\_dromedarius KP-P-TRPRLERALS---LDEKGWRR---RRFRSRE-DLA--GQSGASPSRGLQD--E 131  
A0A3Q2HCU7\_Equus\_caballus KPPTR--PRLERALS---LDEKGWRR---RRFRSQE-DLA--SRNGASPSGGSLQD-EA 133  
A0A1S2ZM74\_Erinaceus\_europaeus KPPPM-RPRLERALS---LDEKSWRR---RRFRSQE-DLD--SQNGTSPSRGLKE--E 124  
A0A3Q0DCZ7\_Mesocricetus\_auratus QLPMR--PKLERTLS---LDDKGWRR---RRFPQSQE-DLT--VQNGASPCRVSTQD--S 114  
G3I6Z4\_Cricetulus\_griseus QLPMR--PKLERTLS---LDDKGWRR---RRFPQSQE-DLT--VQNGASPSGGSLQD--E 114  
INP5E\_Rattus\_norvegicus QPPIR--PKLERTLS---LDDKGWRR---RRFRGSQE-DLT--VQNGASPCRGSLQD--S 123  
INP5E\_Mus\_musculus QPPTR--PKLERTLS---LDDKGWRR---RRFRGSQE-DLT--VQNGASPCRGSLQD--S 123  
A0A2Y9NRK2\_Delphinapterus\_leucas KPPP-PRPRLERALS---LDEKGWRR---RRFRSRE-DLA--TRNGSPSGSLQD--E 104  
A0A2Y9XS0\_Physeter\_macrocephalus KPPP-PRPRLERALS---LDEKGWRR---RRFRSRE-DLA--ARNGASPSGGSLQD--E 89  
E1BAU6\_Bos\_taurus KPPP-PRPRLERALS---LDEKGWRR---RRFRSRE-DLT--VRNGASPSGGSLQD--E 133  
A0A4W2BWU9\_Bos\_indicus\_x\_Bos\_taurus KPPP-PRPRLERALS---LDEKGWRR---RRFRSRE-DLT--VRNGASPSGGSLQD--E 133  
L8IYW6\_Bos\_mutus KPPP-PRPRLERALS---LDEKGWRR---RRFRSRE-DLT--VRNGASPSGGSLQD--E 133  
A0A452DQV4\_Capra\_hircus KPPP-PRPRLERALS---LDEKGWRR---RRFRSRE-DLT--VRNGASPSGGSLQD--E 133  
A0A5U5MJZ6\_Muntiacus\_reevesi KPPP-PRPRLERALS---LDEKGWRR---RRFRSRE-DLT--VRNGASPSGGSLQD--E 133  
A0A5N3WU40\_Muntiacus\_muntjak KPPP-PRPRLERALS---LDEKGWRR---RRFRSRE-DLT--VRNGASPSGGSLQD--E 133  
A0A3Q7V225\_Ursus\_arctos\_horribilis KPPTR--PRLERALS---LDEKAWRR---RRFRSHE-DLA--AHGGASPSRGLQD--E 132  
A0A452Q8J6\_Ursus\_americanus KPPTR--PRLERALS---LDEKAWRR---RRFRSHE-DLA--AHGGASPSRGLQD--E 132  
A0A452VEA9\_Ursus\_maritimus KPPTR--PRLERALS---LDEKAWRR---RRFRSHE-DLA--AHGGASPSRGLQD--E 132  
A0A2U3ZR12\_Odobenus\_rossmarus\_divergens KPPTR--PRLERALS---LDEKAWRR---RRFRSHE-DLA--ARSGASPSRGLQD--E 103  
A0A3Q7N7C7\_Callorhinus\_ursinus KPPTR--PRLERALS---LDEKAWRR---RRFRSHE-DLA--ARSGASPSRGLQD--E 103  
A0A2Y9HBQ8\_Neomonachus\_schauinslandi KPPTR--PRLERALS---LDEKAWRR---RRFRSQE-DLA--ARGGASPSRGLQD--E 103  
A0A485NC41\_Lynx\_pardinus KPPTR--PRLERALS---LDEKAWRR---RRFRSHE-DLA--TRSGTSPSRGLQD--E 132  
A0A3Q7QUW1\_Vulpes\_vulpes KPLLQ--PRLERALS---LDEKAWRR---RRFRSPE-DLA--AGSGTGGSRGLQD--E 103  
F1PDA7\_Canis\_lupus\_familiaris KPPPQ--PRLERALS---LDEKAWRR---RRFRSPE-DLA--AGSGAGSRSGLQD--E 112  
A0A2Y9JFT0\_Enhydra\_lutris\_kenyoni KPPPR--PRLERALS---LDEKAWRR---RRFPSSHE-DLA--AHVGASPCRGSSQD--E 132  
M3YJ90\_Mustela\_putorius\_furo KPPPR--PRLERALS---LDEKAWRR---RRFPSSHE-DLA--AHVGASPCRGSSQD--E 132  
I3JX61\_Oreochromis\_niloticus RPPLLPRLSKSS--K-SISLEETVRT--RRLRNSQE-SLS--DPAETGSSTDSLKEDET 112  
A0A3Q4H5I7\_Neolamprologus\_brichardi RPPLLPRLSKSS--K-SISLEETVRT--RRLRNSQE-SLS--DPAETGSSTDSLKEDET 112  
A0A3B4FRA1\_Pundamilia\_nyererei RPPLLPRLSKSS--K-SISLEETVRT--RRLRNSQE-SLS--DPAETGSSTDSLKEDET 112  
A0A3P8QQM7\_Astatotilapia\_calliptera RPPLLPRLSKSS--K-SISLEETVRT--RRLRNSQE-SLS--DPAETGSSTDSLKEDET 112  
W5M6X5\_Lepisosteus\_oculatus RPPLLPKPSEQSSIGTRASNEEKLR--RKLRTSQD-SLT--DPTGTGSSTDSLQDEKS 63  
A0A3B3RRU9\_Paramormyrus\_kingsleyae KPSLMKTKNSSLE--ANVRRRI--KPLKTSQE-SLT--DRTGTGSSTDSLQD-- 117  
A0A4W4HDW3\_Electrophorus\_electricus HPPPLPKPPSMGKGGKPMSEKIRG--RKLKSSQE-SLT--DPTGTGSSTDSLKEDRA 120  
A0A3Q3IZN0\_Monopterus\_albus RPPSLPRLFKSS--K-SGSVDESVRT--RRLRNSQE-SLS--DSADIGSSTDSLREDQT 114  
A0A3P8VEE4\_Cynoglossus\_semilaevis LPLLPRLSKSS--R-SSSLEETVRN--RRLRNSQE-SLS--DRADTGSSTDSLKEEMM 105  
A0A3Q1H6D9\_Anabas\_testudineus RPPSLPRLSKSN--K-SGSVEKTVRS--RRLRNSQE-SLS--DPAETGSSTDSLKEDQT 114  
A0A4W6CEK3\_Lates\_calcarifer RPPSLPRQAKSS--K-SGSVEETVRN--RRLRNSQE-SLS--DPAETGSSTDSLKEDQT 114  
A0A3B4VK37\_Seriola\_dumerili RPPSLPRQSKPS--K-SGSVAETVRN--RRLRNSQE-SLS--DPAETGSSTDSLKEDQT 114  
A0A3Q3GNS7\_Labrus\_bergylta RPPSQRLS--G--K-SCSVEENLIT--RRLKNSQE-SLS--DPTGTGSSTDSLREDQA 114  
A0A3Q3RRU7\_9TELE\_Mastacembelus\_armatus RPPSLPRLSKSS--K-TGSVEETVRT--RRLRNSQE-SLS--DPAETGSSTDSLKEDQT 114  
A0A4U5UTG8\_Collichthys\_lucidus RPPSLPKLF--T--R-GGSVEETVRT--RRLRNSQE-SLS--DPAETGSSTDSLKENRT 112  
A0A3B4ZI99\_Stegastes\_partitus RPPLLPRLSRS--R-SGSVEETVRT--RRLRNSQE-SLS--DPAETGSSTDSLREDQT 112  
A0A3Q1H1R6\_Acanthochromis\_polyacanthus RPPLLPRLSKSS--R-SGSIEETVRT--RRLRNSQE-SLS--DPTGTGSSTDSLREDQT 121  
A0A3Q1CXU7\_Amphiprion\_ocellaris RPPPLPRLS--S--R-SGSIEETVRT--RRLRNSQE-SLS--DPTGTGSSTDSLREDQT 114  
A0A3P8SMU2\_Amphiprion\_pectula RPPPLPRLS--S--R-SGSIEETVRT--RRLRNSQE-SLS--DPTGTGSSTDSLREDQT 117  
A0A5J5DH05\_Etheostoma\_spectabile RPPALPRLSKSR--K-GVLEEAURI--RRLRNSQE-SLS--DQVETGSSTDSLKEEQT 114  
A0A484DDW2\_Perca\_flavescens RPPALPRLSKSR--K-SVSVEEAVRT--RRLRNSQE-SLS--DQVETGSSTDSLKEDQT 114  
A0A4Z2H351\_Liparis\_tanakae RPPSRPKLPKSN--RTSVSVEEAVRT--RRLRNSQE-SLS--DPVETGSSTDSLREDQT 115  
W5UJ6\_Ictalurus\_punctatus RPPPLPKPLGLAKGSRNMSFEEKKGG--RRMRSSQE-SLT--DPAEMTSSTDSLREVSN 123  
A0A5N5KDW8\_Pangasianodon\_hypophthalmus IHPCFPSSLLEWRKEVGTGRFEEKKGG--RRLRSSQE-SLT--DPAEMTSSTDSLREVS 91  
A0A3P8ZCA3\_Esox\_lucius RPPPLPKPLSVVGVKGGSTEEKVRS--RRLRNSQE-SLT--DPAEMTSSTDSLKEDS 120  
A0A4W5L9K3\_Hucho\_hucho RPPQLPKPPALSKGGTSGSV--EEVRS--RRLKHSQE-SLT--DPAETGSSTDSLKEDST 127  
A0A1S3NKU9\_Salmo\_salar RPPPLPKPPALSKGGKSGSM--EEVRS--RRLKHSQE-SLT--DPAETGSSTDSLKEDST 126  
W5L4Z3\_Astyanax\_mexicanus RPPSLPKPSGVGKGRNFSFEKTRR--RRLRSSQE-SLT--DPAETGSSTDSLRED 123  
A0A3B4C5P1\_Pygocentrus\_nattereri HPPSLPKPPTVGVKGSRNISFEKLR--RRLRNSQE-SLT--DPAETGSSTDSLREDAT 125  
H3BEM7\_Latimeria\_chalumnae KPPSKPKPPSQQGEWASSPVEINRR--RKLKISQE-NLTDVS--EISSSAEHPD-- 161  
A0A1L8F610\_Xenopus\_laevis PKPRE--RRLERAVS---LDERHWRR---RFAKASQD-SLR--DPDETGSSTDSLQEEESA 119

K7FPA9\_Pelodiscus\_sinensis  
 A0A452GIT0\_Gopherus\_agassizii  
 G3VXX0\_Sarcophilus\_harrisii  
 A0A4X2KFU4\_Vombatus\_ursinus  
 G1N6K2\_Meleagris\_gallopavo  
 F1P5J6\_Gallus\_gallus  
 U3IH52\_Anas\_platyrhynchos\_platyrhynchos  
 A0A151MFV8\_Alligator\_mississippiensis  
 A0A1U7RBH0\_Alligator\_sinensis  
 U3JGA7\_Ficedula\_albicollis  
 A0A3L8SD89\_Chloebia\_gouldiae  
 H0Z776\_Taeniopygia\_guttata  
 A0A218V5X6\_Lonchura\_striata\_domestica  
 A0A0Q3MLL4\_Amazonia\_aestiva  
 A0A1V4J6C2\_Patagioenas\_fasciata\_monilis  
 A0A210M3Z8\_Columba\_livia  
 INP5E\_Drosophila\_melanogaster

KPPRK--PRLARASS---LDEKSWRKR--RLFMSQE-NLI--DPNETSSSNGSLQETS 130  
 KPPRK--PRLARASS---LDEKSWRRR--RVFRTSQE-NLI--DPSETSSSNGSLQESS 131  
 KPPRK--PKLERTFS---LDEKGWRR---RRFKTSHE-SLT--DPNETVSSSNGSLKEVTP 125  
 KPPRK--PKLERTFS---LDEKGWRR---RRLKTSQE-SLT--DPNETGSSSNGSLREVT 125  
 RPPRK--PRLERAAS---LDEKNWKRWR--RFRTSQE-SLT--DPNETSSSNGSLQEAAL 65  
 RPPRK--PRLERAAS---LDEKNWKRWR--RFRTSQE-SLT--DPNETSSSNGSLQEAAL 130  
 PPPRK--PRLERAAS---LDEKNWRRWR--RFRTSQE-SLT--DPNETSSSNGSLQEAAL 110  
 -----  
 KPPRQ--PRLERAAS---LDEQSWRRRRRLLKTSQE-SLT--DPNETSSSNGSLQEAAL 100  
 RPPRK--PRLERAAS---LDEKSWRKRWR--RFRTSQE-SLT--DPNETSSSNGSLQEAAL 125  
 RPPRK--PRLERAAS---LDEKSWRKRWR--RFRTSQE-SLT--DPNETSSSNGSLQEAAL 107  
 RPPRK--PRLERAAS---LDEKSWRKRWR--RFRTSQE-SLT--DPNETSSSNGSLQEAAL 65  
 RPPRK--PRLERAAS---LDEKSWRKRWR--RFRTSQE-SLT--DPNETSSSNGSLQEAAL 125  
 RPPQK--PRLERAAS---LDEKSWRRWR--RFRTSQE-SLT--DPNETSSSNGSLQEAAL 130  
 RPPRK--PRLERAAS---LDEKSWRRWR--RFRTSQE-SLT--DPNETSSSNGSLQEAAL 130  
 RPPRK--PRLERAAS---LDEKSWRRWR--RFRTSQE-SLT--DPNETSSSNGSLQEAAL 130  
 PVTVR-----YNS--IPDSNSVL---RRDNLISLWSMVDNNSGSLHSSEGGSSHR--- 213

INP5E\_Homo\_sapiens  
 INP5E\_Pan\_troglodytes  
 A0A2K5K2A0\_Colobus\_angolensis\_palliatus  
 A0A2K6PYL3\_Rhinopithecus\_roxellana  
 H2PTZ0\_Pongo\_abelii  
 A0A2K6U2B2\_Saimiri\_boliviensis\_boliviensis  
 A0A2K6F2I5\_Propithecus\_coquereli  
 A0A2K6KCW3\_Rhinopithecus\_bieti  
 A0A2K5MDJ3\_Cercocebus\_atys  
 A0A2K5XR75\_Mandrillus\_leucophaeus  
 A0A0D9RTF7\_Chlorocebus\_sabaeus  
 A0A096NRS4\_Papio\_anubis  
 A0A2K5U0T2\_Macaca\_fascicularis  
 F7DRP8\_Macaca\_mulatta  
 A0A2K5PHS4\_Cebus\_capucinus\_imitator  
 A0A2K5CN95\_Aotus\_nancymae  
 A0A3Q0DNV4\_Tarsius\_syrichta  
 HOXE73\_Otolemur\_garnettii  
 I3N2L4\_Ictidomys\_tridecemlineatus  
 F7BT66\_Callithrix\_jacchus  
 A0A250Y3V1\_Castor\_canadensis  
 A0A183G993Dipodomys\_ordii  
 HOVEZ3\_Cavia\_porcellus  
 G5B6B1\_Heterocephalus\_glaber  
 A0A2Y9E841\_Trichochelus\_manatus\_latirostris  
 L5KA82\_Pteropus\_alecto  
 A0A5N4EAQ5\_Camelus\_bomediarius  
 A0A3Q2HCU7\_Equus\_caballus  
 A0A1S2ZM74\_Erinaceus\_europaeus  
 A0A3Q0DCZ7\_Mesocricetus\_auratus  
 G3I6Z4\_Cricetulus\_griseus  
 INP5E\_Rattus\_norvegicus  
 INP5E\_Mus\_musculus  
 A0A2Y9NRK2\_Delphinapterus\_leucas  
 A0A2Y9SXS0\_Physeter\_macrocephalus  
 E1BAU6\_Bos\_taurus  
 A0A4W2BWU9\_Bos\_indicus\_x\_Bos\_taurus  
 L8IYW6\_Bos\_mutus  
 A0A452DQV4\_Capra\_hircus  
 A0A5J5MJZ6\_Muntiacus\_reevesi  
 A0A5N3WU40\_Muntiacus\_muntjak  
 A0A3Q7V225\_Ursus\_arctos\_horribilis  
 A0A452Q8J6\_Ursus\_americanus  
 A0A452VEA9\_Ursus\_maritimus  
 A0A2U3ZR12\_Odobenus\_rossmarus\_divergens  
 A0A3Q7N7C7\_Callorhinus\_ursinus  
 A0A2Y9HBQ8\_Neomonachus\_schauinslandi  
 A0A485NC41\_Lynx\_pardinus  
 A0A3Q7QUW1\_Vulpes\_vulpes  
 F1PDA7\_Canis\_lupus\_familiaris  
 A0A2Y9JFT0\_Enhydra\_lutris\_kenyoni  
 M3YJ90\_Mustela\_putorius\_furo  
 I3JX61\_Oreochromis\_niloticus  
 A0A3Q4H517\_Neolamprologus\_brichardi  
 A0A3B4FRA1\_Pundamilia\_nyererei  
 A0A3P8QQM7\_Astatotilapia\_calliptera  
 W5M6X5\_Lepisosteus\_oculatus  
 A0A3B3RRU9\_Paramormyrops\_kingsleyae  
 A0A4W4HDW3\_Electrophorus\_electricus  
 A0A3Q3IZN0\_Monopterus\_albus  
 A0A3P8VEE4\_Cynoglossus\_semilaevis  
 A0A3Q1H6D9\_Anabas\_testudineus

PG-APAHSC-----SPPCLS--TSLQEIP-----KSRGVLSSER 151  
 PG-APAHSC-----SPPCLS--TSLQEIP-----KSRGVLSSER 151  
 PG-APAHSC-----SPPCLS--TSLQEIP-----KSRGVLGSE 80  
 PG-APAHSC-----SPPCLS--TSLQEIP-----KSRGVLGSE 152  
 PG-APAHSC-----SPPCLS--TSLQEIP-----KSRGVS-SER 150  
 PG-APAHSC-----SPPCLS--ASLQEIP-----KSRRAPGSE 136  
 PP-SPTPSL-----SPPCLS--TSLQEIP-----KCRRGPGSEE 149  
 LG-APLWFS-----QDPTT-----KKP-----KMPSPA-SS 92  
 PG-APAHSC-----SPPCLS--TSLQEIP-----KSRGVLGSE 151  
 -----  
 PG-APAHSC-----SPPCLS--TSLQEIP-----KSRGVLGSE 151  
 PG-APAHSC-----SPPCLS--TSLQEIP-----KSRGVLGSE 151  
 PG-APAHSC-----SPPCLS--TSLQEIP-----KSRGVLGSE 151  
 PG-APAHSC-----SPPCLS--TSLQEIP-----KSRGVLGSE 151  
 PG-APAHSC-----SPPCLS--ASLQEIP-----KSRVPGSE 145  
 PG-APAHSC-----SPPCLS--ASLQEIP-----KSRVPGSE 153  
 -----  
 PL-APAHSP-----SPPCLS--TSLQDIP-----KCPRAPSSSE 154  
 PP-GPGPQL-----PS-TLP---EHIFHLP-----GV---AAQG 150  
 PG-APAHSC-----SPPCLS--ASLQEIP-----KSRVPGSE 153  
 YG-----H-----TLPCLS--TSLQEIP-----KLPRAPSSSE 145  
 PAAAAAQDH-----PAPCLG--PSLQEV-----KARRAAGSE 97  
 PCKAPGRS-----PLPCLS--TSLQEIP-----KPRWAGSAG 154  
 APRTPARSL-----PLPCLS--TSLQEIS-----KPRAVSAG 156  
 PPEAPTCS-----LPPCLS--TSLQEIP-----ESHRA--- 133  
 TPGPPVHTC-----SPPCLS--TSLQEIP-----MTRVPGCAR 127  
 APGTPTHSG-----SPPCLS--TSLQEIP-----TTRAPCSLG 163  
 PG-PPAPSG-----PPCLS--TSLQEIP-----TSRRPP--- 160  
 PSGPSTHCG-----PLPCLS--TSLQEIP-----TSRRAPSNAG 156  
 DTQSPACSR-----PLPCLS--ASLQEIP-----KTRATGSEG 146  
 VTQFPACSR-----PLPCLS--TSLQEIP-----KTRATGSEG 146  
 VAQSPAYS-----PLPCLS--TSLQEIP-----KPRATGSEG 155  
 VAQSPAYS-----PLPCLS--TSLQEIP-----KSRATGSEG 155  
 APGTATRG-----SPPCLS--TSLQEIP-----TTRALG--S 134  
 APGTAARSG-----SPPCLS--TSLQEIP-----TTRAPG--S 119  
 VPGTPARSG-----SPPCLS--ASLQEIP-----TARRAPG--S 163  
 VPGTPARSG-----SPPCLS--ASLQEIP-----TARRAPG--S 163  
 APRTPARSG-----SPPCLS--ASLQEIP-----TARRAPG--S 163  
 APGTPARNG-----SPPCLS--TSLQEIP-----TARRAPG--S 163  
 TPRTPARSG-----SPPCLS--ASLQEIP-----TARRAPG--S 163  
 TPRTPARSG-----SPPCLS--ASLQEIP-----TARRAPG--S 163  
 VPRPPTHDT-----SPPCLS--TSLQEIP-----TSRAQGSTG 164  
 VPRPPTHDT-----SPPCLS--TSLQEIP-----TSRAQGSTG 164  
 VPRPPTHDT-----SPPCLS--TSLQEIP-----TSRAQGSTG 164  
 VPRPPTHDT-----SPPCLS--TSLQEIP-----TSRAQGSTG 135  
 VPRPPTHDT-----SPPCLS--TSLQEIP-----TSRAQGSTG 135  
 VPRPPTHDT-----SPPCLS--TSLQEIP-----TTRAQGSTG 135  
 APQPTHTG-----SPPCLS--TSLQEIP-----TSRAQGSTG 164  
 VPRPPTGPP-----SPPCLS--TSLQEIP-----TSRAQGSTG 135  
 VPRPPTGPP-----SPPCLS--TSLQEIP-----TSRAQGSTG 144  
 VLRPPTHDT-----SPPCLS--ASLQEIP-----TSRAQGSTG 164  
 VPRPPTHDT-----SPPCLS--ASLQEIP-----TSRAQGSTG 164  
 IVAPSGFVL-----QGT---AAV---RNERDPSARPHS-----AVPT 143  
 VVAPSGFVL-----QGT---AAV---RNERDPSARPHS-----AVPT 143  
 VVAPSGFVI-----QGT---AAV---RNERDPSARPHS-----AVPT 143  
 VVAPSGFVI-----QGT---AAV---RNERDPSARPHS-----AVPT 143  
 G-----H-----SLL---NSIFALQDRQASLGNQNSSTELLRLKSRNIGSSH 103  
 VLGPPAFDG-----SARSPS-----RQWSIDGSLTDT--PVSVCARDRGGSL 158  
 PPTLGSVTS-----L-----KNQGT--GGSFSD-----WVRG 145  
 VPAAGGVVL-----SDA---PAI---RNQDSNVGALS-----TDTS 144  
 VVALGAVVS-----A-T---AT---ISNQDSSVRPLS-----AAST 134  
 VSLEGGFAL-----SGS---TNL---RSQDSNVRLS-----AVAI 144

A0A4W6CEK3\_Lates\_calcarifer VAAPGGFV-----SSA----ATI---RN-RDTSVRPHS-----AVAT 144  
A0A3B4VK37\_Seriola\_dumerili VPPGGFV-----SSA----API---RN-QDSSVRPHS-----AVTT 144  
A0A3Q3GN57\_Labrus\_bergylla ALVAGTLLL-----RGA----ATI---RNSKDANRFPVS-----AVTR 145  
A0A3Q3RRU7\_9TELE\_Mastacembelus\_armatus VPAPGVAMV-----RNNHNSNRVPLS-----AVTT 138  
A0A4U5UTG8\_Collichthys\_lucidus VQAPGGLVL-----SGA----AAATSTRNEQEPDVRPLS-----SAGVT 147  
A0A3B4Z199\_Stegastes\_partitus VPPGGFV-----SGA----VAI---RNNQDSNVRFRS-----AATT 147  
A0A3Q1H1R6\_Acanthochromis\_polyacanthus VPPPGRFV-----SGD----ATV---RNSQDSSIRPRS-----AATT 152  
A0A3Q1CXU7\_Amphiprion\_ocellaris VPPDRFV-----SGD----ATV---KNSQDSSIRPRS-----AATT 145  
A0A3P8SMU2\_Amphiprion\_percula VPPDRFV-----SGD----TTV---KNSQDSSIRPRS-----AATT 148  
A0A5J5DH05\_Etheostoma\_spectabile APASGGFV-----SGA----ATI---RNDQDSNVRKLS-----AVTT 145  
A0A484DDW2\_Perca\_flavescens APAPGGFV-----SGA----ATI---RNDQDSNMRQLS-----AVTT 145  
A0A4Z2H351\_Liparis\_tanaka GPAPGGFV-----I-----RTDQDSITRPRS-----AVAT 141  
W5UJU6\_Ictalurus\_punctatus FSAPSSHMV-----L-----KNGQDAGGSNFD-----QVAV 149  
A0A5N5KDW8\_Pangasianodon\_hypophthalmus FPAPSSHMV-----L-----KNGQNSGGSHFD-----QVAV 117  
A0A3P8ZCA3\_Esox\_lucius VT--SVFTL-----SSA----SAL---RNGQSSILVPLS-----APS 148  
A0A4W5L9K3\_Hucho\_hucho VT--GVI-----TL---RNGQGSIVGPLL-----TPT 149  
A0A1S3NKU9\_Salmo\_salar VT--GVFTL-----SGA----ATL---RNGQGSIVGPLL-----TPT 154  
W5L4Z3\_Astyanax\_mexicanus PV--LSSALG-----L-----KNGQISGGIDFD-----RATR 148  
A0A3B4C5P1\_Pygocentrus\_nattereri PA--LSSALE-----L-----KNGQISGRGNFD-----QAAG 150  
H3BEM7\_Latimeria\_chalumnae -----ELV-----DLPNLDHSTKLQNGMHSQ-----LSAQS 187  
A0A1L8F610\_Xenopus\_laevis VLESAAQFTDFKQ---QNSCSQ-SLSLN----- 144  
K7FPA9\_Pelodiscus\_sinensis SPPTRSVA-----L---NG---N-EGSLHNLQDASE-----PSYYRKNK 163  
A0A452GIT0\_Gopherus\_agassizii SPLTKSRVV-----L---NG---D-QGSLHNLQDASE-----PSPYGKNK 164  
G3VXX0\_Sarcophilus\_harrisii SPPTLTLVHDGNHTSLNLCNH-STS---LQDIPE-----PKDIGNST 165  
A0A4X2KFU4\_Vombatus\_ursinus SPPTLTLVHDGNHTPHNFNSLQ-STS---LQDIPE-----PGDIGNST 165  
G1N6K2\_Meleagris\_gallopavo TSPIRGRV-----P---CCE-PNSLHSSPDASE-----ESPVGKSK 98  
F1P5J6\_Gallus\_gallus TSPIRGRAT---P---CSQCC-PNSLHSSPDASE-----ESPVGKSK 166  
U3IH52\_Anas\_platyrhynchos\_platyrhynchos SPPVRGRAT---P---CSQCC-PNSLHSSPDASE-----ASPMGKSK 146  
A0A151MFV8\_Alligator\_mississippiensis ----- 144  
A0A1U7RBH0\_Alligator\_sinensis SPPVVSRA---S---LG---T-PWHPGSLRDAVE-----TSFVGKSK 133  
U3JGA7\_Ficedula\_albicollis SPPTRGRAS---P---CNPCQ-QDSLHSSPDAL-----ASPGKSK 161  
A0A3L8SD89\_Chloebia\_gouldiae SPPTRGRAS---P---CNPCQ-QDSLHSSPDAL-----ASPGKSK 143  
H0Z776-Taeniopygia\_guttata SPPTRGRAS---P---CNPCQ-QDSLHSSPDAL-----ASPGKSK 101  
A0A218V5X6\_Lonchura\_striata\_domestica SPPTRGRAS---P---CNPCQ-QDSLHSSPDAL-----ASPGKSK 161  
A0A0Q3MLL4\_Amazona\_aestiva SPLTRGRV-----P---CHRCCH-QNSLHSSPDASE-----ASAVGKSK 166  
A0A1V4J6C2\_Patagioenas\_fasciata\_monilis SPPVRGRAS---P-----CCP-QNSLHSSQDALE-----ASVVGKSK 163  
A0A210M3Z8\_Columba\_livia SPPVRGRAS---P-----CCP-QNSLHSSQDALE-----ASAVGKSK 163  
INP5E\_Drosophila\_melanogaster -PRP-----SSECAS-----AP 224

INP5E\_Homo\_sapiens GSPS-----SGGNPLSGV-----ASSS---PNLPHRDAAVAGSSPRLPSLLPPRPPP 195  
INP5E\_Pan\_troglodytes GSPS-----SGGNPLSGV-----ASSS---PNLPHRDAAVAGSSPRLPSLLPPRPPP 195  
A0A2K5K2A0\_Colobus\_angolensis\_palliatu GSPS-----SGGNPLSGV-----ASSS---PNLLHRDAAVVGGSSRPLPSLLPPRPPP 124  
A0A2K6PY13\_Rhinopithecus\_roxellana GSPS-----SGGNPLSGV-----ASSS---PNLLHRDAAVVGGSSRPLPSLLPPRPPP 196  
H2PTZ0\_Pongo\_abelii GSPS-----SGGNPLSGS-----SS---PNLPHRDAAVAGSSPRLPSLLPPRPPP 192  
A0A2K6U2B2\_Saimiri\_boliviensis\_boliviensis GSPS-----SGSDPLSGV-----AGSA---PNLLHRDATVAGSSPRLPGLPPRPLP 180  
A0A2K6F2I5\_Propithecus\_coquereli GSPS-----SGGTCLSGV-----LSGS---LDLLHREDELCTAHSRPLAGLPPRPLP 193  
A0A2K6KCW3\_Rhinopithecus\_bieti REVG-----RGCEPALGV-----C----- 106  
A0A2K5MDJ3\_Cercocebus\_atys RSPS-----SGGNPLSGV-----ASSS---PNLLHRDAAVAGSSPRLPSLLPPRPPP 195  
A0A2K5XR75\_Mandrillus\_leucophaeus ----- 144  
A0A0D9RTF7\_Chlorocebus\_sabaeus GSRs-----SGVNPLSGV-----ASSS---PNLLHRDAAVAGSSPRLPSLLPPRPPP 195  
A0A096NRS4\_Papio\_anubis GSPS-----SGG-PLSGV-----ASSS---PNLLHRDAAVAGSSPRLPSLLPPRPPP 194  
A0A2K5U0T2\_Macaca\_fascicularis GSPS-----SGGNPLSGV-----ASSS---PNLLHRNAAVAGSSPRLPSLLPPRPPP 195  
F7DRP8\_Macaca\_mulatta GSPS-----SGGNPLSGV-----ASSS---PNLLHRNAAVAGSSPRLPSLLPPRPPP 195  
A0A2K5PHS4\_Cebus\_capucinus\_imitator GSPS-----SGSDPLSGV-----AASA---PNLLHRDATVAGSSPRLASLPPRPLP 189  
A0A2K5CN95\_Aotus\_nancymae GSPS-----SGGDPLSGV-----ASSA---PNLLHRDAAVAGSSPRLPSLLPPRPLP 197  
A0A3Q0DNV4\_Tarsius\_syrichta ----- 144  
HOXE73\_Otolemur\_garnettii GSPS-----PGRCLSGV-----LSCS---LDLLHREELCTEGSPRLASLPPRPPP 198  
I3N2L4\_Ictidomys\_tridecemlineatus GCPS-----W----- 155  
F7BT66\_Callithrix\_jacchus GGPS-----SGDPPLFGV-----ASSA---PNLLHGDATVAGSSPRLASLPPRPLP 197  
A0A250Y3V1\_Castor\_canadensis GSPS-----LWSNCLSGV-----MSTS---LDLLHREATPARSSPRLPGLRHPPSAP 189  
A0A1S3G993Dipodomys\_ordii GSPP-----GWSNRLSGV-----ASTS---LDPLHREALPTGSSPRLPGLRHPPSAP 141  
HOVEZ3\_Cavia\_porcellus GSPT-----SWGDRLSGM-----VSTS---LDLLHKEATLAGGSPRLASLHTPPRPP 198  
G5B6B1\_Heterocephalus\_glaber GSPT-----SWGRLSGR-----VSTS---LDLLHREATLAGGSPKLATLRAPHP 200  
A0A2Y9E841\_Trichechus\_manatus\_latirostris GSPS-----SWGNCLSGM-----ISTS---LDLLHREAAATGSPRLANVLPCCPLP 177  
L5KA82\_Pteropus\_alecto GSPT-----SWGNCISGM-----VSSS---PDLLPRSGASAGTPKLADVLPSPRPL 171  
A0A5N4EAQ5\_Camelus\_dromedarius GGPS-----SWGNCISGM-----ISTS---LDLLHRDGSAGSTPRLASLPPRPLP 207  
A0A3Q2HCU7\_Equus\_caballus GSPS-----LWGNCLSGM-----ISTS---LDLLHRDGAAGSTPRLAGVLPFRVVP 204  
A0A1S2ZM74\_Erinaceus\_europaeus GNPT-----SWGCLSGM-----ISTS---LDVLRDGL--VGSTPRLASMLAPRSLP 198  
A0A3Q0DCZ7\_Mesocricetus\_auratus GSPS-----LWSDCLPGM-----ISTS---LDLLHRGTSPGGGSPKLSLHDAHTPP 190  
G3I6Z4\_Cricetulus\_griseus GSPS-----VWSDCLPGM-----ISTS---LDLLHRETTPGGGSPKLSLHAAHTPP 190  
INP5E\_Rattus\_norvegicus GSPS-----LWSDCLSGM-----ISTS---LDLLHREAAAGGSPHRLASLHATHTPP 199  
INP5E\_Mus\_musculus GSPS-----LWSDCLSGM-----ISTS---LDLLHRDAASGGPSPRLASLHATHTPP 199  
A0A2Y9NRK2\_Delphinapterus\_leucas GGPS-----SLGNCLSGM-----ISTS---LDLLHRDGSAGSTPRLASLPPRPLP 178  
A0A2Y9SXS0\_Physter\_macrocephalus GGPS-----SRGNCLSGT-----ISTS---LDLLHRDGSAGSAPRLASLPPRPLP 163  
E1BAU6\_Bos\_taurus GGPS-----SWGNCISGM-----ISTS---LDLLHREGASAGSTPRLASLPPRPLP 207  
A0A4W2BWU9\_Bos\_indicus\_x\_Bos\_taurus GGPS-----SWGNCISGM-----ISTS---LDLLHREGASAGSTPRLASLPPRPLP 207  
L8IYW6\_Bos\_mutus GGPS-----SWGNCISGM-----ISTS---LDLLHREGASAGSTPRLASLPPRPLP 207  
A0A452DQV4\_Capra\_hircus GGPS-----SWGNCISGM-----ISTS---LDLLHREGASAGSTPRLASLPPRPLP 207  
A0A5J5MJZ6\_Muntiacus\_reevesi GGPS-----SWGNCISGM-----ISTS---LDLLHREGASAGSAPRLASLPPRPLP 207  
A0A5N3WU40\_Muntiacus\_muntjak GGPS-----SWGNCISGM-----ISTS---LDLLHREGASAGSAPRLASLPPRPLP 207



A0A3Q7V225 Ursus arctos horribilis GSPS-----SWGHCISGM-----LSTS----LDLLHRDRASAGSTARLPAVD----- 202  
A0A452Q8J6 Ursus americanus GSPS-----SWGHCISGM-----LSTS----LDLLHRDRASAGSTARLPAVD----- 202  
A0A452VEA9 Ursus maritimus GSPS-----SWGHCISGM-----LSTS----LDLLHRDRASAGSTARLPAVD----- 202  
A0A2U3ZR12 Odobenus rosmarus divergens GSPN-----SWGHCISGM-----IGTS----LDLLHRDAGALAGSPSRLPAVG----- 173  
A0A3Q7N7C7 Callorhinus ursinus GSPN-----SWGHCISGM-----IGTS----LDLLHRDAGALAGSPSRLPAVG----- 173  
A0A2Y9HBQ8 Neomonachus schauinslandi GSPS-----SWGHCISGM-----IGSS----LDLLHRDAGALAGSPSRLPAVG----- 173  
A0A485NC41 Lynx pardinus GGPS-----SWGHCISGM-----ISTS----LDLLHRDAGASAGSTRLPAAD----- 202  
A0A3Q7QUW1 Vulpes vulpes GSPS-----SWGHCISGM-----ISTS----LDLLHRDAGAVAGTSVRLPVPD----- 173  
F1PDA7 Canis lupus familiaris GSPS-----SWGHCISGM-----ISTS----LDLLHRDAGAVAGTSVRLPVPD----- 182  
A0A2Y9JFT0 Enhydra lutris kenyoni GSPS-----SWGHCISGM-----ISTS----LDVLRHDGASARSARLPAVD----- 202  
M3YJ90 Mustela putorius furo GSPS-----SWGHCISGM-----ISTS----LDVLRHDGASARLPAVD----- 202  
I3JX61 Oreochromis niloticus GSPA-----FRDRGSSLS--DYERRPRS--QSDLTQVQWRATKVRSLSPVQPTGFLP 191  
A0A3Q4H5I7 Neolamprologus brichardi GSPA-----FRDRGSSLS--DYERRPCS--QSDLTQVQWRAAKVRLSPVQPTGFLP 191  
A0A3B4FRA1 Pundamilia nyererei GSPA-----FRDRGSSLS--DYERRPRS--QSDLTQVQWRATKVRSLSPVQPTGFLP 191  
A0A3P8QQM7 Astatotilapia calliptera GSPA-----FRDRGSSLS--DYERRPRS--QSDLTQVQWRAAKVRLSPVQPTGFLP 191  
W5M6X5 Lepisosteus oculatus SDGP-----KRSSCHTLP-----L-----KGDTHQHIIMSSTKLSPLQHPGSL 143  
A0A3B3RRU9 Paramormyrops kingsleyae SEPDKK-----SFKSCE-----PISNSAASSKIRLSPVQPTGFLP 193  
A0A4W4HDW3 Electrophorus electricus ESPP-----FRDRCSLPG--EDE-CLH--GGCCLAGNPKPKSKIILSPLQPIGAFP 192  
A0A3Q3I2N0 Monopterus albus VSPV-----FRDRGNLS--ECESRPHS--QSDPTDHRVPRNVKVRSLSPVQPTGFLP 192  
A0A3P8VEE4 Cynoglossus semilaevis RQSA-----FRNRGSSLS--EVGRRPRS--QSDLTEHGMRISKLCLSPVQPTGFLP 182  
A0A3Q1H6D9 Anabas testudineus GSPV-----LRDRGSSFS--EDERRPHS--QSDPTDNWMMSTKVHLSVQVVGFLP 192  
A0A4W6CEK3 Lates calcarifer GSPV-----FRERGSSLS--EYERRPHS--QSDPTDHRGRSTKQRLSPVQPTGFLP 192  
A0A3B4VK37 Seriola dumerili GSPV-----FRERGSSLS--EYERRPHS--QSDPTDHRMRSAKVRSLSPVQPTGFLP 192  
A0A3Q3GNS7 Labrus bergylta GSPV-----FRDRGRSLS--EYERRPTS--QSDPVDHLVRPAKVRSLSPVQPTGFLP 193  
A0A3Q3RRU7 9TELE Mastacembelus armatus RSPG-----FRDRGNLS--EFESRPCS--QSDPIQWVRSRTRKVRSLSPVQPTGFLP 186  
A0A4U5UTG8 Collichthys lucidus RQSA-----FRDRGSSLS--EYEMRPPS--QSDPTDHRARSKVRSLSPVQPTGFLP 195  
A0A3B4ZI99 Stegastes partitus GSPV-----FRDRGSSLS--EYERRPRS--QSDNPTDHRGRSAKLRSLSPVQPTGFLP 195  
A0A3Q1HI1R6 Acanthochromis polyacanthus GSPV-----FRDRGSSLS--EYERRPRS--QSDPTEHRGRSAKLRSLSPVQPTGFLP 200  
A0A3Q1CXU7 Amphiprion ocellaris GSPV-----FRDRGSSLS--EYERRPRS--QSDPTDHRERSAKLRSLSPVQPTGFLP 193  
A0A3P8SMU2 Amphiprion percula GSPV-----FRDRGSSLS--EYERRPRS--QSDPTDHRERSTKLRSLSPVQPTGFLP 196  
A0A5J5DH05 Etheostoma spectabile GSPV-----FRDRGRSLS--EYERRPTS----- 196  
QSDPTDHRVRSKVRSLSPVQPTGFLP 193  
A0A484DDW2 Perca flavescens GSPV-----FRDRGRSLS--EYERRPTS--QSDPTDHRARSSKVRSLSPVQPTGFLP 193  
A0A4Z2H351 Liparis tanakae GSPV-----SRDRGSSLSDEYETRPHS--QSDPTDHRARPARPRSLSPVQPTGFLP 191  
W5UJG6 Ictalurus punctatus QSPF-----FWRDCNSFPE--DDR-CLS--GGHFGSQHPKPSKIILSPLQAGTFF 196  
A0A5N5KDW8 Pangasianodon hypophthalmus QSPF-----FRDRCSFPE--EDR-CPP--GGHFGSQHPKPSKIILSPLQAGAFP 164  
A0A3P8ZCA3 Esox lucius RSPV-----FRARGQSL--EYERTSQD--HHRDDAEQRVWSSKVRSLSPVQPTGFLP 196  
A0A4W5L9K3 Hucho hucho GSPV-----FRARGQSL--EYERRPHD--HGDPAEQGRPRFVKVRSLSPVQPTGFLP 197  
A0A1S3NKU9 Salmo salar GSPV-----FRARGQSL--EYERRPHD--HGDPAEQGRPRFVKVRSLSPVQPTGFLP 202  
W5L4Z3 Astyanax mexicanus ESPP-----FRDRCSLPE--ADK-HPS--RQSRVLELRAKPSKIILSPLQPTGSPF 195  
A0A3B4C5P1 Pygocentrus nattereri ESPP-----FRERCSLPE--ADK-HPR--GQSRVLELRAKPSKIILSPLQAGTFF 197  
H3BEM7 Latimeria chalumnae GRPNCEVQQTGRNSSSNKS--DSENQDYS--RHSAAKGVKSPKAKSKLPTVTTPTQPLP 242  
A0A1L8F610 Xenopus laevis -----PMK-----PGIVLVGYPGNSSPSRSLSPVQPTGFLP 174  
K7FPA9 Pelodiscus sinensis SSIS-----ESEKQVSEVPTA--SVGFMQKESGSKSRSLSPVQPTGFLP 206  
A0A452GIT0 Gopherus agassizii SSIS-----DSKQVSEVPGV--SVGLMQRKESLGSKPRCLKITPPRPLP 207  
G3VXX0 Sarcophilus harrisii NPPS-----SLEIIPSTVSKG--SLELVGVTASGNKPRFSKILPPLALP 208  
A0A4X2KFU4 Vombatus ursinus DPPS-----SLEIIPPTVTS--SLELLHGVTASWNLKLRSLSPVQPTGFLP 208  
G1N6K2 Meleagris gallopavo GSTS-----DLGKRAEISSA--FGLLLRGKAFAGSKPRLSQIMPAPRPLP 141  
F1P5J6 Gallus gallus GSTS-----DLGKRAEISSA--FGLLLRGKAFAGSKPRLSQIMPAPRPLP 209  
U3IH52 Anas platyrhynchos platyrhynchos GSTS-----DLGKRAEISSA--FGLLLRGKAFAGSKPRLSQIMPAPRPLP 189  
A0A151MFV8 Alligator mississippiensis -----PMK-----PGIVLVGYPGNSSPSRSLSPVQPTGFLP 174  
A0A1U7RBH0 Alligator sinensis GSGS-----DSEKE-----AFEQKALSGGKPRLPQIAPPALP 167  
U3JGA7 Ficedula albicollis GGAS-----DLGKRAEISSA--FGLLLRGKGFAGGKPRLSQIMPAPRPLP 204  
A0A3L8SD89 Chloebia gouldiae AGTS-----DLGKRAEISSA--FGLLLRGKGFAGGKPRLSQIMPAPRPLP 186  
H0Z776 Taeniopygia guttata AGTS-----DLGKRAEISSA--FGLLLRGKGFAGGKPRLSQIMPAPRPLP 144  
A0A218V5X6 Lonchura striata domestica AGTS-----DLGKRAEISSA--FGLLLRGKGFAGGKPRLSQIMPAPRPLP 204  
A0A0Q3MLL4 Amazona aestiva GSPS-----DLGKRAEISSA--FGLLLRGKAFAGSKPRLSQVMPAPRPLP 209  
A0A1V4J6C2 Patagioenas fasciata monilis GGTS-----DLGKRAEISSA--FGLLLRGKAFAGGKPRLSQITVPRPLP 206  
A0A210M3Z8 Columba livia GGTS-----DLGKRAEISSA--FGLLLRGKAFAGGKPRLSQITVPRPLP 206  
INP5E Drosophila melanogaster ESPV--ASKTFFAHCSFAAASAVARSESLQNRSPIRPMVAVSACRSRLRLKLYPPGQELP 282

INP5E Homo sapiens ALS--LDIASDSLRTANK--VDS-D--LADYKLRAPLLV--RAHSSLGPRGRPRS-- 241  
INP5E Pan troglodytes ALS--LDIASDSLRTANK--VDS-D--LADYKLRAPLLV--RAHSSLGPRGRPRS-- 241  
A0A2K5K2A0 Colobus angolensis palliatus ALS--LDIASDSLRTANK--VDS-D--LADYKLRAPLLV--RAHSSLVGRGRPRS-- 170  
A0A2K6PY13 Rhinopithecus roxellana ALS--LDIASDSLRTANK--VDS-D--LADYKLRAPLLV--RAHSSLVGRGRPRS-- 242  
H2PTZ0 Pongo abelii ALS--LDIASDSLRTANK--VDS-D--LADYKLRAPLLV--RAHSSLGPRGRPRS-- 238  
A0A2K6U2B2 Saimiri boliviensis boliviensis ALG--LDIASDSLRTANK--VDP-E--LADYKLRAPRLV--RAHSSLGPRGRPRS-- 226  
A0A2K6F2I5 Propithecus coquereli AMD--LDITSSSLRTANK--VDS-D--HADYKLRMQTRLV--RAHSSLGPRGRPRS-- 239  
A0A2K6KCW3 Rhinopithecus bieti -----AARSGPVFL--ESRQQR--RRVQ-- 125  
A0A2K5MDJ3 Cercocebus atys ALS--LDIASDSLRTANK--VDS-D--LADYKLRAPLLV--RAHSSLGPRGRPRS-- 241  
A0A2K5XR75 Mandrillus leucophaeus -----PMK-----PGIVLVGYPGNSSPSRSLSPVQPTGFLP 174  
A0A0D9RTF7 Chlorocebus sabaeus ALS--LDIASDSLRTANK--VDS-D--LAGYKLRAPLLV--RAHSSLGPRGRPRS-- 241  
A0A096NRS4 Papio anubis ALS--LDIASDSLRTANK--VDS-D--LADYKLRAPLLV--RAHSSLGPRGRPRS-- 240  
A0A2K5U0T2 Macaca fascicularis ALS--LDIASDSLRTANK--VDS-D--LADYKLRAPLLV--RAHSSLGPRGRPRS-- 241  
F7DRP8 Macaca mulatta ALS--LDIASDSLRTANK--VDS-D--LADYKLRAPLLV--RAHSSLGPRGRPRS-- 241  
A0A2K5PHS4 Cebus capucinus imitator ALG--LDIASDSLRTANK--VDP-D--LADYKLRAPRLV--RAHSSLGPRGRPRS-- 235  
A0A2K5CN95 Aotus nancymae ALG--LDIASDSLRTANK--VDP-D--LADYKLRAPRLV--RAHSSLVGRGRPRS-- 243  
A0A3Q0DNV4 Tarsius syrichta -----PMK-----PGIVLVGYPGNSSPSRSLSPVQPTGFLP 174  
H0XE73 Otolemur garnettii AMD--LDVTSNSLRTANK--VDT-D--HADYKRRVQTRLV--RAHSSLGPRGRPRS-- 244  
I3N2L4 Ictidomys tridecemlineatus -----ELP--EAGH--PPGQPRPS-- 170

F7BT66 *Callithrix jacchus* ALG--LDIASDSLRTANK---VDP-D---LADYKLRAPRLV---RAHSSLGPARPRS-- 243  
A0A250Y3V1 *Castor canadensis* PID--LNVASDSLRTASK---VDS-E---YADHKLRIQTRLV---RANSSLGPRGRSQS-- 235  
A0A1S3G993 *Dipodomys ordii* ASD---HRAASDPASAAND---IDS-E---HADRRKPRQSKLV---RAHSSLGTCRPRS-- 187  
HOVEZ3 *Cavia porcellus* SE---PAMASDTLRTASR---LDS-E---QGDRKQGTPTRLV---RTHSSLGPRGRPS-- 243  
G5B6B1 *Heterocephalus glaber* SSEPTMTMASEALRTASQ---VDS-E---QADREQGTPTRLF---RAHSSLGSPQPS-- 248  
A0A2Y9E841 *Trichechus manatus latirostris* AMD--LSVSSDSLRTMANK---VDP-D---REDFRRRVQ-KLV---RAHSSLGSRPRS-- 222  
L5KA82 *Pteropus alecto* AID--WNWTSDSLRTTHR---VDA-D---HADYKLRQLQTRLF---GAHSSLGPRGRPS-- 217  
A0A5N4EAQ5 *Camelus dromedarius* AMD--QNVASNALRTANK---VDS-D---HADYKLRQLQARLF---RAHSSLGPRGRPS-- 253  
A0A3Q2HCU7 *Equus caballus* AME--QAVVSHSLRTANK---VDE-D---HADYKLRQLQTRLF---RAHSSLGPRGRPS-- 250  
A0A1S2ZM74 *Erinaceus europaeus* AMD--LNVWTSDSLRTANK---VDA-N---HADYKLRQLQARLF---RAHSSLGPLGPS-- 244  
A0A3Q0DCZ7 *Mesocricetus auratus* AMD--LNIASNSLRTANK---VDP-E---HADYKLRMQTRLV---RAHSSLGSRPRS-- 236  
G3I6Z4 *Cricetulus griseus* AMD--LNIASNSLRTANK---VDP-E---HADYKLRMQTRLV---RAHSSLGSRPRS-- 236  
INP5E *Rattus norvegicus* AMD--LNIASNSLRTANK---VDP-E---HTDYKLRMQNRLV---RAHSSLGSRPRS-- 245  
INP5E *Mus musculus* AMD--LNIASNSLRTANK---VDP-E---HTDYKLRMQTRLV---RAHSSLGSRPRS-- 245  
A0A2Y9NRK2 *Delphinapterus leucas* AMD--WNVASDALRTANK---VDL-D---HADYKLRMQARPF---RAHSSLRPGRPRS-- 224  
A0A2Y9SXS0 *Physeter macrocephalus* AMD--WNVASDALRTANK---VGW-G---HADYQVRRQAGLF---RAHSSLGPRGRPS-- 209  
E1BAU6 *Bos taurus* AMA--RNMVASEGLRTANK---VDP-D---HADYKLRQLQARLF---RAHSSLGPRGRPS-- 253  
A0A4W2BWU9 *Bos indicus x Bos taurus* AMA--RNMASEGLRTANK---VDP-D---HADYKLRQLQARLF---RAHSSLGPRGRPS-- 253  
L8IYW6 *Bos mutus* AMA--RNMASEGLRTANK---VDP-D---HADYKLRQLQARLF---RAHSSLGPRGRPS-- 253  
A0A452DQV4 *Capra hircus* AMA--RNVASEGLRTANK---VDP-D---HADYKLRQLQARLF---RAHSSLGPRGRPS-- 253  
A0A5J5MJZ6 *Muntiacus reevesi* AMG--RNVASEGLRTANK---VDP-D---HADYKLRQLQARLF---RVHSSLGPRGRPS-- 253  
A0A5N3WU40 *Muntiacus muntjak* AMG--RNVASEGLRTANK---VDP-D---HADYKLRQLQARLF---RVHSSLGPRGRPS-- 253  
A0A3Q7V225 *Ursus arctos horribilis* ----KQVASHSLRSADR---VDP-G---QADCKSRQLQSRL---RAHSSLGPRGRPS-- 245  
A0A452Q8J6 *Ursus americanus* ----KQVASHSLRSADR---VDP-G---QADCKSRQLQSRL---RAHSSLGPRGRPS-- 245  
A0A452VEA9 *Ursus maritimus* ----KQVASHSLRSADR---VDP-G---QADCKSRQLQSRL---RAHSSLGPRGRPS-- 245  
A0A2U3ZR12 *Odobenus rosmarus divergens* ----KQVASHSLRSADR---VDS-V---PTDCKSRQLQSRL---RAHSSLGPRGRPS-- 216  
A0A3Q7N7C7 *Callorhinus ursinus* ----KQVASHSLRSADR---VDS-V---PTDCKSRQLQSRL---RAHSSLGPRGRPS-- 216  
A0A2Y9HBQ8 *Neomonachus schauinslandi* ----KQVASHSLRSADR---VDL-V---QTDCKPRLQSRL---RAHSSLGPRGRPS-- 216  
A0A485NC41 *Lynx pardinus* ----KQVASHSLRTAN---PTGKSRLQSRL---RAHSSLGPRGRPS-- 239  
A0A3Q7QUW1 *Vulpes vulpes* ----PKVAPESLRPTH---VDS-G---PADGKPHLQSRL---RAHSSLGPRGRPS-- 216  
F1PDA7 *Canis lupus familiaris* ----PKVAPESLRPTH---VDS-G---PVDGKPHLQSRL---RAHSSLGPRGRPS-- 225  
A0A2Y9JFT0 *Enhydra lutris kenyoni* ----KQVASHSLRPADR---VDS-G---QADLKARLPSRLF---RAHSSLGPRGRPS-- 245  
M3YJ90 *Mustela putorius furo* ----KQVASHSLRPADR---VDS-G---QADLKARLPSRLF---RAHSSLGPRGRPS-- 245  
I3JX61 *Oreochromis niloticus* ALE--KSFASATLRAANR---IDR-D---CLDYAMPAREKLG---LHRNLSDSRLE-- 238  
A0A3Q4H517 *Neolamprologus brichardi* ALE--KSFASATLRAANR---IDR-D---CLDYAMPAREKLG---LHRNLSDSRLE-- 238  
A0A3B4FRA1 *Pundamilia nyererei* ALE--KSFASATLRAANR---IDR-D---CLDYAMPAREKLG---LHRNLSDSRLE-- 238  
A0A3P8QQM7 *Astatotilapia calliptera* ALE--KSFASATLRAANR---IDR-D---CLDYAMPAREKLG---LHRNLSDSRLE-- 238  
W5M6X5 *Lepisosteus oculatus* PVG--WFMASNTSLRTANR---IDQ-D---CVDYAVIGKRGYE---RQHSSLSYRLLD-- 189  
A0A3B3RRU9 *Paramormyrops kingsleyae* AVE--LCTASTSLRTANR---IDR-D---CVDYGDTRRAGPE---RLHRNLSDSRLE-- 239  
A0A4W4HDW3 *Electrophorus electricus* PLE--NSITSLSLRSTNR---IDR-D---CLDYGRG---SPAER---LHRNFSDSLLD-- 236  
A0A3Q3I2N0 *Monopterus albus* ALE--KMFMSANLGAANR---IDR-D---CLDNAELA---SGDR---RHRNLSDSRLE-- 236  
A0A3P8VEE4 *Cynoglossus semilaevis* ALE--KSFVSAITKAAKR---IDR-D---CLDYAVLAREKLG---LHRNLSDSRLE-- 229  
A0A3Q1H6D9 *Anabas testudineus* ALE--KTFVSAITLRAANR---IDK-D---CLDYAVLHRENKLG---LHRNLSDSRLE-- 239  
A0A4W6CEK3 *Lates calcarifer* ALE--KSFASATLRAANR---IDR-D---CLDYGVLAREKLRER---LHRNLSDSRLE-- 239  
A0A3B4VK37 *Seriola dumerili* TLE--KSFVSAITLRAANR---IDR-D---CLDYAALAKENLGER---LHRNLSDSRLE-- 239  
A0A3Q3GNS7 *Labrus bergylta* ALE--KSFATLRAANR---IDR-D---CLDYAVLAREKHGER---LHRNLSDSRLE-- 238  
A0A3Q3RRU7 *9TELE Mastacembelus armatus* ALE--KSFASATLRAANR---IDR-D---CLDYVSLAKEKLG---LHRNLSDSRLE-- 233  
A0A4U5UTG8 *Collichthys lucidus* ALE--KSFASATLRAANR---IDR-D---CLDYAVLAREKLG---LHRNLSDSRLE-- 242  
A0A3B4ZI99 *Stegastes partitus* ALE--KSFASATLRAANR---IDR-D---CLDYAVLAREKLG---LHRNLSDSRLE-- 242  
A0A3Q1H1R6 *Acanthochromis polyacanthus* ALE--KSFASATLRAANR---IDR-D---CLDYAVLAREKLG---LHRNLSDSRLE-- 247  
A0A3Q1CXU7 *Amphiprion ocellaris* ALE--RSFASATLRAANR---IDR-D---CLDYAVLAREKLG---LHRNLSDSRLE-- 240  
A0A3P8SMU2 *Amphiprion percula* ALE--RSFASATLRAANR---IDR-D---CLDYAVLAREKLG---LHRNLSDSRLE-- 243  
A0A5J5DH05 *Etheostoma spectabile* ALG--KSFASATLRAANR---IDG-D---CLDYAMMAREKLG---LHRNLSDSRLE-- 240  
A0A484DW2 *Perca flavescens* ALG--KSFASATLRAANR---IDG-D---CLDYAMMAREKLG---LHRNLSDSRLE-- 240  
A0A4Z2H351 *Liparis tanakae* PLE--KSFASATLRAANR---IDR-D---RVDYAVLAREKVG---LHRNLSDSRLLD-- 238  
W5UJ6 *Ictalurus punctatus* ALE--YSIAASMLRTANQ---IDR-D---CLDYRNG---SLQEK---LQKNTLDSQLWD-- 240  
A0A5N5KDW8 *Pangasianodon hypophthalmus* PLE--YSIASMSLRTANQ---IDR-D---CLDYRNG---SLQEK---LQKNTLDSQLWD-- 208  
A0A3P8ZCA3 *Esox lucius* ALE--QSLESVSLRTANR---IDR-D---CLDYGILPGKAGPERLHLHRNLSDSRLE-- 245  
A0A4W5L9K3 *Hucho hucho* ALE--QTLASESLRTANR---IDR-D---CVDYGI VPRGRAGPERLHLHRNLSDSRLLD-- 246  
A0A1S3NKU9 *Salmo salar* ALE--QTLASESLRTANR---IDR-D---CVDYGI VPRGRAGPERLHLHRNLSDSRLLD-- 251  
W5L4Z3 *Astyanax mexicanus* PLD--YVAVASMSLRTANR---IDR-D---CLDYGKR---GLPER---LHRNFSDSRLD-- 239  
A0A3B4C5P1 *Pygocentrus nattereri* FVE--YVAVASMSLRTANR---IDR-D---CLDYGKR---GLTER---LHRNFSDSRLD-- 241  
H3BEM7 *Latimeria chalumnae* PLD--MQATSHVLRRTN---IDQ-D---CMDYAQTOASRFA---RQRRLSDGKGLDQ-- 288  
A0A1I8F610 *Xenopus laevis* QIE--MNVTSRALRTANR---IDP-D---YMDYKEASSQLRCLR---QSSSLSDTRLHNS-- 223  
K7FPA9 *Pelodiscus sinensis* PLE--LSMASHVLRRTANR---IDS-D---YMDYQHSQSRFERV---SSLSGDRGLHNS-- 253  
A0A452GIT0 *Gopherus agassizii* PLE--LSVASHVLRRTANR---IDS-D---YMDYQHSQSRFERL---SSLSGDTGLHNS-- 254  
G3VXX0 *Sarcophilus harrisii* PLE--LNVASETLRTANK---IDP-D---YVNYKHHQSKLLRP---DSSLSDTRLHNS-- 254  
A0A4X2KFU4 *Vombatus ursinus* PLE--LNVASETLRTANK---IDP-D---YVNYKHHQSKLLRP---DSSLSDTRLHNS-- 254  
G1N6K2 *Meleagris gallopavo* PME--LNVASHTLRTANK---IDP-D---LMDYRHSYQHKFGRV---SNLSDTTRLHGN-- 188  
F1P5J6 *Gallus gallus* PME--LNVASHTLRTANK---IDP-D---LMDYRHSYQHKFGRV---SNLSDTTRLHGN-- 256  
U3IH52 *Anas platyrhynchos platyrhynchos* PME--LNVASHTLRTANK---IDS-D---FMDYRHSYQHKFGRV---SSLSDTTRLHGN-- 236  
A0A151MFV8 *Alligator mississippiensis* -ME--IDVVSALRTAHR---IDS-D---CTDYWRGSGSKLVQ---SGGSLSDTRLHGS-- 47  
A0A1U7RBH0 *Alligator sinensis* PME--IDVVSALRTAHR---IDS-D---CTDYWRGSGSKLVQ---SGGSLSDTRLHGS-- 215  
U3JGA7 *Ficedula albicollis* PME--LNVASHSLRTANR---IDS-D---CLDYRHSYQHKFGRV---SSLSDSRQLQGN-- 251  
A0A3L8SD89 *Chloebia gouldiae* PME--LNVASHSLRTANR---IDS-D---CLDYRHSYQHKFGRV---SSLSDSRQLQGN-- 233  
HOZ776 *Taeniopygia guttata* PME--LNVASHSLRTANR---IDS-D---CLDYRHSYQHKFGRV---SSLSDSRQLQGN-- 191  
A0A218V5X6 *Lonchura striata domestica* PME--LNAASHSLRTANR---IDS-D---CLDYRHSYQHKFGRV---SSLSDSRQLQGN-- 251  
A0A0Q3MLL4 *Amazona aestiva* PLE--LSVASHLLRTANR---IDS-D---CLDYRQCSQHKFGRV---SSLSDTTRLHGN-- 256  
A0A1V4J6C2 *Patagonia fasciata monilis* PLE--LNVASHTLRTANR---IDS-D---CMDYRYSYQHKFGRV---SSLSDTTRLHGN-- 253  
A0A210M3Z8 *Columba livia* PLE--LNVASHTLRTANR---IDS-D---CMDYRYSYQHKFGRV---SSLSDTTRLHGN-- 253  
INP5E *Drosophila melanogaster* PLQA--ATEPGDIKRAITPQHMSNPNIATQPDGIEHIEEQPGVRFMSHENMTRLQRQGS-- 338

|                                            |                                              |            |     |
|--------------------------------------------|----------------------------------------------|------------|-----|
| INP5E_Homo_sapiens                         | --PLACDDCSLRSKSS---FSLLP-----IRSKDVRSSR      | YLBGSLASG  | 286 |
| INP5E_Pan_troglodytes                      | --PLACDDCSLRSKSS---FSLLP-----IRSKDVRSSR      | YLBGSLASG  | 286 |
| A0A2K5K2A0_Colobus_angolensis_palliatus    | --PLACDDCSLRSKSS---FSLLP-----IRSKDVRSSR      | YLBGSLASG  | 215 |
| A0A2K6PY13_Rhinopithecus_roxellana         | --PLACDDCSLRSKSS---FSLLP-----IRSKDVRSSR      | YLBGSLASG  | 287 |
| H2PTZ0_Pongo_abelii                        | --PLACDDCSLRSKSS---FSLLP-----IRSKDVRSSR      | YLBGSLASG  | 283 |
| A0A2K6U2B2_Saimiri_boliviensis_boliviensis | --PLACDDCSLRSARSS---FSLLP-----IRTKDVRSSR     | YLBGSLASG  | 271 |
| A0A2K6F2I5_Propithecus_coquereli           | --PLACDSCSLRSKSA---FSLLP-----IRTKDVRSSR      | YLBGSLASG  | 284 |
| A0A2K6KCW3_Rhinopithecus_bieti             | --ESPCSGLGAASD-IL---WVLLLSLGTWPRPPRDLGSSRRHS | YLBGSLASG  | 179 |
| A0A2K5MDJ3_Cercocebus_atys                 | --PLACDDCSLRSKSA---FSLLP-----AP-IRSKDVRSSR   | YLBGSLASG  | 285 |
| A0A2K5XR75_Mandrillus_leucophaeus          | -----MGLES                                   | YLBGSLASG  | 19  |
| A0A0D9RTF7_Chlorocebus_sabaeus             | --PLACDDYSLRSKSS---FSLLP-----AP-IRSKDVRSSR   | YLBGSLASG  | 286 |
| A0A096NRS4_Papio_anubis                    | --PLACDDCSLRSKSS---FSLLP-----AP-IRSKDVRSSR   | YLBGSLASG  | 285 |
| A0A2K5U0T2_Macaca_fascicularis             | --PLACDDCSLRSKSS---FSLLP-----AP-IRSKDVRSSR   | YLBGSLASG  | 286 |
| F7DRP8_Macaca_mulatta                      | --PLACDDCSLRSKSS---FSLLP-----AP-IRSKDVRSSR   | YLBGSLASG  | 286 |
| A0A2K5PHS4_Cebus_capucinus_imitator        | --PLACDDCSLRSKSP---FSLLP-----IRTKDVRSSR      | YLBGSLASG  | 280 |
| A0A2K5CN95_Aotus_nancymaae                 | --PLACDDCSLRSKSS---FSLLP-----IRTKDVRSSR      | YLBGSLASG  | 288 |
| A0A3Q0DNV4_Tarsius_syrichta                | -----YLBGSLASG                               | 286        | 15  |
| HOXE73_Otolemur_garnettii                  | --PLACDSCSLRSANSA---FSLLP-----IRTKDVRSSR     | YLBGSLASG  | 289 |
| I3N2L4_Ictidomys_tridecemlineatus          | --PLACDDCSLRSKSF---FSLLP-----IRTKDVRSSR      | YLBGSLASG  | 215 |
| F7BT66_Callithrix_jacchus                  | --PLACDDCSLRSKSS---FSLLP-----IRTKDVRSSR      | YLBGSLASG  | 288 |
| A0A250Y3V1_Castor_canadensis               | --PLACDNHSLRSKSS---FSLLP-----IRTKDVRSSR      | YLBGSLASG  | 280 |
| A0A1S3G993Dipodomys_ordii                  | --PLACDDHPLHARS---FSLLP-----IRTKDIRSSR       | YLBGSLASG  | 232 |
| HOVEZ3_Cavia_porcellus                     | --PLTCDDHSLHARS---FSLLP-----IRTKDVRSSR       | YLBGSLASG  | 288 |
| G5B6B1_Heterocephalus_glaber               | --PLACDDHSLHARS---FSLLP-----IRTKDVRSSR       | YLBGSLASG  | 292 |
| A0A2Y9E841_Trichechus_manatus_latirostris  | --PLACDSCSLRSKSS---FSLLP-----IRANDVRSR       | YLBGSLASG  | 267 |
| L5KA82_Pteropus_alecto                     | --PLACDDCSLRSKSS---FSLLP-----IRAKDVRSSR      | YLBGSLASG  | 262 |
| A0A5N4EAQ5_Camelus_dromedarius             | --PLANDDCSLHARS---FSLLP-----IRAKDVRSSR       | YLBGSLASG  | 298 |
| A0A3Q2HCU7_Equus_caballus                  | --PLACDNCSLRSKSS---FSLLP-----IRTKDVRSSR      | YLBGSLASG  | 295 |
| A0A1S2ZM74_Erinaceus_europaeus             | --PLSFDNCSLRSKSS---FSLLP-----IRAKDVRSSR      | YLBGSLASG  | 289 |
| A0A3Q0DCZ7_Mesocricetus_auratus            | --PLAGDDHSLHARS---FSLLP-----IRTKDIRSSR       | YLBGSLASG  | 281 |
| G3I6Z4_Cricetulus_griseus                  | --PLAGDDHSLHARS---FSLLP-----IRTKDIRSSR       | YLBGSLASG  | 281 |
| INP5E_Rattus_norvegicus                    | --PLAGDDHSLHARS---FSLLP-----IRTKDIRSSR       | YLBGSLASG  | 290 |
| INP5E_Mus_musculus                         | --PLAGDDHSLHARS---FSLLP-----IRTKDIRSSR       | YLBGSLASG  | 289 |
| A0A2Y9NRK2_Delphinapterus_leucas           | --PLARDDCSLHARS---VSLLP-----VRTKDVRSSR       | YLBGSLASG  | 269 |
| A0A2Y9SXS0_Physeter_macrocephalus          | --PLARDDCSLRPATST---FSLLP-----IRTKDVRGRS     | YLBGSLASG  | 254 |
| E1BAU6_Bos_taurus                          | --PLAYDDCSLHSSRST---FSLLP-----IRAKDVRSSR     | YLBGSLATG  | 298 |
| A0A4W2BWU9_Bos_indicus_x_Bos_taurus        | --PLAYDDCSLHSSRST---FSLLP-----IRAKDVRSSR     | YLBGSLATG  | 298 |
| L8IYW6_Bos_mutus                           | --PLAYDDCSLHSSRST---FSLLP-----IRAKDVRSSR     | YLBGSLATG  | 298 |
| A0A452DQV4_Capra_hircus                    | --PLAYDDCSLHSSRST---FSLLP-----IRAKDVRSSR     | YLBGSLASG  | 298 |
| A0A5J5MJZ6_Muntiacus_reevesi               | --PLACDDCSLHSSRST---FSLLP-----IRAKDVRSSR     | YLBGSLASG  | 298 |
| A0A5N3WU40_Muntiacus_muntjak               | --PLACDDCSLHSSRST---FSLLP-----IRAKDVRSSR     | YLBGSLASG  | 298 |
| A0A3Q7V225_Ursus_arctos_horribilis         | --PLACDA-----KSS---FSLLP-----IRTKDVRSSR      | YLBGSLASG  | 284 |
| A0A452Q8J6_Ursus_americanus                | --PLACDA-----KSS---FSLLP-----IRTKDVRSSR      | YLBGSLASG  | 284 |
| A0A452VEA9_Ursus_maritimus                 | --PLACDA-----KSS---FSLLP-----IRTKDVRSSR      | YLBGSLASG  | 284 |
| A0A2U3ZR12_Odobenus_rosmarus_divergens     | --PLACDA-----K-S---FSLLP-----IRAKDVRSSR      | YLBGSLASG  | 254 |
| A0A3Q7N7C7_Callorhinus_ursinus             | --PLACDA-----K-S---FSLLP-----IRAKDVRSSR      | YLBGSLASG  | 254 |
| A0A2Y9HBQ8_Neomonachus_schauinslandi       | --PLACDA-----KSS---FSLLP-----IRAKDVRSSR      | YLBGSLASG  | 255 |
| A0A485NC41_Lynx_pardinus                   | --PLACDA-----KPS---FSLLP-----IRAKDVRSSR      | YLBGSLASG  | 278 |
| A0A3Q7QUW1_Vulpes_vulpes                   | --PLVCEA-----RSS---FSLLP-----IRAKDVRSSR      | YLBGSLASG  | 255 |
| F1PDA7_Canis_lupus_familiaris              | --PLVCEA-----RSS---FSLLP-----IRAKDVRSSR      | YLBGSLASG  | 264 |
| A0A2Y9JFT0_Enhydra_lutris_kenyoni          | --PLASEA-----RSS---FSLLP-----IRAKDVRTR       | YLBGSLASG  | 284 |
| M3YJ90_Mustela_putorius_furo               | --PLASEA-----RSS---FSLLP-----IRAKDVRTR       | YLBGSLASG  | 284 |
| I3JX61_Oreochromis_niloticus               | --NMGSDSASVNSMRST---YSVLSP-----IRPQDMNR      | FMEGSLGSG  | 283 |
| A0A3Q4H5I7_Neolamplogus_brichardi          | --NMGSDSASVNSMRST---YSVLSP-----IRPQDMNR      | FMEGSLGSG  | 283 |
| A0A3B4FRA1_Pundamilia_neyereii             | --NMGSDSASVNSMRST---YSVLSP-----IRPQDMNR      | FMEGSLGSG  | 283 |
| A0A3P8QQM7_Astatotilapia_calliptera        | --NMGSDSASVNSMRST---YSVLSP-----IRPQDMNR      | FMEGSLGSG  | 283 |
| W5M6X5_Lepisosteus_oculatus                | --SMVSDNTSLSSMKST---LSVLNP-----IRPKDVRNR     | FLBGSVLGHG | 234 |
| A0A3B3RRU9_Paramomyrops_kingsleyae         | --TMVSDNTSLNSMKST---SSVLNP-----IRPRDVRNR     | FLBGSVLGHG | 284 |
| A0A4W4HDW3_Electrophorus_electricus        | --TMVLDSTSVNSMKST---LSALNP-----IRPKDVRNR     | FLBGSVLGSG | 281 |
| A0A3Q3IZN0_Monopterus_albus                | --NMGSDSASVNSLRST---YSVLSP-----IRPQDVRNR     | FLBGSVLGRG | 281 |
| A0A3P8VEE4_Cynoglossus_semilaevis          | --NMGSDNASVNSLRST---YSVLSP-----IRPQDVRNR     | FLBGSVLGSG | 274 |
| A0A3Q1H6D9_Anabas_testudineus              | --NMGSDSASVNSLRST---YSVLSP-----IRPQDVRNR     | FLBGSVLGSG | 284 |
| A0A4W6CEK3_Lates_calcarifer                | --NMGSDSASVNSMRST---YSVLSP-----IRPQDVRNR     | FLBGSVLGSG | 284 |
| A0A3B4VK37_Seriola_dumerili                | --NMGSDSASVNSMRST---YSVLSP-----IRPQDVRNR     | FLBGSVLGSG | 284 |
| A0A3Q3GNS7_Labrus_bergylta                 | --NMGSDSASVNSMRST---YSVLSP-----IRPQDVRNR     | FLBGSVLGSG | 283 |
| A0A3Q3RRU7_9TELE_Mastacembelus_armatus     | --NMGSDSASVNSLRST---YSVLSP-----IRPQDVRNR     | FLBGSVLGSG | 278 |
| A0A4U5UTG8_Collichthys_lucidus             | --NMGSDSASVNSMRST---YSVLSP-----IRPQDVRNR     | FLBGSVLGSG | 287 |
| A0A3B4ZI99_Stegastes_partitus              | --NMGSDSASVNSMRST---YSVLSP-----IRPQDVRNR     | FLBGSVLGSG | 287 |
| A0A3Q1H1R6_Acanthochromis_polyacanthus     | --NMGSDSASVNSMRST---YSVLSP-----IRPQDVRNR     | FLBGSVLGSG | 292 |
| A0A3Q1CXU7_Amphiprion_ocellaris            | --NMGSDSASVNSMRST---YSVLSP-----IRPQDVRNR     | FLBGSVLGSG | 285 |
| A0A3P8SMU2_Amphiprion_percula              | --NMGSDSASVNSMRST---YSVLSP-----IRPQDVRNR     | FLBGSVLGSG | 288 |
| A0A5J5DH05_Etheostoma_spectabile           | --NMGSDSASVNSMRST---YSVLSP-----IRPQDVRNR     | FLBGSVLGSG | 285 |
| A0A484DDW2_Perca_flavescens                | --NMGSDSASVNSMRST---YSVLSP-----IRPQDVRNR     | FLBGSVLGSG | 285 |
| A0A4Z2H351_Liparis_tanakae                 | --TMGSDSASVNSMRST---YSVLSP-----IRPQDVRNR     | FLBGSVLGSG | 283 |
| W5UJU6_Ictalurus_punctatus                 | --TMVSDRTSVNSMKSA---FSLVNP-----IRPKDVRNR     | FLBGSVLGSG | 285 |
| A0A5N5KDW8_Pangasianodon_hypophthalmus     | --TMVSDSTSVNSMKST---FSLVNP-----IRPKDVRNR     | FLBGSVLGSG | 253 |
| A0A3P8ZCA3_Esox_lucius                     | --SMVSDNTSVNSMKST---FSLVNP-----IRPRDVRNR     | FLBGSVLGSG | 290 |

A0A4W5L9K3\_Hucho\_hucho --NMVLNNTSVNSMKST---FVSLNP-----ITPRDVRNRSFLGSGVIGSGALLG 291  
 A0A1S3NKU9\_Salmo\_salar --NMVLNNTSVNSMKST---FVSLNP-----IRPRDVRNRSFLGSGVIGSGALLG 296  
 W5L4Z3\_Astyanax\_mexicanus --TMVADSASVNSMKSN---FSALNP-----IRPKDVRNRSFLGSGVIGNGALLG 284  
 A0A3B4C5F1\_Pygocentrus\_nattereri --TMVSDASVNSMKST---FSALNP-----IRPKDVRNRSFLGSGVIGNGALLG 286  
 H3BEM7\_Latimeria\_chalumnae --SMVPDNSSVSSMKSS---STMRFPP-----ILCKDIRKRNFLGSLSTGALLG 333  
 A0A1L8F610\_Xenopus\_laevis SSSMVCNQCSSDSMKST---YSLTLP-----IRPKDMNRSFLGSLASGALLG 270  
 K7FPA9\_Pelodiscus\_sinensis --GMVYDSCSTDSMKST---FSLTLP-----LRAKDVRNRSFLGSLASGALLG 298  
 A0A452GIT0\_Gopherus\_agassizii --GMVCDSCSTDSMKST---FSLTLP-----LRAKDVRNRSFLGSLASGALLG 299  
 G3VXX0\_Sarcophilus\_harrisii --SVVCDNCSSTSVKSS---FSLTLP-----IHSKDIRSRAFMGSLTSGALLG 299  
 A0A4X2KFU4\_Vombatus\_ursinus --CMVCDNCSSTSLKSS---FSLTLP-----IHSKNVRSRSMGSLASGALLG 299  
 G1N6K2\_Meleagris\_gallopavo --GTVYDNCSTDSMKST---FSLTLP-----IRSKDVRNRSFLGSLASGALLG 233  
 F1P5J6\_Gallus\_gallus --G1VYDNCSTDSMKST---FSLTLP-----IRSKDVRNRSFLGSLASGALLG 301  
 U3IH52\_Anas\_platyrhynchos\_platyrhynchos --GMVYDNCSTDSMKST---FSLTLP-----IRSKDVRNRSFLGSLANGALLG 281  
 A0A15IMFV8\_Alligator\_mississippiensis --GMVCDSCSTDSMKSS---FSLTLP-----IRAKDVRNRSFLGSLASGALLG 92  
 A0A1U7RBH0\_Alligator\_sinensis --GMVCDSCSTDSMKSS---FSLTLP-----IRAKDVRNRSFLGSLASGALLG 260  
 U3JGA7\_Ficedula\_albicollis --GTIFYDNCSTDSMKST---FSLTLP-----IRAKDVRNRSFLGSLASGALLG 296  
 A0A3L8SD89\_Chloebia\_gouldiae --GTLYDNCSTDSMKST---FSLTLP-----IRAKDVRNRSFLGSLASGALLG 278  
 H0Z776-Taeniopygia\_guttata --GTLYDNCSTDSMKST---FSLTLP-----IRAKDVRNRSFLGSLASGALLG 236  
 A0A218V5X6\_Lonchura\_striata\_domestica --GTLYDNCSTDSMKST---FSLTLP-----IRAKDVRNRSFLGSLASGALLG 296  
 A0A0Q3MLL4\_Amazona\_aestiva --GMVYDNCSTDSMKST---FSLTLP-----IRSKDVRNRSFLGSLASGALLG 301  
 A0A1V4J6C2\_Patagioenas\_fasciata\_monilis --GMVYDNCSTDSMKST---FSLTLP-----IRSKDVRNRSFLGSLASGALLG 298  
 A0A210M3Z8\_Columba\_livia --GMVYDNCSTDSMKST---FSLTLP-----IRSKDVRNRSFLGSLASGALLG 298  
 INP5E\_Drosophila\_melanogaster -----GSNLRARQLMAAHALN-----IPADNARERSYLDGR-LGSTSLG 378

::\* : :\*:

INP5E\_Homo\_sapiens ADELARYEPORNALFVATWNMGGOKELPPS----LDEFLPAEADYQDIYVIGVQEGC 342  
 INP5E\_Pan\_troglodytes ADELARYEPORNALFVATWNMGGOKELPPS----LDEFLPAEADYQDIYVIGVQEGC 342  
 A0A2K5K2A0\_Colobus\_angolensis\_palliatu ADELARYEPORNALFVATWNMGGOKELPPS----LDEFLPAEADYQDIYVIGVQEGC 271  
 A0A2K6PY13\_Rhinopithecus\_roxellana ADELARYEPORNALFVATWNMGGOKELPPS----LDEFLPAEADYQDIYVIGVQEGC 343  
 H2PTZ0\_Pongo\_abelii ADELARYEPORNALFVATWNMGGOKELPPS----LDEFLPAEADYQDIYVIGVQEGC 339  
 A0A2K6U2B2\_Saimiri\_boliviensis\_bolivi ADELARYEPORNALFVATWNMGGOKELPPS----LDEFLPAEADYQDIYVIGVQEGC 327  
 A0A2K6F2I5\_Propithecus\_coquereli ADELARYEPORNALFVATWNMGGOKELPPS----LDEFLPAEADYQDIYVIGVQEGC 340  
 A0A2K6KW3\_Rhinopithecus\_bieti ADELARYEPORNALFVATWNMGGOKELPPS----LDEFLPAEADYQDIYVIGVQEGC 235  
 A0A2K5MDJ3\_Cercocebus\_atys ADELARYEPORNALFVATWNMGGOKELPPS----LDEFLPAEADYQDIYVIGVQEGC 341  
 A0A2K5XR75\_Mandrillus\_leucophaeus ADELARYEPORNALFVATWNMGGOKELPPS----LDEFLPAEADYQDIYVIGVQEGC 75  
 A0A0D9RTF7\_Chlorocebus\_sabaeus ADELARYEPORNALFVATWNMGGOKELPPS----LDEFLPAEADYQDIYVIGVQEGC 342  
 A0A096NRS4\_Papio\_anubis ADELARYEPORNALFVATWNMGGOKELPPS----LDEFLPAEADYQDIYVIGVQEGC 341  
 A0A2K5U0T2\_Macaca\_fascicularis ADELARYEPORNALFVATWNMGGOKELPPS----LDEFLPAEADYQDIYVIGVQEGC 342  
 F7DRP8\_Macaca\_mulatta ADELARYEPORNALFVATWNMGGOKELPPS----LDEFLPAEADYQDIYVIGVQEGC 342  
 A0A2K5PH54\_Cebus\_capucinus\_imitator ADELARYEPORNALFVATWNMGGOKELPPS----LDEFLPAEADYQDIYVIGVQEGC 336  
 A0A2K5CN95\_Aotus\_nancymae ADELARYEPORNALFAATWNMGGOKELPPS----LDEFLPAEADYQDIYVIGVQEGC 344  
 A0A3Q0DNV4\_Tarsius\_syrichta ADELARYEPORNALFVATWNMGGOKELPPS----LDEFLPAEADYQDIYVIGVQEGC 71  
 HOXE73\_Otlemur\_garnettii ADELARYEPORNALFVATWNMGGOKELPPS----LDEFLPAEADYQDIYVIGVQEGC 345  
 I3N2L4\_Ictidomys\_tridecemlineatus ADELARYEPORNALFVATWNMGGOKELPPS----LDEFLPTEADYQDIYVIGVQEGC 271  
 F7BT66\_Callithrix\_jacchus ADELARYEPORNALFVATWNMGGOKELPPS----LDEFLPAEADYQDIYVIGVQEGC 344  
 A0A250Y3V1\_Castor\_canadensis ADELARYEPORNALFVATWNMGGOKELPPS----LDEFLPTEADYQDIYVIGVQEGC 336  
 A0A1S3G993Dipodomys\_ordii ADELARYEPORNALFVATWNMGGOKELPPS----LDEFLPTEADYQDIYVIGVQEGC 288  
 HOVEZ3\_Cavia\_porcellus ADELARYEPORNALFVATWNMGGOKELPPS----LDEFLPTEADYQDIYVIGVQEGC 344  
 G5B6B1\_Heterocephalus\_glaber ADELARYEPORNALFVATWNMGGOKELPPS----LDEFLPTEADYQDIYVIGVQEGC 348  
 A0A2Y9E841\_Trichechus\_manatus\_latirostr ADELARYEPORNALFVATWNMGGOKELPPN----LDEFLPTEADYQDIYVIGVQEGC 323  
 L5KA82\_Pteropus\_alecto ADELARYEPORNALFVATWNMGGOKELPPN----LDEFLPTEADYQDIYVIGVQEGC 318  
 A0A5N4EAQ5\_Camelus\_dromedarius ADELARYEPORNALFVATWNMGGOKELPPN----LDEFLPTEADYQDIYVIGVQEGC 354  
 A0A3Q2HCU7\_Equus\_caballus ADELARYEPORNALFVATWNMGGOKELPPN----LDEFLPTEADYQDIYVIGVQEGC 351  
 A0A1S2ZM74\_Erinaceus\_europaeus ADELARYEPORNALFVATWNMGGOKELPPN----LDEFLPTEADYQDIYVIGVQEGC 345  
 A0A3Q0DCZ7\_Mesocricetus\_auratus ADELARYEPORNALFVATWNMGGOKELPPS----LDEFLPTEADYQDIYVIGVQEGC 337  
 G3I6Z4\_Cricetulus\_griseus ADELARYEPORNALFVATWNMGGOKELPPS----LDEFLPTEADYQDIYVIGVQEGC 337  
 INP5E\_Rattus\_norvegicus ADELARYEPORNALFVATWNMGGOKELPPS----LDEFLPTEADYQDIYVIGVQEGC 346  
 INP5E\_Mus\_musculus ADELARYEPORNALFVATWNMGGOKELPPS----LDEFLPTEADYQDIYVIGVQEGC 345  
 A0A2Y9NRK2\_Delphinapterus\_leucas ADELARYEPORNALFVATWNMGGOKELPPN----LDEFLPTEADYQDIYVIGVQEGC 325  
 A0A2Y9SXS0\_Physeter\_macrocephalus ADELARYEPORNALFVATWNMGGOKELPPN----LDEFLPTEADYQDIYVIGVQEGC 310  
 E1BAU6\_Bos\_taurus ADELARYEPORNALFVATWNMGGOKELPPN----LDEFLPTEADYQDIYVIGVQEGC 354  
 A0A4W2BWU9\_Bos\_indicus\_x\_Bos\_taurus ADELARYEPORNALFVATWNMGGOKELPPN----LDEFLPTEADYQDIYVIGVQEGC 354  
 L8IYW6\_Bos\_mutus ADELARYEPORNALFVATWNMGGOKELPPN----LDEFLPTEADYQDIYVIGVQEGC 354  
 A0A452DQV4\_Capra\_hircus ADELARYEPORNALFVATWNMGGOKELPPN----LDEFLPTEADYQDIYVIGVQEGC 354  
 A0A5J5MJZ6\_Muntiacus\_reevesi ADELARYEPORNALFVATWNMGGOKELPPN----LDEFLPTEADYQDIYVIGVQEGC 354  
 A0A5N3WU40\_Muntiacus\_muntjak ADELARYEPORNALFVATWNMGGOKELPPN----LDEFLPTEADYQDIYVIGVQEGC 354  
 A0A3Q7V225\_Ursus\_arctos\_horribilis ADELARYEPORNALFVATWNMGGOKELPPN----LDEFLPTEADYQDIYVIGVQEGC 340  
 A0A452Q8J6\_Ursus\_americanus ADELARYEPORNALFVATWNMGGOKELPPN----LDEFLPTEADYQDIYVIGVQEGC 340  
 A0A452VEA9\_Ursus\_maritimus ADELARYEPORNALFVATWNMGGOKELPPN----LDEFLPTEADYQDIYVIGVQEGC 344  
 A0A2U3ZR12\_Odobenus\_rossmaris\_divergens ADELARYEPORNALFVATWNMGGOKELPPN----LDEFLPTEADYQDIYVIGVQEGC 310  
 A0A3Q7N7C7\_Callorhinus\_ursinus ADELARYEPORNALFVATWNMGGOKELPPN----LDEFLPTEADYQDIYVIGVQEGC 310  
 A0A2Y9HBQ8\_Neomonachus\_schauinslandi ADELARYEPORNALFVATWNMGGOKELPPN----LDEFLPTEADYQDIYVIGVQEGC 311  
 A0A485NC41\_Lynx\_pardinus ADELARYEPORNALFVATWNMGGOKELPPN----LDEFLPTEADYQDIYVIGVQEGC 334  
 A0A3Q7QUW1\_Vulpes\_vulpes ADELARYEPORNALFVATWNMGGOKELPPN----LDEFLPTEADYQDIYVIGVQEGC 311  
 F1PDA7\_Canis\_lupus\_familiaris ADELARYEPORNALFVATWNMGGOKELPPN----LDEFLPTEADYQDIYVIGVQEGC 320  
 A0A2Y9JFT0\_Enhydra\_lutris\_kenyoni ADELARYEPORNALFVATWNMGGOKELPPN----LDEFLPTEADYQDIYVIGVQEGC 340  
 M3YJ90\_Mustela\_putorius\_furo ADELARYEPORNALFVATWNMGGOKELPPN----LDEFLPTEADYQDIYVIGVQEGC 340  
 I3JX61\_Oreochromis\_niloticus ADELARYEPORNALFYIATWNMGGOKELPPN----LDDLLPTDSEFAQDIYVIGVQEGC 339  
 A0A3Q4H5I7\_Neolamplogus\_brichardi ADELARYEPORNALFYIATWNMGGOKELPPN----LDDLLPTDSEFAQDIYVIGVQEGC 339

A0A3B4FRA1\_Pundamilia nyererei  
A0A3P8QQM7\_Astatotilapia calliptera  
W5M6X5\_Lepisosteus oculatus  
A0A3B3RRU9\_Paramormyrops kingsleyae  
A0A4W4HDW3\_Electrophorus electricus  
A0A3Q3IZN0\_Monopterus albus  
A0A3P8VEE4\_Cynoglossus semilaevis  
A0A3Q1H6D9\_Anabas testudineus  
A0A4W6CEK3\_Lates calcarifer  
A0A3B4VK37\_Seriola dumerili  
A0A3Q3GNS7\_Labrus bergylta  
A0A3Q3RRU7\_9TELE Mastacembelus armatus  
A0A4U5UTG8\_Collichthys lucidus  
A0A3B4ZI99\_Stegastes partitus  
A0A3Q1H1R6\_Acanthochromis polyacanthus  
A0A3Q1CXU7\_Amphiprion ocellaris  
A0A3P8SMU2\_Amphiprion percula  
A0A5J5DH05\_Etheostoma spectabile  
A0A484DW2\_Perca flavescens  
A0A4Z2H351\_Liparis tanakae  
W5UJU6\_Ictalurus punctatus  
A0A5N5KW8\_Pangasianodon hypophthalmus  
A0A3P8ZCA3\_Esox lucius  
A0A4W5L9K3\_Hucho hucho  
A0A1S3NKU9\_Salmo salar  
W5L4Z3\_Astyanax mexicanus  
A0A3B4C5P1\_Pygocentrus nattereri  
H3BEM7\_Latimeria chalumnae  
A0A1L8F610\_Xenopus laevis  
K7FPA9\_Pelodiscus sinensis  
A0A452GIT0\_Gopherus agassizii  
G3VXX0\_Sarcophilus harrisii  
A0A4X2KFU4\_Vombatus ursinus  
G1N6K2\_Meleagris gallopavo  
F1P5J6\_Gallus gallus  
U3IH52\_Anas platyrhynchos platyrhynchos  
A0A151MFV8\_Alligator mississippiensis  
A0A1U7RBH0\_Alligator sinensis  
U3JGA7\_Ficedula albicollis  
A0A3L8SD89\_Chloebia gouldiae  
H0Z776\_Taeniopygia guttata  
A0A218V5X6\_Lonchura striata domestica  
A0A0Q3MLL4\_Amazona aestiva  
A0A1V4J6C2\_Patagioenas fasciata monilis  
A0A2I0M3Z8\_Columba livia  
INP5E\_Drosophila melanogaster

ABEELDRLEPERRVGYIATWNMOGKGLPVN---LDDLLPTDSEFAQDYVIVGVEGC 339  
ABEELDRLEPERRVGYIATWNMOGKGLPVN---LDDLLPTDSEFAQDYVIVGVEGC 339  
ABEELDRLEPERRVGYIATWNMOGKGLPVN---LDDLLPADSEFAQDYVIVGVEGC 290  
ABEELDRLEPERRVGYIATWNMOGKGLPAD---LDDLLPTDSEFAQDYVIVGVEGC 340  
ABEELDRLEPERRVGYIATWNMOGKGLPSS---LDDLLPTDMEFAQDYVIVGVEGC 337  
ABEELDRLEPERRVGYVVTWNMOGNGMPAN---LDDLLPMDSEFAQDYVIVGVEGC 337  
ABEELDRLEPERRVGYIATWNMOGKGLPVN---LDDLLPTDSDTFAQDYVIVGVEGC 330  
ABEELDRLEPERRVGYIATWNMOGKGLPAN---LDDLLPTDSEFAQDYVIVGVEGC 340  
ABEELDRLEPERRVGYIATWNMOGKGLPAN---LDDLLPTDSEFAQDYVIVGVEGC 340  
ABEELDRLEPERRVGYIATWNMOGERGLPTN---LDDLLPTDSEFAQDYVIVGVEGC 340  
ABEELDRLEPERRVGYIATWNMOGKGLPSN---LDDLLPTDSEFAQDYVIVGVEGC 339  
ABEELDRLEPERRVGYIATWNMOGKGLPPN---LDDLLPTDSEFAQDYVIVGVEGC 334  
ABEELDRLEPERRVGYIATWNMOGKGLPGN---LDDLLPTDSEFAQDYVIVGVEGC 343  
ABEELDRLEPERRVGYIATWNMOGKGLPTN---LDDLLPTDSEFAQDYVIVGVEGC 343  
ABEELDRLEPERRVGYIATWNMOGKGLPTN---LDDLLPTDSEFAQDYVIVGVEGC 348  
ABEELDRLEPERRVGYIATWNMOGKGLPTN---LDDLLPTDSEFAQDYVIVGVEGC 341  
ABEELDRLEPERRVGYIATWNMOGKGLPTN---LDDLLPTDSEFAQDYVIVGVEGC 344  
ABEELDRLEPERRVGYIATWNMOGKGLPAN---LDDLLPTDSEFAQDYVIVGVEGC 341  
ABEELDRLEPERRVGYIATWNMOGKGLPAN---LDDLLPTDSEFAQDYVIVGVEGC 341  
ABEELDRLEPERRVGYIATWNMOGKGLPSN---LDDLLPTDSEFAQDYVIVGVEGC 339  
ABEELDRLEPERRVGYIATWNMOGKGLPNN---LDDLLPTDSEFAQDYVIVGVEGC 341  
ABEELDRLEPERRVGYIATWNMOGKGLPNN---LDDLLPTDSEFAQDYVIVGVEGC 346  
ABEELDRLEPERRVGYIATWNMOGKGLPNN---LDDLLPTDSEFAQDYVIVGVEGC 347  
ABEELDRLEPERRVGYIATWNMOGKGLPNN---LDDLLPTDSEFAQDYVIVGVEGC 352  
PEELDRLEPERRVGYIATWNMOGKGLPNN---LDDLLPTDSEFAQDYVIVGVEGC 340  
PEELDRLEPERRVGYIATWNMOGKGLPNN---LDDLLPTDSEFAQDYVIVGVEGC 342  
SEELDRLEPERRVGYVVTWNMOGKGLPEN---LDDLLPSDSEFAQDYVIVGVEGC 389  
ABEELDRLEPERRVGYIATWNMOGKGLPES---LDDLLPSDDDFADYVIVGVEGC 326  
SBEELDRLEPERRVGYIATWNMOGKGLPEN---LDDLLPSDDDFADYVIVGVEGC 354  
ABEELDRLEPERRVGYIATWNMOGKGLPEN---LDDLLPSDDDFADYVIVGVEGC 355  
ABEELDRLEPERRVGYIATWNMOGKGLPNN---LDDLLPSDDDFADYVIVGVEGC 355  
ABEELDRLEPERRVGYIATWNMOGKGLPNN---LDDLLPSDDDFADYVIVGVEGC 355  
ABEELDRLEPERRVGYIATWNMOGKGLPEN---LDDLLPSDDDFADYVIVGVEGC 289  
ABEELDRLEPERRVGYIATWNMOGKGLPEN---LDDLLPSDDDFADYVIVGVEGC 357  
ABEELDRLEPERRVGYIATWNMOGKGLPVN---LDDLLPSDDDFADYVIVGVEGC 337  
ABEELDRLEPERRVGYIATWNMOGKGLPEN---LDDLLPSDDDFADYVIVGVEGC 148  
ABEELDRLEPERRVGYIATWNMOGKGLPEN---LDDLLPSDDDFADYVIVGVEGC 316  
ABEELDRLEPERRVGYIATWNMOGKGLPVN---LDDLLPSDDDFADYVIVGVEGC 352  
ABEELDRLEPERRVGYIATWNMOGKGLPVN---LDDLLPSDDDFADYVIVGVEGC 334  
ABEELDRLEPERRVGYIATWNMOGKGLPVN---LDDLLPSDDDFADYVIVGVEGC 292  
ABEELDRLEPERRVGYIATWNMOGKGLPVN---LDDLLPSDDDFADYVIVGVEGC 352  
ABEELDRLEPERRVGYIATWNMOGKGLPLN---LDDLLPSDDDFADYVIVGVEGC 357  
ABEELDRLEPERRVGYIATWNMOGKGLPVN---LDDLLPSDDDFADYVIVGVEGC 354  
ABEELDRLEPERRVGYIATWNMOGKGLPVN---LDDLLPSDDDFADYVIVGVEGC 354  
PEELDRLEPERRVGYIATWNMOGKGLPSN---LDDLLPSDDDFADYVIVGVEGC 433  
\*\* : : \* . : : \* : : \* : : \* : : \*

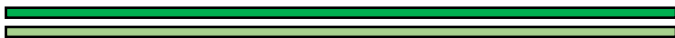

INP5E\_Homo sapiens  
INP5E\_Pan troglodytes  
A0A2K5K2A0\_Colobus angolensis palliatus  
A0A2K6P1Y13\_Rhinopithecus roxellana  
H2PTZ0\_Pongo abelii  
A0A2K6U2B2\_Saimiri boliviensis boliviensis  
A0A2K6F2I5\_Propithecus coquereli  
A0A2K6KCW3\_Rhinopithecus bieti  
A0A2K5MDJ3\_Cercocebus atys  
A0A2K5XR75\_Mandrillus leucophaeus  
A0A0D9RTF7\_Chlorocebus sabaeus  
A0A096NRS4\_Papio anubis  
A0A2K5U0T2\_Macaca fascicularis  
F7DRP8\_Macaca mulatta  
A0A2K5PHS4\_Cebus capucinus imitator  
A0A2K5CN95\_Aotus nancymae  
A0A3Q0DNV4\_Tarsius syrichta  
HOXE73\_Otolemur garnettii  
I3N2L4\_Ictidomys tridecemlineatus  
F7BT66\_Callithrix jacchus  
A0A250Y3V1\_Castor canadensis  
A0A1S3G993Dipodomys ordii  
HOVEZ3\_Cavia porcellus  
G5B6B1\_Heterocephalus glaber  
A0A2Y9E841\_Trichochus manatus latirostris  
L5KA82\_Pteropus alecto  
A0A5N4EAQ5\_Camelus dromedarius  
A0A3Q2HCU7\_Equus caballus  
A0A1S2ZM74\_Erinaceus europaeus  
A0A3Q0DCZ7\_Mesocricetus auratus  
G3I6Z4\_Cricetulus griseus

SDREWETRIQELGPHVVLSSAAHGWLKMSLFIRRDLEWFCSEVEECSTVTTTRIVSQI 401  
SDREWETRIQELGPHVVLSSAAHGWLKMSLFIRRDLEWFCSEVEECSTVTTTRIVSQI 401  
SDREWETRIQELGPHVVLSSAAHGWLKMSLFIRRDLEWFCSEVEECSTVTTTRIVSQI 330  
SDREWETRIQELGPHVVLSSAAHGWLKMSLFIRRDLEWFCSEVEECSTVTTTRIVSQI 402  
SDREWETRIQELGPHVVLSSAAHGWLKMSLFIRRDLEWFCSEVEECSTVTTTRIVSQI 398  
SDREWETRIQELGPHVVLSSAAHGWLKMSLFIRRDLEWFCSEVEECSTVTTTRIVSQI 386  
SDREWETRIQELGPHVVLSSAAHGWLKMSLFIRRDLEWFCSEVEECSTVTTTRIVSQI 399  
SDREWETRIQELGPHVVLSSAAHGWLKMSLFIRRDLEWFCSEVEECSTVTTTRIVSQI 294  
SDREWETRIQELGPHVVLSSAAHGWLKMSLFIRRDLEWFCSEVEECSTVTTTRIVSQI 400  
SDREWETRIQELGPHVVLSSAAHGWLKMSLFIRRDLEWFCSEVEECSTVTTTRIVSQI 134  
SDREWETRIQELGPHVVLSSAAHGWLKMSLFIRRDLEWFCSEVEECSTVTTTRIVSQI 401  
SDREWETRIQELGPHVVLSSAAHGWLKMSLFIRRDLEWFCSEVEECSTVTTTRIVSQI 401  
SDREWETRIQELGPHVVLSSAAHGWLKMSLFIRRDLEWFCSEVEECSTVTTTRIVSQI 401  
SDREWETRIQELGPHVVLSSAAHGWLKMSLFIRRDLEWFCSEVEECSTVTTTRIVSQI 395  
SDREWETRIQELGPHVVLSSAAHGWLKMSLFIRRDLEWFCSEVEECSTVTTTRIVSQI 403  
SDREWETRIQELGPHVVLSSAAHGWLKMSLFIRRDLEWFCSEVEECSTVTTTRIVSQI 130  
SDREWETRIQELGPHVVLSSAAHGWLKMSLFIRRDLEWFCSEVEECSTVTTTRIVSQI 405  
SDREWETRIQELGPHVVLSSAAHGWLKMSLFIRRDLEWFCSEVEECSTVTTTRIVSQI 330  
SDREWETRIQELGPHVVLSSAAHGWLKMSLFIRRDLEWFCSEVEECSTVTTTRIVSQI 403  
SDREWETRIQELGPHVVLSSAAHGWLKMSLFIRRDLEWFCSEVEECSTVTTTRIVSQI 395  
SDREWETRIQELGPHVVLSSAAHGWLKMSLFIRRDLEWFCSEVEECSTVTTTRIVSQI 347  
SDREWETRIQELGPHVVLSSAAHGWLKMSLFIRRDLEWFCSEVEECSTVTTTRIVSQI 403  
SDREWETRIQELGPHVVLSSAAHGWLKMSLFIRRDLEWFCSEVEECSTVTTTRIVSQI 407  
SDREWETRIQELGPHVVLSSAAHGWLKMSLFIRRDLEWFCSEVEECSTVTTTRIVSQI 382  
SDREWETRIQELGPHVVLSSAAHGWLKMSLFIRRDLEWFCSEVEECSTVTTTRIVSQI 377  
SDREWETRIQELGPHVVLSSAAHGWLKMSLFIRRDLEWFCSEVEECSTVTTTRIVSQI 413  
SDREWETRIQELGPHVVLSSAAHGWLKMSLFIRRDLEWFCSEVEECSTVTTTRIVSQI 410  
SDREWETRIQELGPHVVLSSAAHGWLKMSLFIRRDLEWFCSEVEECSTVTTTRIVSQI 404  
SDREWETRIQELGPHVVLSSAAHGWLKMSLFIRRDLEWFCSEVEECSTVTTTRIVSQI 396  
SDREWETRIQELGPHVVLSSAAHGWLKMSLFIRRDLEWFCSEVEECSTVTTTRIVSQI 396

|                                         |           |                  |      |       |      |         |         |     |
|-----------------------------------------|-----------|------------------|------|-------|------|---------|---------|-----|
| INP5E_Rattus_norvegicus                 | SDREWEVTR | QELGPGQVVLSSAAHG | LYMS | FIRRD | WFCS | EVEYSTV | TRIVSQI | 405 |
| INP5E_Mus_musculus                      | SDREWEVTR | QELGPGQVVLSSAAHG | LYMS | FIRRD | WFCS | EVEYSTV | TRIVSQI | 404 |
| A0A2Y9NRK2_Delphinapterus_leucas        | SDREWEVTR | QELGPHVVMYSAAHG  | LYMS | LIRRD | WFCS | EVEYSTV | TRIVSQI | 384 |
| A0A2Y9SXS0_Physeter_macrocephalus       | SDREWEVTR | QELGPHVVMYSAAHG  | LYMS | LIRRD | WFCS | EVEYSTV | TRIVSQI | 369 |
| E1BAU6_Bos_taurus                       | SDREWEVTR | QELGPHVVMYSAAHG  | LYMS | LIRRD | WFCS | EVEYSTV | TRIVSQI | 413 |
| A0A4W2BWU9_Bos_indicus_x_Bos_taurus     | SDREWEVTR | QELGPHVVMYSAAHG  | LYMS | LIRRD | WFCS | EVEYSTV | TRIVSQI | 413 |
| L8IYW6_Bos_mutus                        | SDREWEVTR | QELGPHVVMYSAAHG  | LYMS | LIRRD | WFCS | EVEYSTV | TRIVSQI | 413 |
| A0A452DQV4_Capra_hircus                 | SDREWEVTR | QELGPHVVMYSAAHG  | LYMS | LIRRD | WFCS | EVEYSTV | TRIVSQI | 413 |
| A0A5J5MJZ6_Muntiacus_reevesi            | SDREWEVTR | QELGPHVVMYSAAHG  | LYMS | LIRRD | WFCS | EVEYSTV | TRIVSQI | 413 |
| A0A5N3WU40_Muntiacus_muntjak            | SDREWEVTR | QELGPHVVMYSAAHG  | LYMS | LIRRD | WFCS | EVEYSTV | TRIVSQI | 413 |
| A0A3Q7V225_Ursus_arctos_horribilis      | SDREWEVTR | QELGPHVVMYSAAHG  | LYMS | LIRRD | WFCS | EVEYSTV | TRIVSQI | 399 |
| A0A452Q8J6_Ursus_americanus             | SDREWEVTR | QELGPHVVMYSAAHG  | LYMS | LIRRD | WFCS | EVEYSTV | TRIVSQI | 399 |
| A0A452VEA9_Ursus_maritimus              | SDREWEVTR | QELGPHVVMYSAAHG  | LYMS | LIRRD | WFCS | EVEYSTV | TRIVSQI | 403 |
| A0A2U3ZR12_Odobenus_rosmarus_divergens  | SDREWEVTR | QELGPHVVMYSAAHG  | LYMS | LIRRD | WFCS | EVEYSTV | TRIVSQI | 369 |
| A0A3Q7N7C7_Callorhinus_ursinus          | SDREWEVTR | QELGPHVVMYSAAHG  | LYMS | LIRRD | WFCS | EVEYSTV | TRIVSQI | 369 |
| A0A2Y9HBQ8_Neomonachus_schauinslandi    | SDREWEVTR | QELGPHVVMYSAAHG  | LYMS | LIRRD | WFCS | EVEYSTV | TRIVSQI | 370 |
| A0A485NC41_Lynx_pardinus                | SDREWEVTR | QELGPHVVMYSAAHG  | LYMS | LIRRD | WFCS | EVEYSTV | TRIVSQI | 393 |
| A0A3Q7QUW1_Vulpes_vulpes                | SDREWEVTR | QELGPHVVMYSAAHG  | LYMS | LIRRD | WFCS | EVEYSTV | TRIVSQI | 370 |
| F1PDA7_Canis_lupus_familiaris           | SDREWEVTR | QELGPHVVMYSAAHG  | LYMS | LIRRD | WFCS | EVEYSTV | TRIVSQI | 379 |
| A0A2Y9JFT0_Enhydra_lutris_kenyoni       | SDREWEVTR | QELGPHVVMYSAAHG  | LYMS | LIRRD | WFCS | EVEYSTV | TRIVSQI | 399 |
| M3YJ90_Mustela_putorius_furo            | SDREWEVTR | QELGPHVVMYSAAHG  | LYMS | LIRRD | WFCS | EVEYSTV | TRIVSQI | 399 |
| I3JX61_Oreochromis_niloticus            | SDREWEVTR | QELGPHVVMYSAAHG  | LYMS | LIRRD | WFCS | EVEYSTV | TRIVSQI | 398 |
| A0A3Q4H517_Neolamprologus_brichardi     | SDREWEVTR | QELGPHVVMYSAAHG  | LYMS | LIRRD | WFCS | EVEYSTV | TRIVSQI | 398 |
| A0A3B4FRA1_Pundamilia_nyererei          | SDREWEVTR | QELGPHVVMYSAAHG  | LYMS | LIRRD | WFCS | EVEYSTV | TRIVSQI | 398 |
| A0A3P8QQM7_Astatotilapia_calliptera     | SDREWEVTR | QELGPHVVMYSAAHG  | LYMS | LIRRD | WFCS | EVEYSTV | TRIVSQI | 398 |
| W5M6X5_Lepisosteus_oculatus             | SDREWEVTR | QELGPHVVMYSAAHG  | LYMS | LIRRD | WFCS | EVEYSTV | TRIVSQI | 349 |
| A0A3B3RRU9_Paramormyrops_kingsleyae     | SDREWEVTR | QELGPHVVMYSAAHG  | LYMS | LIRRD | WFCS | EVEYSTV | TRIVSQI | 399 |
| A0A4W4HDW3_Electrophorus_electricus     | SDREWEVTR | QELGPHVVMYSAAHG  | LYMS | LIRRD | WFCS | EVEYSTV | TRIVSQI | 396 |
| A0A3Q3IZN0_Monopterus_albus             | SDREWEVTR | QELGPHVVMYSAAHG  | LYMS | LIRRD | WFCS | EVEYSTV | TRIVSQI | 396 |
| A0A3P8VEE4_Cynoglossus_semilaevis       | SDREWEVTR | QELGPHVVMYSAAHG  | LYMS | LIRRD | WFCS | EVEYSTV | TRIVSQI | 389 |
| A0A3Q1H6D9_Anabas_testudineus           | SDREWEVTR | QELGPHVVMYSAAHG  | LYMS | LIRRD | WFCS | EVEYSTV | TRIVSQI | 399 |
| A0A4W6CEK3_Lates_calcarifer             | SDREWEVTR | QELGPHVVMYSAAHG  | LYMS | LIRRD | WFCS | EVEYSTV | TRIVSQI | 399 |
| A0A3B4VK37_Seriola_dumerili             | SDREWEVTR | QELGPHVVMYSAAHG  | LYMS | LIRRD | WFCS | EVEYSTV | TRIVSQI | 399 |
| A0A3Q3GNS7_Labrus_bergylla              | SDREWEVTR | QELGPHVVMYSAAHG  | LYMS | LIRRD | WFCS | EVEYSTV | TRIVSQI | 398 |
| A0A3Q3RRU7_9TELE_Mastacembelus_armatus  | SDREWEVTR | QELGPHVVMYSAAHG  | LYMS | LIRRD | WFCS | EVEYSTV | TRIVSQI | 393 |
| A0A4U5UTG8_Collichthys_lucidus          | SDREWEVTR | QELGPHVVMYSAAHG  | LYMS | LIRRD | WFCS | EVEYSTV | TRIVSQI | 402 |
| A0A3B4Z199_Stegastes_partitus           | SDREWEVTR | QELGPHVVMYSAAHG  | LYMS | LIRRD | WFCS | EVEYSTV | TRIVSQI | 402 |
| A0A3Q1HR16_Acanthochromis_polyacanthus  | SDREWEVTR | QELGPHVVMYSAAHG  | LYMS | LIRRD | WFCS | EVEYSTV | TRIVSQI | 407 |
| A0A3Q1CXU7_Amphiprion_ocellaris         | SDREWEVTR | QELGPHVVMYSAAHG  | LYMS | LIRRD | WFCS | EVEYSTV | TRIVSQI | 400 |
| A0A3P8SMU2_Amphiprion_percula           | SDREWEVTR | QELGPHVVMYSAAHG  | LYMS | LIRRD | WFCS | EVEYSTV | TRIVSQI | 403 |
| A0A5J5DH05_Etheostoma_spectabile        | SDREWEVTR | QELGPHVVMYSAAHG  | LYMS | LIRRD | WFCS | EVEYSTV | TRIVSQI | 400 |
| A0A484DDW2_Perca_flavescens             | SDREWEVTR | QELGPHVVMYSAAHG  | LYMS | LIRRD | WFCS | EVEYSTV | TRIVSQI | 400 |
| A0A4Z2H351_Liparis_tanakae              | SDREWEVTR | QELGPHVVMYSAAHG  | LYMS | LIRRD | WFCS | EVEYSTV | TRIVSQI | 398 |
| W5UJU6_Ictalurus_punctatus              | SDREWEVTR | QELGPHVVMYSAAHG  | LYMS | LIRRD | WFCS | EVEYSTV | TRIVSQI | 400 |
| A0A5N5KDW8_Pangasianodon_hypophthalmus  | SDREWEVTR | QELGPHVVMYSAAHG  | LYMS | LIRRD | WFCS | EVEYSTV | TRIVSQI | 368 |
| A0A3P8ZCA3_Esox_lucius                  | SDREWEVTR | QELGPHVVMYSAAHG  | LYMS | LIRRD | WFCS | EVEYSTV | TRIVSQI | 405 |
| A0A4W5L9K3_Hucho_hucho                  | SDREWEVTR | QELGPHVVMYSAAHG  | LYMS | LIRRD | WFCS | EVEYSTV | TRIVSQI | 406 |
| A0A1S3NKU9_Salmo_salar                  | SDREWEVTR | QELGPHVVMYSAAHG  | LYMS | LIRRD | WFCS | EVEYSTV | TRIVSQI | 411 |
| W5L4Z3_Astyanax_mexicanus               | SDREWEVTR | QELGPHVVMYSAAHG  | LYMS | LIRRD | WFCS | EVEYSTV | TRIVSQI | 399 |
| A0A3B4C5P1_Pygocentrus_nattereri        | SDREWEVTR | QELGPHVVMYSAAHG  | LYMS | LIRRD | WFCS | EVEYSTV | TRIVSQI | 401 |
| H3BEM7_Latimeria_chalumnae              | SDREWEVTR | QELGPHVVMYSAAHG  | LYMS | LIRRD | WFCS | EVEYSTV | TRIVSQI | 448 |
| A0A1L8F610_Xenopus_laevis               | SDREWEVTR | QELGPHVVMYSAAHG  | LYMS | LIRRD | WFCS | EVEYSTV | TRIVSQI | 385 |
| K7FPA9_Pelodiscus_sinensis              | SDREWEVTR | QELGPHVVMYSAAHG  | LYMS | LIRRD | WFCS | EVEYSTV | TRIVSQI | 413 |
| A0A452GIT0_Gopherus_agassizii           | SDREWEVTR | QELGPHVVMYSAAHG  | LYMS | LIRRD | WFCS | EVEYSTV | TRIVSQI | 414 |
| G3VXX0_Sarcophilus_harrisii             | SDREWEVTR | QELGPHVVMYSAAHG  | LYMS | LIRRD | WFCS | EVEYSTV | TRIVSQI | 414 |
| A0A4X2KFU4_Vombatus_ursinus             | SDREWEVTR | QELGPHVVMYSAAHG  | LYMS | LIRRD | WFCS | EVEYSTV | TRIVSQI | 414 |
| G1N6K2_Meleagris_gallopavo              | SDREWEVTR | QELGPHVVMYSAAHG  | LYMS | LIRRD | WFCS | EVEYSTV | TRIVSQI | 348 |
| F1P5J6_Gallus_gallus                    | SDREWEVTR | QELGPHVVMYSAAHG  | LYMS | LIRRD | WFCS | EVEYSTV | TRIVSQI | 416 |
| U3IH52_Anas_platyrhynchos_platyrhynchos | SDREWEVTR | QELGPHVVMYSAAHG  | LYMS | LIRRD | WFCS | EVEYSTV | TRIVSQI | 396 |
| A0A151MFV8_Alligator_mississippiensis   | SDREWEVTR | QELGPHVVMYSAAHG  | LYMS | LIRRD | WFCS | EVEYSTV | TRIVSQI | 207 |
| A0A1U7RBH0_Alligator_sinensis           | SDREWEVTR | QELGPHVVMYSAAHG  | LYMS | LIRRD | WFCS | EVEYSTV | TRIVSQI | 375 |
| U3JGA7_Ficedula_albicollis              | SDREWEVTR | QELGPHVVMYSAAHG  | LYMS | LIRRD | WFCS | EVEYSTV | TRIVSQI | 411 |
| A0A3L8SD89_Chloebia_gouldiae            | SDREWEVTR | QELGPHVVMYSAAHG  | LYMS | LIRRD | WFCS | EVEYSTV | TRIVSQI | 393 |
| H0Z776_Taeniopygia_guttata              | SDREWEVTR | QELGPHVVMYSAAHG  | LYMS | LIRRD | WFCS | EVEYSTV | TRIVSQI | 351 |
| A0A218V5X6_Lonchura_striata_domestica   | SDREWEVTR | QELGPHVVMYSAAHG  | LYMS | LIRRD | WFCS | EVEYSTV | TRIVSQI | 411 |
| A0A0Q3MLL4_Amazonia_aestiva             | SDREWEVTR | QELGPHVVMYSAAHG  | LYMS | LIRRD | WFCS | EVEYSTV | TRIVSQI | 416 |
| A0A1V4J6C2_Patagioenas_fasciata_monilis | SDREWEVTR | QELGPHVVMYSAAHG  | LYMS | LIRRD | WFCS | EVEYSTV | TRIVSQI | 413 |
| A0A210M3Z8_Columba_livia                | SDREWEVTR | QELGPHVVMYSAAHG  | LYMS | LIRRD | WFCS | EVEYSTV | TRIVSQI | 413 |
| INP5E_Drosophila_melanogaster           | SDREWEVTR | QELGPHVVMYSAAHG  | LYMS | LIRRD | WFCS | EVEYSTV | TRIVSQI | 492 |

\*: \*\* .\*\*:\* \*\* : : . \*.: : : :\*:\*:\* \* : : \*

|                                            |           |        |        |     |            |             |        |    |     |
|--------------------------------------------|-----------|--------|--------|-----|------------|-------------|--------|----|-----|
| INP5E_Homo_sapiens                         | RTKCALGIS | TEFGTS | FLFTSH | TSG | GKVAERLLDY | TRVQALALPRN | PDNPNY | SS | 461 |
| INP5E_Pan_troglodytes                      | RTKCALGIS | TEFGTS | FLFTSH | TSG | GKVAERLLDY | TRVQALALPRN | PDNPNY | SS | 461 |
| A0A2K5K2A0_Colobus_angolensis_palliatus    | RTKCALGIS | TEFGTS | FLFTSH | TSG | GKVAERLLDY | TRVQALALPRN | PDNPNY | SS | 390 |
| A0A2K6PY13_Rhinopithecus_roxellana         | RTKCALGIS | TEFGTS | FLFTSH | TSG | GKVAERLLDY | TRVQALALPRN | PDNPNY | SS | 462 |
| H2PTZ0_Pongo_abelii                        | RTKCALGIS | TEFGTS | FLFTSH | TSG | GKVAERLLDY | TRVQALALPRN | PDNPNY | SS | 458 |
| A0A2K6U2B2_Saimiri_boliviensis_boliviensis | RTKCALGIS | TEFGTS | FLFTSH | TSG | GKVAERLLDY | TRVQALALPRN | PDNPNY | SS | 446 |
| A0A2K6F2I5_Propithecus_coquereli           | RTKCALGIS | TEFGTS | FLFTSH | TSG | GKVAERLLDY | TRVQALALPRN | PDNPNY | SS | 459 |
| A0A2K6KCW3_Rhinopithecus_bieti             | RTKCALGIS | TEFGTS | FLFTSH | TSG | GKVAERLLDY | TRVQALALPRN | PDNPNY | SS | 354 |

A0A2K5MDJ3\_Cercopithecus atys KTKGALCISLTFEGTSLFVTSHTSGGKVAERLLDYRTVQALALPRNPDNTPYSS 460  
A0A2K5XR75\_Mandrillus leucophaeus KTKGALCVSLTFEGTSLFVTSHTSGGKVAERLLDYRTVQALALPRNPDNTPYSS 194  
A0A0D9RTF7\_Chlorocebus sabaeus KTKGALCVSLTFEGTSLFVTSHTSGGKVAERLLDYRTVQALALPRNPDNTPYSS 461  
A0A096NRS4\_Papio anubis KTKGALCVSLTFEGTSLFVTSHTSGGKVAERLLDYRTVQALALPRNPDNTPYSS 460  
A0A2K5U0T2\_Macaca fascicularis KTKGALCVSLTFEGTSLFVTSHTSGGKVAERLLDYRTVQALALPRNPDNTPYSS 461  
F7DRP8\_Macaca mulatta KTKGALCVSLTFEGTSLFVTSHTSGGKVAERLLDYRTVQALALPRNPDNTPYSS 461  
A0A2K5PHS4\_Cebus capucinus imitator KTKGALCVSLTFEGTSLFVTSHTSGGKVAERLLDYRTVQALALPRNPDNTPYSS 455  
A0A2K5CN95\_Aotus nancymae KTKGALCVSLTFEGTSLFVTSHTSGGKVAERLLDYRTVQALALPRNPDNTPYSS 463  
A0A3Q0DNV4\_Tarsius syrichta KTKGALCVSLTFEGTSLFVTSHTSGGKVAERLLDYRTVQALALPRNPDNTPYSS 190  
HOXE73\_Otolemur garnettii KTKGALCVSLTFEGTSLFVTSHTSGGKVAERLLDYRTVQALALPRNPDNTPYSS 465  
I3N2L4\_Ictidomys tridecemlineatus KTKGALCVSLTFEGTSLFVTSHTSGGKVAERLLDYRTVQALALPRNPDNTPYSS 390  
F7BT66\_Callithrix jacchus KTKGALCVSLTFEGTSLFVTSHTSGGKVAERLLDYRTVQALALPRNPDNTPYSS 463  
A0A250Y3V1\_Castor canadensis KTKGALCVSLTFEGTSLFVTSHTSGGKVAERLLDYRTVQALALPRNPDNTPYSS 455  
A0A1S3G993Dipodomys ordii KTKGALCVSLTFEGTSLFVTSHTSGGKVAERLLDYRTVQALALPRNPDNTPYSS 407  
HOVEZ3\_Cavia porcellus KTKGALCVSLTFEGTSLFVTSHTSGGKVAERLLDYRTVQALALPRNPDNTPYSS 463  
G5B6B1\_Heterocephalus glaber KTKGALCVSLTFEGTSLFVTSHTSGGKVAERLLDYRTVQALALPRNPDNTPYSS 467  
A0A2Y9E841\_Trichechus manatus latirostris KTKGALCVSLTFEGTSLFVTSHTSGGKVAERLLDYRTVQALALPRNPDNTPYSS 442  
L5KA82\_Pteropus alecto KTKGALCVSLTFEGTSLFVTSHTSGGKVAERLLDYRTVQALALPRNPDNTPYSS 437  
A0A5N4EAQ5\_Camelus dromedarius KTKGALCVSLTFEGTSLFVTSHTSGGKVAERLLDYRTVQALALPRNPDNTPYSS 473  
A0A3Q2HCU7\_Equus caballus KTKGALCVSLTFEGTSLFVTSHTSGGKVAERLLDYRTVQALALPRNPDNTPYSS 470  
A0A1S2ZM74\_Erinaceus europaeus KTKGALCVSLTFEGTSLFVTSHTSGGKVAERLLDYRTVQALALPRNPDNTPYSS 464  
A0A3Q0DCZ7\_Mesocricetus auratus KTKGALCVSLTFEGTSLFVTSHTSGGKVAERLLDYRTVQALALPRNPDNTPYSS 456  
G3I6Z4\_Cricetulus griseus KTKGALCVSLTFEGTSLFVTSHTSGGKVAERLLDYRTVQALALPRNPDNTPYSS 456  
INP5E\_Rattus norvegicus KTKGALCVSLTFEGTSLFVTSHTSGGKVAERLLDYRTVQALALPRNPDNTPYSS 465  
INP5E\_Mus musculus KTKGALCVSLTFEGTSLFVTSHTSGGKVAERLLDYRTVQALALPRNPDNTPYSS 464  
A0A2Y9NRK2\_Delphinapterus leucas KTKGALCVSLTFEGTSLFVTSHTSGGKVAERLLDYRTVQALALPRNPDNTPYSS 444  
A0A2Y9SXS0\_Physeter macrocephalus KTKGALCVSLTFEGTSLFVTSHTSGGKVAERLLDYRTVQALALPRNPDNTPYSS 429  
E1BAU6\_Bos taurus KTKGALCVSLTFEGTSLFVTSHTSGGKVAERLLDYRTVQALALPRNPDNTPYSS 473  
A0A4W2BWU9\_Bos indicus x Bos taurus KTKGALCVSLTFEGTSLFVTSHTSGGKVAERLLDYRTVQALALPRNPDNTPYSS 473  
L8IYW6\_Bos mutus KTKGALCVSLTFEGTSLFVTSHTSGGKVAERLLDYRTVQALALPRNPDNTPYSS 473  
A0A452DQV4\_Capra hircus KTKGALCVSLTFEGTSLFVTSHTSGGKVAERLLDYRTVQALALPRNPDNTPYSS 473  
A0A5J5MJZ6\_Muntiacus reevesi KTKGALCVSLTFEGTSLFVTSHTSGGKVAERLLDYRTVQALALPRNPDNTPYSS 473  
A0A5N3WU40\_Muntiacus muntjak KTKGALCVSLTFEGTSLFVTSHTSGGKVAERLLDYRTVQALALPRNPDNTPYSS 473  
A0A3Q7V225\_Ursus arctos horribilis KTKGALCVSLTFEGTSLFVTSHTSGGKVAERLLDYRTVQALALPRNPDNTPYSS 459  
A0A452Q8J6\_Ursus americanus KTKGALCVSLTFEGTSLFVTSHTSGGKVAERLLDYRTVQALALPRNPDNTPYSS 459  
A0A452VEA9\_Ursus maritimus KTKGALCVSLTFEGTSLFVTSHTSGGKVAERLLDYRTVQALALPRNPDNTPYSS 463  
A0A2U3ZR12\_Odobenus rosmarus divergens KTKGALCVSLTFEGTSLFVTSHTSGGKVAERLLDYRTVQALALPRNPDNTPYSS 429  
A0A3Q7N7C7\_Callorhinus ursinus KTKGALCVSLTFEGTSLFVTSHTSGGKVAERLLDYRTVQALALPRNPDNTPYSS 429  
A0A2Y9HBQ8\_Neomonachus schauinslandi KTKGALCVSLTFEGTSLFVTSHTSGGKVAERLLDYRTVQALALPRNPDNTPYSS 430  
A0A485NC41\_Lynx pardinus KTKGALCVSLTFEGTSLFVTSHTSGGKVAERLLDYRTVQALALPRNPDNTPYSS 453  
A0A3Q7QUW1\_Vulpes vulpes KTKGALCVSLTFEGTSLFVTSHTSGGKVAERLLDYRTVQALALPRNPDNTPYSS 430  
F1PDA7\_Canis lupus familiaris KTKGALCVSLTFEGTSLFVTSHTSGGKVAERLLDYRTVQALALPRNPDNTPYSS 439  
A0A2Y9JFT0\_Enhydra lutris kenyoni KTKGALCVSLTFEGTSLFVTSHTSGGKVAERLLDYRTVQALALPRNPDNTPYSS 459  
M3YJ90\_Mustela putorius furo KTKGALCVSLTFEGTSLFVTSHTSGGKVAERLLDYRTVQALALPRNPDNTPYSS 459  
I3XJ61\_Oreochromis niloticus KTKGAVGIALTFEGTSLFVTSHTSGAKVYERLLDYRTVQALALPRNPDNTPYSS 458  
A0A3Q4H5I7\_Neolamprologus brichardi KTKGAVGIALTFEGTSLFVTSHTSGAKVYERLLDYRTVQALALPRNPDNTPYSS 458  
A0A3B4FRA1\_Pundamilia nyererei KTKGAVGIALTFEGTSLFVTSHTSGAKVYERLLDYRTVQALALPRNPDNTPYSS 458  
A0A3P8QQM7\_Astatotilapia calliptera KTKGAVGIALTFEGTSLFVTSHTSGAKVYERLLDYRTVQALALPRNPDNTPYSS 458  
W5M6X5\_Lepisosteus oculatus KTKGALCVSLTFEGTSLFVTSHTSGGKVAERLLDYRTVQALALPRNPDNTPYSS 409  
A0A3B3RRU9\_Paramormyrops kingsleyae KTKGAVGIALTFEGTSLFVTSHTSGAKVYERLLDYRTVQALALPRNPDNTPYSS 459  
A0A4W4HDW3\_Electrophorus electricus KTKGAVGIALTFEGTSLFVTSHTSGAKVYERLLDYRTVQALALPRNPDNTPYSS 456  
A0A3Q3IZN0\_Monopterus albus KTKGAVGIALTFEGTSLFVTSHTSGAKVYERLLDYRTVQALALPRNPDNTPYSS 456  
A0A3P8VEE4\_Cynoglossus semilaevis KTKGAVGIALTFEGTSLFVTSHTSGAKVYERLLDYRTVQALALPRNPDNTPYSS 449  
A0A3Q1H6D9\_Anabas testudineus KTKGAVGIALTFEGTSLFVTSHTSGAKVYERLLDYRTVQALALPRNPDNTPYSS 459  
A0A4W6CEK3\_Lates calcarifer KTKGAVGIALTFEGTSLFVTSHTSGAKVYERLLDYRTVQALALPRNPDNTPYSS 459  
A0A3B4VK37\_Seriola dumerili KTKGAVGIALTFEGTSLFVTSHTSGAKVYERLLDYRTVQALALPRNPDNTPYSS 459  
A0A3Q3GNS7\_Labrus bergylta KTKGAVGIALTFEGTSLFVTSHTSGAKVYERLLDYRTVQALALPRNPDNTPYSS 458  
A0A3Q3RRU7\_9TELE\_Mastacembelus armatus KTKGAVGIALTFEGTSLFVTSHTSGAKVYERLLDYRTVQALALPRNPDNTPYSS 453  
A0A4U5UTG8\_Collichthys lucidus KTKGAVGIALTFEGTSLFVTSHTSGAKVYERLLDYRTVQALALPRNPDNTPYSS 462  
A0A3B4ZI99\_Stegastes partitus KTKGAVGIALTFEGTSLFVTSHTSGAKVYERLLDYRTVQALALPRNPDNTPYSS 462  
A0A3Q1H1R6\_Acanthochromis polyacanthus KTKGAVGIALTFEGTSLFVTSHTSGAKVYERLLDYRTVQALALPRNPDNTPYSS 467  
A0A3Q1CXU7\_Amphiprion ocellaris KTKGAVGIALTFEGTSLFVTSHTSGAKVYERLLDYRTVQALALPRNPDNTPYSS 460  
A0A3P8SMU2\_Amphiprion percula KTKGAVGIALTFEGTSLFVTSHTSGAKVYERLLDYRTVQALALPRNPDNTPYSS 463  
A0A5J5DH05\_Etheostoma spectabile KTKGAVGIALTFEGTSLFVTSHTSGAKVYERLLDYRTVQALALPRNPDNTPYSS 460  
A0A484DDW2\_Perca flavescens KTKGAVGIALTFEGTSLFVTSHTSGAKVYERLLDYRTVQALALPRNPDNTPYSS 458  
A0A4Z2H351\_Liparis tanakae KTKGAVGIALTFEGTSLFVTSHTSGAKVYERLLDYRTVQALALPRNPDNTPYSS 458  
W5UJ6\_Ictalurus punctatus KTKGAVGIALTFEGTSLFVTSHTSGAKVYERLLDYRTVQALALPRNPDNTPYSS 460  
A0A5N5KDW8\_Pangasianodon hypophthalmus KTKGAVGIALTFEGTSLFVTSHTSGAKVYERLLDYRTVQALALPRNPDNTPYSS 428  
A0A3P8ZCA3\_Esox lucius KTKGAVGIALTFEGTSLFVTSHTSGAKVYERLLDYRTVQALALPRNPDNTPYSS 465  
A0A4W5L9K3\_Hucho hucho KTKGAVGIALTFEGTSLFVTSHTSGAKVYERLLDYRTVQALALPRNPDNTPYSS 466  
A0A1S3NKU9\_Salmo salar KTKGAVGIALTFEGTSLFVTSHTSGAKVYERLLDYRTVQALALPRNPDNTPYSS 471  
W5L4Z3\_Astyanax mexicanus KTKGAVGIALTFEGTSLFVTSHTSGAKVYERLLDYRTVQALALPRNPDNTPYSS 459  
A0A3B4C5P1\_Pygocentrus nattereri KTKGAVGIALTFEGTSLFVTSHTSGAKVYERLLDYRTVQALALPRNPDNTPYSS 461  
H3BEM7\_Latimeria chalumnae KTKGAVGIALTFEGTSLFVTSHTSGAKVYERLLDYRTVQALALPRNPDNTPYSS 508  
A0A1L8F610\_Xenopus laevis KTKGALCVSLTFEGTSLFVTSHTSGGKVAERLLDYRTVQALALPRNPDNTPYSS 445  
K7FPA9\_Pelodiscus sinensis KTKGALCVSLTFEGTSLFVTSHTSGGKVAERLLDYRTVQALALPRNPDNTPYSS 473  
A0A452GIT0\_Gopherus agassizii KTKGALCVSLTFEGTSLFVTSHTSGGKVAERLLDYRTVQALALPRNPDNTPYSS 474  
G3VXX0\_Sarcophilus harrisii KTKGALCVSLTFEGTSLFVTSHTSGGKVAERLLDYRTVQALALPRNPDNTPYSS 474  
A0A4X2KFU4\_Vombatus ursinus KTKGALCVSLTFEGTSLFVTSHTSGGKVAERLLDYRTVQALALPRNPDNTPYSS 474  
G1N6K2\_Meleagris gallopavo KTKGALCVSLTFEGTSLFVTSHTSGGKVAERLLDYRTVQALALPRNPDNTPYSS 408  
F1P5J6\_Gallus gallus KTKGALCVSLTFEGTSLFVTSHTSGGKVAERLLDYRTVQALALPRNPDNTPYSS 476

U3IH52\_Anas\_platyrhynchos\_platyrhynchos  
 A0A151MFV8\_Alligator\_mississippiensis  
 A0A1U7RBH0\_Alligator\_sinensis  
 U3JGA7\_Ficedula\_albicollis  
 A0A318SD89\_Chloebia\_gouldiae  
 HOZ776\_Taeniopygia\_guttata  
 A0A218V5X6\_Lonchura\_striata\_domestica  
 A0A0Q3MLL4\_Amazona\_aestiva  
 A0A1V4J6C2\_Patagioenas\_fasciata\_monilis  
 A0A210M3Z8\_Columba\_livia  
 INP5E\_Drosophila\_melanogaster

RTKGCALICITTFEGTSLFLFTSHITSGKSKVNERKLDYNTIQAATLTKNPDNTNPKYSS 456  
 RTKGCALICISTTFEGTSLFLFTSHITSGKSKVYERILDYNTIQAALPKNPDNTNPKYSS 267  
 RTKGCALICISTTFEGTSLFLFTSHITSGKSKVYERILDYNTIQAALPKNPDNTNPKYSS 435  
 RTKGCALICISTTFEGTSLFLFTSHITSGKSKVNERKLDYNTIQAATLTKNPDNTNPKYSS 471  
 RTKGCALICISTTFEGTSLFLFTSHITSGKSKVNERKLDYNTIQAATLTKNPDNTNPKYSS 453  
 RTKGCALICISTTFEGTSLFLFTSHITSGKSKVNERKLDYNTIQAALPKNPDNTNPKYSS 411  
 RTKGCALICISTTFEGTSLFLFTSHITSGKSKVNERKLDYNTIQAALPKNPDNTNPKYSS 471  
 RTKGCALICISTTFEGTSLFLFTSHITSGKSKVNERKLDYNTIQAATLTKNPDNTNPKYSS 476  
 RTKGCALICISTTFEGTSLFLFTSHITSGKSKVNERKLDYNTIQAALPKNPDNTNPKYSS 473  
 RTKGCALICISTTFEGTSLFLFTSHITSGKSKVNERKLDYNTIQAALPKNPDNTNPKYSS 473  
 RTKGAVALICISTTFEGTSLFLFTSHITAHQCKVKERVSDVKIINADLERNIPNQ---RHK 549  
 :\*\*\*\*. : :\*\*\*\*\*:\*\*:\*\*. : : : \* : : : \*\* : : \*

INP5E\_Homo\_sapiens  
 INP5E\_Pan\_troglodytes  
 A0A2K5K2A0\_Colobus\_angolensis\_palliatus  
 A0A2K6PY13\_Rhinopithecus\_roxellana  
 H2PT20\_Pongo\_abelii  
 A0A2K6U2B2\_Saimiri\_boliviensis\_boliviensis  
 A0A2K6F2I5\_Propithecus\_coquereli  
 A0A2K6KW3\_Rhinopithecus\_bieti  
 A0A2K5MDJ3\_Cercocebus\_atys  
 A0A2K5XR75\_Mandrillus\_leucophaeus  
 A0A0D9RTF7\_Chlorocebus\_sabaeus  
 A0A096NRS4\_Papio\_anubis  
 A0A2K5U0T2\_Macaca\_fascicularis  
 F7DRP8\_Macaca\_mulatta  
 A0A2K5PHS4\_Cebus\_capucinus\_imitator  
 A0A2K5CN95\_Aotus\_nancymae  
 A0A3Q0DNV4\_Tarsius\_syrichta  
 HOXE73\_Otolemur\_garnettii  
 I3N2L4\_Ictidomys\_tridecemlineatus  
 F7BT66\_Callithrix\_jacchus  
 A0A250Y3V1\_Castor\_canadensis  
 A0A183G993Dipodomys\_ordii  
 HOVE23\_Cavia\_porcellus  
 G5B6B1\_Heterocephalus\_glaber  
 A0A2Y9E841\_Trichechus\_manatus\_latirostris  
 L5KA92\_Pteropus\_alecto  
 A0A5N4EAQ5\_Camelus\_dromedarius  
 A0A3Q2HCU7\_Equus\_caballus  
 A0A182ZM74\_Erinaceus\_europaeus  
 A0A3Q0DC27\_Mesocricetus\_auratus  
 G3I6Z4\_Cricetulus\_griseus  
 INP5E\_Rattus\_norvegicus  
 INP5E\_Mus\_musculus  
 A0A2Y9NRK2\_Delphinapterus\_leucas  
 A0A2Y9SXS0\_Physeter\_macrocephalus  
 E1BAU6\_Bos\_taurus  
 A0A4W2BWU9\_Bos\_indicus\_x\_Bos\_taurus  
 L8IYW6\_Bos\_mutus  
 A0A452DQV4\_Capra\_hircus  
 A0A5J5MJZ6\_Muntiacus\_reevesi  
 A0A5N3WU40\_Muntiacus\_muntjak  
 A0A3Q7V225\_Ursus\_arctos\_horribilis  
 A0A452Q8J6\_Ursus\_americanus  
 A0A452VEA9\_Ursus\_maritimus  
 A0A2U3ZR12\_Odobenus\_rosmarus\_divergens  
 A0A3Q7N7C7\_Callorhinus\_ursinus  
 A0A2Y9HBQ8\_Neomonachus\_schauinslandi  
 A0A485NC41\_Lynx\_pardinus  
 A0A3Q7QUW1\_Vulpes\_vulpes  
 F1PDA7\_Canis\_lupus\_familiaris  
 A0A2Y9JFT0\_Enhydra\_lutris\_kenyoni  
 M3YJ90\_Mustela\_putorius\_furo  
 I3JX61\_Oreochromis\_niloticus  
 A0A3Q4H517\_Neolamprologus\_birchardi  
 A0A3B4FRA1\_Pundamilia\_nyererei  
 A0A3P8QQM7\_Astatotilapia\_calliptera  
 W5M6X5\_Lepisosteus\_oculatus  
 A0A3B3RRU9\_Paramormyrops\_kingsleyae  
 A0A4W4HDW3\_Electrophorus\_electricus  
 A0A3Q3I2N0\_Monopterous\_albus  
 A0A3P8VEE4\_Cynoglossus\_semilaevis  
 A0A3Q1H6D9\_Anabas\_testudineus  
 A0A4W6CEK3\_Lates\_calcarifer  
 A0A3B4VK37\_Seriola\_dumerilii  
 A0A3Q3GNS7\_Labrus\_bergylta  
 A0A3Q3RRU7\_9TELE\_Mastacembelus\_armatus

AADVTRFDFEVEWBGDENFRISGGRTVVDALCQGLV----VDVPALQHQDQIREVRKG 517  
 AADVTRFDFEVEWBGDENFRISGGRTVVDALCQGLV----VDVPALQHQDQIREVRKG 517  
 AADVTRFDFEVEWBGDENFRISGGRTVVDALCQGLV----VDVPALQHQDQIQEVRKG 446  
 AADVTRFDFEVEWBGDENFRISGGRTVVDALCQGLV----VDVPALQHQDQIQEVRKG 518  
 AADVTRFDFEVEWBGDENFRISGGRTVVDALCQGLV----VDVPALQHQDQIQEVRKG 514  
 AADVTRFDFEVEWBGDENFRISGGRAADALQGGLA----VDVPALQHQDQIREVRKG 502  
 AADVTRFDFEVEWBGDENFRISGGRTVVDALCQGLV----VDVPALQHQDQIREVRKG 515  
 AADVTRFDFEVEWBGDENFRISGGRTVVDALCQGLV----VDVPALQHQDQIREVRKG 410  
 AADVTRFDFEVEWBGDENFRISGGRTVVDALCQGLV----VDVPALQHQDQIREVRKG 516  
 ADVVTRFDFEVEWBGDENFRISGGRTVVDALCQGLV----VDVPALQHQDQIREVRKG 250  
 AADVTRFDFEVEWBGDENFRISGGRTVVDALCQGLV----VDVPALQHQDQIREVRKG 517  
 AADVTRFDFEVEWBGDENFRISGGRTVVDALCQGLV----VDVPALQHQDQIREVRKG 516  
 AADVTRFDFEVEWBGDENFRISGGRTVVDALCQGLV----VDVPALQHQDQIREVRKG 517  
 AADVTRFDFEVEWBGDENFRISGGRTVVDALCQGLV----VDVPALQHQDQIREVRKG 517  
 AADVTRFDFEVEWBGDENFRISGGRAADALGRGLA----VDVPALQHQDQIREVRKG 511  
 AADVTRFDFEVEWBGDENFRISGGRAADALGKGLA----VDVPALQHQDQIREVRKG 519  
 PADVTRFDFEVEWBGDENFRISGGRAADALHQGLA----ADVPALEHQDQIQEVRKG 246  
 AADVTRFDFEVEWBGDENFRISGGRAADTLQGLAE----TDVPTLEHQDQIREVRKG 521  
 AADVTRFDFEVEWBGDENFRISGGRTVVDALCQGLD----VDVPALQHQDQIQEVRKG 446  
 AADVTRFDFEVEWBGDENFRISGGRTVVDALCQGLA----VDVPALQHQDQIQEVRKG 519  
 AADVTRFDFEVEWBGDENFRISGGRTVVDALCQGLA----VDVPALQHQDQIREVRKG 511  
 ADVVTRFDFEVEWBGDENFRISGGRTVVDALCQGLD----VDVPALQHQDQIREVRKG 463  
 TADVTRFDFEVEWBGDENFRISGGRAAEARQERE----VAVRLEQHQDQIREVRKG 519  
 AADVTRFDFEVEWBGDENFRISGGRAAEGARQERE----AAVRVLEQHQDQIREVRKG 523  
 PVDVTRFDFEVEWBGDENFRISAGRTVVDALCQGLA----TDMSALEHQDQIREVRKG 498  
 PADVTRFDFEVEWBGDENFRISGGRTVVDALCQGLA----VAVRLEQHQDQIREVRKG 493  
 AADVTRFDFEVEWBGDENFRISGGRAAEALCQDPE----ADVPALEHQDQIREVRKG 529  
 SADVTRFDFEVEWBGDENFRISGGRTVVDALCQDLG----VNVPALEHQDQIREVRKG 526  
 SADVTRFDFEVEWBGDENFRISGGRAAEALCQDVG----ARVPALQHQDQIREVRKG 520  
 AGDVTRFDFEVEWBGDENFRISGGRAAEALCQDPE----VDVLALQHQDQIQEVRKG 512  
 AGDVTRFDFEVEWBGDENFRISGGRTVVDALCQDPE----VDVLALQHQDQIREVRKG 512  
 AGDVTRFDFEVEWBGDENFRISGGRTVVDALCQDPE----VDVLALQHQDQIREVRKG 521  
 AGDVTRFDFEVEWBGDENFRISGGRTVVDALCQDPE----VDVLALQHQDQIREVRKG 520  
 AADVTRFDFEVEWBGDENFRISGGRAAEALCQDPE----ASVQALEHQDQIREVRKG 500  
 AADVTRFDFEVEWBGDENFRISGGRAAEALCQDPE----ASVQALEHQDQIREVRKG 485  
 AADVTRFDFEVEWBGDENFRISGGRAAEALCQDLS----SSVQALEHQDQIREVRKG 529  
 AADVTRFDFEVEWBGDENFRISGGRAAEALCQDLS----SSVQALEHQDQIREVRKG 529  
 AADVTRFDFEVEWBGDENFRISGGRAAEALCQDLG----SSVQALEHQDQIREVRKG 529  
 AADVTRFDFEVEWBGDENFRISGGRAAEALCQDLG----SSVQALEHQDQIREVRKG 529  
 AADVTRFDFEVEWBGDENFRISGGRAAEALCQDLG----SSVQALEHQDQIREVRKG 529  
 AADVTRFDFEVEWBGDENFRISGGRAAEALCQDLG----SSVQALEHQDQIREVRKG 529  
 AADVTRFDFEVEWBGDENFRISGGRAAEALCQDLG----SSVQALEHQDQIREVRKG 529  
 AADVTRFDFEVEWBGDENFRISGGRTVVDALCQDLG----EKVSALEHQDQIQEVRKG 515  
 AADVTRFDFEVEWBGDENFRISGGRTVVDALCQDLG----EKVSALEHQDQIQEVRKG 515  
 AADVTRFDFEVEWBGDENFRISGGRTVVDALCQDLG----EKVSALEHQDQIQEVRKG 517  
 AADVTRFDFEVEWBGDENFRISGGRTVVDALCQDLG----EKVSALEHQDQIQEVRKG 485  
 AADVTRFDFEVEWBGDENFRISGGRTVVDALCQDLG----EKVSALEHQDQIQEVRKG 485  
 AADVTRFDFEVEWBGDENFRISGGRTVVDALCQDLG----EKVSALEHQDQIQEVRKG 486  
 AADVTRFDFEVEWBGDENFRISGGRTVVDALCQDLG----EKVSALEHQDQIQEVRKG 509  
 AADVTRFDFEVEWBGDENFRISGGRTVVDALCQDLV----EKVSALEHQDQIQEVRKG 486  
 AADVTRFDFEVEWBGDENFRISGGRTVVDALCQDLV----EKVSALEHQDQIQEVRKG 495  
 AADVTRFDFEVEWBGDENFRISGGRTVVDALCQDLG----EKVSALEHQDQIQEVRKG 515  
 AADVTRFDFEVEWBGDENFRISGGRTVVDALCQDLG----EKVSALEHQDQIQEVRKG 515  
 AADVTRFDFEVEWBGDENFRISGGRTVVDALCQDLG----EKVSALEHQDQIQEVRKG 515  
 PSDVTRFDFEVEWBGDENFRISKDRSEVEALMSSTVG----GDMSPLEHQDQISKEVRKG 514  
 PSDVTRFDFEVEWBGDENFRISKDRSEVEALMSSTVG----GDMSPLEHQDQISKEVRKG 514  
 PSDVTRFDFEVEWBGDENFRISKDRSEVEALMSSTVG----GDMSPLEHQDQISKEVRKG 514  
 SSDVTRFDFEVEWBGDENFRISSEBRANVEALMSHTSG----GDMGLEHQDQISKEVRKG 465  
 SSDVTRFDFEVEWBGDENFRISSEBRANVEALMSHTSG----GDMGLEHQDQISKEVRKG 465  
 ASDVTRFDFEVEWBGDENFRISKDRHVDALNEHTG----TNMGSLQHQDQISKEVRKG 512  
 SSDVTRFDFEVEWBGDENFRISSEBRANVEALMSHTSG----GDMGLEHQDQISKEVRKG 512  
 PSDVTRFDFEVEWBGDENFRISKBRSDVDMKRTGEG----GDMSVLEHQDQISKEVRKG 505  
 SSDVTRFDFEVEWBGDENFRISKDRVEVENMNRVTG----DDMSPLEHQDQISKEVRKG 515  
 PSDVTRFDFEVEWBGDENFRISKDRVDESIMNRTVD----GDMGPLEHQDQISKEVRKG 515  
 PSDVTRFDFEVEWBGDENFRISKDRVDESLMNRVTG----ENMGPLEHQDQISKEVRKG 515  
 PSDVTRFDFEVEWBGDENFRISKDRVDESIMNRTVD----GDMGPLEHQDQISKEVRKG 514  
 PSDVTRFDFEVEWBGDENFRISKDRVDESIMNRTVD----GDMGPLEHQDQISKEVRKG 509





A0A452VEA9\_Ursus\_maritimus SIFKGFQEPDIHFLPSYKFDVWGKDSHAETTSKORTPSYTD RVMYFSRHKGD----- 567  
A0A2U3ZR12\_Odobenus\_rosmarus\_divergens SIFKGFQEPDIHFLPSYKFDIGKDSYDTSKORTPSYTD RVMYFSRHKGD----- 535  
A0A3Q7N7C7\_Callorhinus\_ursinus SIFKGFQEPDIHFLPSYKFDIGKDSYDTSKORTPSYTD RVMYFSRHKGD----- 535  
A0A2Y9HBQ8\_Neomonachus\_schauinslandi SVFRGFQEPDIHFLPSYKFDIGKDSYDTSKORTPSYTD RVMYFSRHKGD----- 536  
A0A485NC41\_Lynx\_pardinus SIFKGFQEPDIHFLPSYKFDIGKDSYDTSKORTPSYTD RVMYFSRHKGD----- 559  
A0A3Q7QUW1\_Vulpes\_vulpes SIFKGFQEPDIHFLPSYKFDIGKDSYDTSKORTPSYTD RVMYFSRHKGD----- 536  
F1PDA7\_Canis\_lupus\_familiaris SIFKGFQEPDIHFLPSYKFDIGKDSYDTSKORTPSYTD RVMYFSRHKGD----- 545  
A0A2Y9JFT0\_Enhydra\_lutris\_kenyoni SIFKGFQEPDIHFLPSYKFDIGKDSYDTSKORTPSYTD RVMYFSRHKGD----- 565  
M3YJ90\_Mustela\_putorius\_furo SIFKGFQEPDIHFLPSYKFDIGKDSYDTSKORTPSYTD RVMYFSRHKGD----- 565  
I3JX61\_Oreochromis\_niloticus SIFKGFQEASIHFLPTKFDIGCDVYDTSKORTPSYTD RLLFNRQAND----- 564  
A0A3Q4H5I7\_Neolamprologus\_brichardi SIFKGFQEASIHFLPTKFDIGRVDYDTSKORTPSYTD RLLFNRQAND----- 564  
A0A3B4FRA1\_Pundamilia\_nyererei SIFKGFQEASIHFLPTKFDIGRVDYDTSKORTPSYTD RLLFNRQAND----- 564  
A0A3P8QQM7\_Astatotilapia\_calliptera SIFKGFQEASIHFLPTKFDIGRVDYDTSKORTPSYTD RLLFNRQAND----- 564  
W5M6X5\_Lepisosteus\_oculatus SIFKGFQEAPIHFPLTKFDIGCDIYDTSKORTPSYTD RLLFNRQAD----- 515  
A0A3B3RRU9\_Paramormyrops\_kingsleyae SIFKGFQEAPISFLPTKFDVWGCDVYDTSKORTPSYTD RLLFNRQAD----- 564  
A0A4W4HDW3\_Electrophorus\_electricus SIFKGFQEAPIHFPLTKFDIGCDVYDTSKORTPSYTD RLLFNRQAD----- 562  
A0A3Q3IZN0\_Monopterus\_albus SVFRGFQEAPIHFPLTKFDINCDIYDTSKORTPSYTD RLLFNRQAD----- 562  
A0A3P8VEE4\_Cynoglossus\_semilaevis SIFKGFQEASIHFLPTKFDIGCDIYDTSKORTPSYTD RLLFNRQAD----- 555  
A0A3Q1H6D9\_Anabas\_testudineus SIFKGFQEAPIHFPLTKFDIGCDIYDTSKORTPSYTD RLLFNRQAD----- 565  
A0A4W6CEK3\_Lates\_calcarifer SIFKGFQEATIHFLPTKFDIGCDIYDTSKORTPSYTD RLLFNRQAD----- 565  
A0A3B4VK37\_Seriola\_dumerili SIFKGFQEATIHFLPTKFDIGCDIYDTSKORTPSYTD RLLFNRQAD----- 565  
A0A3Q3GNS7\_Labrus\_bergylta SIFKGFQEAPIHFPLTKFDVWGCDIYDTSKORTPSYTD RLLFNRQAD----- 564  
A0A3Q3RRU7\_9TELE\_Mastacembelus\_armatus SIFKGFQEAPIHFPLTKFDIGCDIYDTSKORTPSYTD RLLFNRQAD----- 559  
A0A4U5UTG8\_Collichthys\_lucidus SIFKGFQEAPIHFPLTKFDIGCDIYDTSKORTPSYTD RLLFNRQAND----- 568  
A0A3B4Z199\_Stegastes\_partitus SIFKGFQEAPIHFYPTKFDIGCDIYDTSKORTPSYTD RLLFNRQAD----- 568  
A0A3Q1HLR6\_Acanthochromis\_polyacanthus SIFKGFQEAPIHFYPTKFDIGCDIYDTSKORTPSYTD RLLFNRQAD----- 573  
A0A3Q1CXU7\_Amphiprion\_ocellaris SIFKGFQEAPIHFYPTKFDIGCDIYDTSKORTPSYTD RLLFNRQAD----- 566  
A0A3P8SMU2\_Amphiprion\_percula SIFKGFQEAPIHFYPTKFDIGCDIYDTSKORTPSYTD RLLFNRQAD----- 569  
A0A5J5DH05\_Etheostoma\_spectabile SIFKGFQEAPIHFPLTKFDIGCDIYDTSKORTPSYTD RLLFNRQAD----- 566  
A0A484DDW2\_Perca\_flavescens SIFKGFQEAPIHFPLTKFDVWGCDIYDTSKORTPSYTD RLLFNRQAD----- 566  
A0A4Z2H351\_Liparis\_tanakae SIFKGFQEAPIHFPLTKFDVWGCDIYDTSKORTPSYTD RLLFNRQAD----- 564  
W5UJU6\_Ictalurus\_punctatus SIFKGFQEAPIHFPLTKFDIGCDVYDTSKORTPSYTD RLLFNRQAD----- 566  
A0A5N5KDW8\_Pangasianodon\_hypophthalmus SIFKGFQEAPIHFPLTKFDIGCDVYDTSKORTPSYTD RLLFNRQAD----- 534  
A0A3P8ZCA3\_Esox\_lucius SIFKGFQEAPIHFPLTKFDVWGCDVYDTSKORTPSYTD RLLFNRQAD----- 571  
A0A4W5L9K3\_Hucho\_hucho SIFKGFQEALIQFLPTKFDVWGCDVYDTSKORTPSYTD RLLFNRQAD----- 572  
A0A1S3NKU9\_Salmo\_salar SIFKGFQEALIQFLPTKFDVWGCDVYDTSKORTPSYTD RLLFNRQAD----- 577  
W5L4Z3\_Astyanax\_mexicanus SIFKGFQEAPIHFPLTKFDIGCDVYDTSKORTPSYTD RLLFNRQAD----- 565  
A0A3B4C5P1\_Pygocentrus\_nattereri SIFKGFQEAPIHFPLTKFDIGCDIYDTSKORTPSYTD RLLFNRQAD----- 567  
H3BEM7\_Latimeria\_chalumnae SIFNGFREAVIGFLPTKFDVWGCDIYDSSAKORTPSYTD RLLFNRQAD----- 614  
A0A1L8F610\_Xenopus\_laevis TIFKGFQEAPIHFPLTKFDIGCDVYDSSSKORTPSYTD RVMYFSRHKGD----- 551  
K7PPA9\_Pelodiscus\_sinensis AIFKGFQEAIIHFPLTKFDIGQDSYDTSKORTPSYTD RVMYFSRHKGD----- 579  
A0A452GIT0\_Gopherus\_agassizii AIFKGFQEAIIHFPLTKFDIGQDSYDTSKORTPSYTD RVMYFSRHKGD----- 580  
G3VXX0\_Sarcophilus\_harrisii SIFKGFREADIHFFPSYKFDVWGKDSYDTSKORTPSYTD RVMYFSRHKGD----- 580  
A0A4X2KFU4\_Vombatus\_ursinus SIFKGFREADIHFFPSYKFDVWGKDSYDTSKORTPSYTD RVMYFSRHKGD----- 580  
G1N6K2\_Meleagris\_gallopavo SIFKGFQEADIHFFPSYKFDIGKDSYDTSKORTPSYTD RVMYFSRHKGD----- 514  
F1P5J6\_Gallus\_gallus SIFKGFQEADIHFFPSYKFDIGKDSYDTSKORTPSYTD RVMYFSRHKGD----- 582  
U3IH52\_Anas\_platyrhynchos\_platyrhynchos SIFKGFQEADIHFFPSYKFDIGKDSYDTSKORTPSYTD RVMYFSRHKGD----- 562  
A0A151MFV8\_Alligator\_mississippiensis SVFRGFQEAIIHFPLTKFDIGQDCYDTSKORTPSYTD RVMYFSRHKGD----- 373  
A0A1U7RBH0\_Alligator\_sinensis SVFRGFQEAIIHFPLTKFDIGQDCYDTSKORTPSYTD RVMYFSRHKGD----- 541  
U3JGA7\_Ficedula\_albicollis SIFKGFQEADIHFFPSYKFDIGKDSYDTSKORTPSYTD RVMYFSRHKGD----- 577  
A0A3L8SD89\_Chloebia\_gouldiae SIFKGFQEAIIHFPLTKFDIGKDSYDTSKORTPSYTD RVMYFSRHKGD----- 559  
H0Z776-Taeniopygia\_guttata SIFKGFQEAIIHFPLTKFDIGKDSYDTSKORTPSYTD RVMYFSRHKGD----- 517  
A0A218V5X6\_Lonchura\_striata\_domestica SIFKGFQEAIIHFPLTKFDIGKDSYDTSKORTPSYTD RVMYFSRHKGD----- 577  
A0A0Q3MLL4\_Amazona\_aestiva SIFKGFQEADIRFPLTKFDIGKDSYDTSKORTPSYTD RVMYFSRHKGD----- 582  
A0A1V4J6C2\_Patagioenas\_fasciata\_monilis SIFKGFQEADIHFFPSYKFDIGKDSYDTSKORTPSYTD RVMYFSRHKGD----- 579  
A0A210M3Z8\_Columba\_livia SIFKGFQEADIHFFPSYKFDIGKDSYDTSKORTPSYTD RVMYFSRHKGD----- 579  
INP5E\_Drosophila\_melanogaster AAFRFGMEANITFPPTKYKDPGSQNFDTSSKORAPAYTD RLLFNRQAD----- 669

: \* : : \* : \* : \* : \* : \* : \*

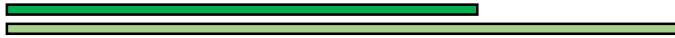

INP5E\_Homo\_sapiens -----CPVSYSCPGKTSDFHPVYGLFRVKVPPGRDNIPLAAGKFDREYLLGI 618  
INP5E\_Pan\_troglodytes -----CPVSYSCPGKTSDFHPVYGLFRVKVPPGRDNIPLAAGKFDREYLLGI 618  
A0A2K5K2A0\_Colobus\_angolensis\_palliatu -----CPVIYSCPGKTSDFHPVYGLFRVKVPPGRDNIPLAAGKFDREYLLGI 547  
A0A2K6PY13\_Rhinopithecus\_roxellana -----CPVIYSCPGKTSDFHPVYGLFRVKVPPGRDNIPLAAGKFDREYLLGI 619  
H2PT20\_Pongo\_abelii -----CPVSYSCPGKTSDFHPVYGLFRVKVPPGRDNIPLAAGKFDREYLLGI 615  
A0A2K6U2B2\_Saimiri\_boliviensis\_boliviensis -----CPVRYSCAGIRTSDFHPVYGLFRVKVPPGRDNIPLAAGKFDREYLLGI 603  
A0A2K6F215\_Propithecus\_coquereli -----CPVRYSCPGKTSDFHPVYGLFRVKVPPGRDNIPLAAGKFDREYLLGI 616  
A0A2K6KW3\_Rhinopithecus\_bieti -----CPVIYSCPGKTSDFHPVYGLFRVKVPPGRDNIPLAAGKFDREYLLGI 511  
A0A2K5MDJ3\_Cercocebus\_atys -----CPVSYSCPGKTSDFHPVYGLFRVKVPPGRDNIPLAAGKFDREYLLGI 617  
A0A2K5XR75\_Mandrillus\_leucophaeus -----CPVSYSCPGKTSDFHPVYGLFRVKVPPGRDNIPLAAGKFDREYLLGI 351  
A0A0D9RTF7\_Chlorocebus\_sabaeus -----CPVIYSCPGKTSDFHPVYGLFRVKVPPGRDNIPLAAGKFDREYLLGI 618  
A0A096NRS4\_Papio\_anubis -----CPVSYSCPGKTSDFHPVYGLFRVKVPPGRDNIPLAAGKFDREYLLGI 617  
A0A2K5U0T2\_Macaca\_fascicularis -----CPVSYSCPGKTSDFHPVYGLFRVKVPPGRDNIPLAAGKFDREYLLGI 618  
F7DRP8\_Macaca\_mulatta -----CPVSYSCPGKTSDFHPVYGLFRVKVPPGRDNIPLAAGKFDREYLLGI 618  
A0A2K5PH54\_Cebus\_capucinus\_imitator -----CPVRYSCAGIRTSDFHPVYGLFRVKVPPGRDNIPLAAGKFDREYLLGI 612  
A0A2K5CN95\_Aotus\_nancymae -----CPVRYSCAGIRTSDFHPVYGLFRVKVPPGRDNIPLAAGKFDREYLLGI 620  
A0A3Q0DNV4\_Tarsius\_syrichta -----CPVRYSCPGKTSDFHPVYGLFRVKVPPGRDNIPLAAGKFDREYLLGI 347  
HOXE73\_Otolemur\_garnettii -----CPVRYSCPGKTSDFHPVYGLFRVKVPPGRDNIPLAAGKFDREYLLGI 622  
I3N2L4\_Ictidomys\_tridecemlineatus -----CPVRYSCPGKTSDFHPVYGLFRVKVPPGRDNIPLAAGKFDREYLLGI 547  
F7BT66\_Callithrix\_jacchus -----CPVRYSCPGKTSDFHPVYGLFRVKVPPGRDNIPLAAGKFDREYLLGI 620

A0A250Y3V1\_Castor canadensis ----- SPLKYSSCPGKTSDDHFPVYGLFRVKVRFGRDNIPLAAGKFDREYVLLIGI 612  
A0A1S3G993Dipodomys ordii ----- CPLKYSSCLGKTSDDHFPVYGLFRVKVRFGRDNIPLAAGKFDREYVLLIGI 564  
HOVE23\_Cavia porcellus ----- HPVVIYSSCPGKTSDDHFPVYGLFRVVRVRFGRDNIPLAAGKFDREYVLLIGI 620  
G5B6L1\_Heterocephalus glaber ----- CPVVIYSSCPGKTSDDHFPVYGLFRVVRVRFGRDNIPLAAGKFDREYVLLIGI 624  
A0A2Y9E841\_Trichochus manatus latirostris ----- CPVVIYSSCPSKTSDDHFPVYGLFRVVRVRFGRDNIPLAAGKFDREYVLLIGI 599  
L5KA82\_Pteropus alecto ----- CPLKYSSCPGKTSDDHFPVYGLFRVKVRFGRDNIPLAAGKFDREYVLLIGI 594  
A0A5N4EAQ5\_Camelus dromedarius ----- RPIKIYSSCPGKTSDDHFPVYGLFRVVRVRFGRDNIPLAAGKFDREYVLLIGI 630  
A0A3Q2HCU7\_Equus caballus ----- CPVVIYSSCPGKTSDDHFPVYGLFRVKVRFGRDNIPLAAGKFDREYVLLIGI 627  
A0A1S2ZM74\_Erinaceus europaeus ----- CALKYASSCPGKTSDDHFPVYGLFRVKVRFGRDNIPLAAGKFDREYVLLIGI 621  
A0A3Q0DCZ7\_Mesocricetus auratus ----- CPMKYSSCPGKTSDDHFPVYGLFRVKVRFGRDNIPLAAGKFDREYVLLIGI 613  
G3I6Z4\_Cricetulus griseus ----- CPMKYSSCPGKTSDDHFPVYGLFRVKVRFGRDNIPLAAGKFDREYVLLIGI 613  
INP5E\_Rattus norvegicus ----- CPMKYSSCPGKTSDDHFPVYGLFRVKVRFGRDNIPLAAGKFDREYVLLIGI 622  
INP5E\_Mus musculus ----- CPMKYSSCPGKTSDDHFPVYGLFRVVKVRFGRDNIPLAAGKFDREYVLLIGI 621  
A0A2Y9NRK2\_Delphinapterus leucas ----- CPVVIYSSCPGKTSDDHFPVYGLFRVVRVRFGRDNIPLAAGKFDREYVLLIGI 601  
A0A2Y9SXS0\_Physeter macrocephalus ----- CPVVIYSSCPGKTSDDHFPVYGLFRVVRVRFGRDNIPLAAGKFDREYVLLIGI 586  
E1BAU6\_Bos taurus ----- CPVVIYSSCPGKTSDDHFPVYGLFRVKVRFGRDNIPLAAGKFDREYVLLIGI 630  
A0A4W2BWU9\_Bos indicus x Bos taurus ----- CPVVIYSSCPGKTSDDHFPVYGLFRVKVRFGRDNIPLAAGKFDREYVLLIGI 630  
L8IYW6\_Bos mutus ----- CPVVIYSSCPGKTSDDHFPVYGLFRVKVRFGRDNIPLAAGKFDREYVLLIGI 630  
A0A4S2DQV4\_Capra hircus ----- CPIKIYSSCPGKTSDDHFPVYGLFRVKVRFGRDNIPLAAGKFDREYVLLIGI 630  
A0A5U5MJZ6\_Muntiacus reevesi ----- CPVVIYSSCPGKTSDDHFPVYGLFRVKVRFGRDNIPLAAGKFDREYVLLIGI 630  
A0A5N3WU40\_Muntiacus muntjak ----- CPVVIYSSCPGKTSDDHFPVYGLFRVKVRFGRDNIPLAAGKFDREYVLLIGI 630  
A0A3Q7V225\_Ursus arctos horribilis ----- CPVVIYSSCPSKTSDDHFPVYGLFRVKVRFGRDNIPLAAGKFDREYVLLIGI 616  
A0A4S2Q8J6\_Ursus americanus ----- CPVVIYSSCPGKTSDDHFPVYGLFRVKVRFGRDNIPLAAGKFDREYVLLIGI 616  
A0A452VEA9\_Ursus maritimus ----- CPVVIYSSCPGKTSDDHFPVYGLFRVKVRFGRDNIPLAAGKFDREYVLLIGI 618  
A0A2U3ZR12\_Odobenus rosmarus divergens ----- CPIKIYSSCPGKTSDDHFPVYGLFRVKVRFGRDNIPLAAGKFDREYVLLIGI 586  
A0A3Q7N7C7\_Callorhinus ursinus ----- CPIKIYSSCPGKTSDDHFPVYGLFRVKVRFGRDNIPLAAGKFDREYVLLIGI 586  
A0A2Y9HBQ8\_Neomonachus schauinslandi ----- CPIKIYSSCPGKTSDDHFPVYGLFRVKVRFGRDNIPLAAGKFDREYVLLIGI 587  
A0A485NC41\_Lynx pardinus ----- CPVVIYSSCPGKTSDDHFPVYGLFRVKVRFGRDNIPLAAGKFDREYVLLIGI 610  
A0A3Q7QUW1\_Vulpes vulpes ----- CPVVIYSSCPGKTSDDHFPVYGLFRVKVRFGRDNIPLAAGKFDREYVLLIGI 587  
F1PDA7\_Canis lupus familiaris ----- CPVVIYSSCPGKTSDDHFPVYGLFRVKVRFGRDNIPLAAGKFDREYVLLIGI 596  
A0A2Y9JFT0\_Enhya lutris kenyoni ----- CPIKIYSSCPGKTSDDHFPVYGLFRVKVRFGRDNIPLAAGKFDREYVLLIGI 616  
M3YJ90\_Mustela putorius furo ----- CPIKIYSSCPGKTSDDHFPVYGLFRVKVRFGRDNIPLAAGKFDREYVLLIGI 616  
I3JX61\_Oreochromis niloticus ----- KTLMYTSCSNKTSDDHFPVYGVFQVKLRPGRDNIPLCAGQFDRSGLYLEGI 615  
A0A3Q4H5I7\_Neolamprologus brichardi ----- KTLMYTSCSNKTSDDHFPVYGVFQVKLRPGRDNIPLCAGQFDRSGLYLEGI 615  
A0A3B4FRA1\_Pundamilia nyererei ----- KTLMYTSCSNKTSDDHFPVYGVFQVKLRPGRDNIPLCAGQFDRSGLYLEGI 615  
A0A3P8QQM7\_Astatotilapia calliptera ----- KTLMYTSCSNKTSDDHFPVYGVFQVKLRPGRDNIPLCAGQFDRSGLYLEGI 615  
W5M6X5\_Lepisosteus oculatus ----- KVMKYACPTKTSDDHFPVYGVFQVKLRPGRDNIPLCAGQFDRSGLYLEGI 566  
A0A3B3RRU9\_Paramormyrops kingsleyae ----- TVVKYSSCSSKTSDDHFPVYGVFQVKLRPGRDNIPLCAGQFDRSGLYLEGI 615  
A0A4W4HDW3\_Electrophorus electricus ----- KVVRYTSCSSKTSDDHFPVYGVFQVKLRPGRDNIPLCAGQFDRSGLYLEGI 613  
A0A3Q3I2N0\_Monopterus albus ----- KVVRYTSCSSKTSDDHFPVYGVFQVKLRPGRDNIPLCAGQFDRSGLYLEGI 613  
A0A3P8VEE4\_Cynoglossus semilaevis ----- QVVKYTCSSKTSDDHFPVYGVFQVKLRPGRDNIPLCAGQFDRSGLYLEGI 606  
A0A3Q1H6D9\_Anabas testudineus ----- KVIKYTSCSSKTSDDHFPVYGVFLVKLRPGRDNIPLCAGQFDRSGLYLEGI 616  
A0A4W6CEK3\_Lates calcarifer ----- KVVRYTSCSSKTSDDHFPVYGVFQVKLRPGRDNIPLCAGQFDRSGLYLEGI 616  
A0A3B4VK37\_Seriola dumerili ----- KVVRYTSCSSKTSDDHFPVYGVFQVKLRPGRDNIPLCAGQFDRSGLYLEGI 616  
A0A3Q3GNS7\_Labrus bergylta ----- KVVRYTCCGKTSDDHFPVYGVFQVKLRPGRDNIPLCAGQFDRSGLYLEGI 615  
A0A3Q3RRU7\_9TELE Mastacembelus armatus ----- KVVRYTSCSSKTSDDHFPVYGVFQVKLRPGRDNIPLCAGQFDRSGLYLEGI 610  
A0A4U5UTG8\_Collichthys lucidus ----- KVKRYTSCSNKTSDDHFPVYGVFQVKLRPGRDNIPLCAGQFDRSGLYLEGI 619  
A0A3B4Z199\_Stegastes partitus ----- KVLRYTSCSNKTSDDHFPVYGVFQVKLRPGRDNIPLCAGQFDRSGLYLEGI 619  
A0A3Q1H1R6\_Acanthochromis polyacanthus ----- KVIKYTSCSNKTSDDHFPVYGVFQVKLRPGRDNIPLCAGQFDRSGLYLEGI 624  
A0A3Q1CXU7\_Amphiprion ocellaris ----- KVKRYTSCSNKTSDDHFPVYGVFQVKLRPGRDNIPLCAGQFDRSGLYLEGI 617  
A0A3P8SMU2\_Amphiprion percula ----- KVVRYTSCSNKTSDDHFPVYGVFQVKLRPGRDNIPLCAGQFDRSGLYLEGI 620  
A0A5J5DH05\_Etheostoma spectabile ----- KVVRYTSCSKTSDDHFPVYGVFQVKLRPGRDNIPLCAGQFDRSGLYLEGI 617  
A0A484DDW2\_Perca flavescens ----- KVVRYTSCSKTSDDHFPVYGVFQVKLRPGRDNIPLCAGQFDRSGLYLEGI 617  
A0A4Z2H351\_Liparis tanakae ----- QVVKYTCSSKTSDDHFPVYGVFQVKLRPGRDNIPLCAGQFDRSGLYLEGI 615  
W5UJJ6\_Ictalurus punctatus ----- KVVRYTSCSSKTSDDHFPVYGMFQVKLRPGRDNIPLCAGLFDRAWYLEGI 617  
A0A5N5KDW8\_Pangasianodon hypophthalmus ----- KVVRYTSCSNKTSDDHFPVYGMFQVKLRPGRDNIPLCAGQFDRSGLYLEGI 585  
A0A3P8ZCA3\_Esox lucius ----- KVMKYTSCSTKTSDDHFPVYGMFLVKLRPGRDNIPLCAGQFDRSGLYLEGI 622  
A0A4W5L9K3\_Hucho hucho ----- KVIKYTSCSMKTSDDHFPVYGMFQVKLRPGRDNIPLCAGQFDRSGLYLEGI 623  
A0A1S3NKU9\_Salmo salar ----- KVIKYTSCSMKTSDDHFPVYGMFQVKLRPGRDNIPLCAGQFDRSGLYLEGI 628  
W5L4Z3\_Astyanax mexicanus ----- KVVRYTSCSSKTSDDHFPVYGMFQVKLRPGRDNIPLCAGQFDRSGLYLEGI 616  
A0A3B4C5P1\_Pygocentrus nattereri ----- KVVRYTSCSSKTSDDHFPVYGMFQVKLRPGRDNIPLCAGQFDRSGLYLEGI 618  
H3BEM7\_Latimeria chalumnae ----- HATRYACCTKTSDDHFPVYGVFQVKLRPGRDNIPLCAGHFDREYVLLIGI 665  
A0A1L8F610\_Xenopus laevis ----- RVLYKASSLNTKTSDDHFPVYGLFEIRVRFGRDNIPLAAGQFDREYVLLIGI 602  
K7FPA9\_Pelodiscus sinensis ----- QAVKYS CSSKTSDDHFPVYGLFRVKVRFGRDNIPLAAGQFDREYVLLIGI 630  
A0A452GIT0\_Gopherus agassizii ----- HAVKYS CSSVKTSDHFPVYGLFRVKVRFGRDNIPLAAGQFDREYVLLIGI 631  
G3VXX0\_Sarcophilus harrisii ----- YPVKYSSCPGKTSDDHFPVYGLFRVKVRFGRDNIPLAAGKFDREYVLLIGI 631  
A0A4X2KFU4\_Vombatus ursinus ----- YPVKYSSCPGKTSDDHFPVYGLFRVKVRFGRDNIPLAAGKFDREYVLLIGI 631  
G1N6K2\_Meleagris gallopavo ----- QAVKYS CPVKTSDHFPVAFALFRVKVRFGRDNIPLAAGQFDREYVLLIGI 565  
F1P5J6\_Gallus gallus ----- QAVKYS CPVKTSDHFPVAFALFRVKVRFGRDNIPLAAGQFDREYVLLIGI 633  
U3IH52\_Anas platyrhynchos platyrhynchos ----- HAVKYS CPVKTSDHFPVAFALFRVKVRFGRDNIPLAAGQFDREYVLLIGI 613  
A0A151MFV8\_Alligator mississippiensis ----- HAVKYS CPTKTSDDHFPVYGLFRVKVRFGRDNIPLAAGQFDREYVLLIGI 424  
A0A1U7RBH0\_Alligator sinensis ----- HAVKYS CPTKTSDDHFPVYGLFRVKVRFGRDNIPLAAGQFDREYVLLIGI 592  
U3JGA7\_Ficedula albicollis ----- QAVKYS CPVKTSDHFPVAFALFRVKVRFGRDNIPLAAGLFDREYVLLIGI 628  
A0A3L8SD89\_Chloebia gouldiae ----- QAVKYS CPVKTSDHFPVAFALFRVKVRFGRDNIPLAAGLFDREYVLLIGI 610  
H0Z776-Taeniopygia guttata ----- QAVKYS CPVKTSDHFPVAFALFRVKVRFGRDNIPLAAGLFDREYVLLIGI 568  
A0A218V5X6\_Lonchura striata domestica ----- QAVKYS CPGKTSDDHFPVAFALFRVKVRFGRDNIPLAAGLFDREYVLLIGI 628  
A0A0Q3MLL4\_Amazona aestiva ----- HAVKYS CPVKTSDHFPVAFALFRVKVRFGRDNIPLAAGQFDREYVLLIGI 633  
A0A1V4J6C2\_Patagioenas fasciata monilis ----- HAVKYS CPVKTSDHFPVAFALFRVKVRFGRDNIPLAAGQFDREYVLLIGI 630  
A0A2I0M3Z8\_Columba livia ----- HAVKYS CPVKTSDHFPVAFALFRVKVRFGRDNIPLAAGQFDREYVLLIGI 630  
INP5E\_Drosophila melanogaster ----- GVSTPTQPHOCLLYDQVPSKTSDDHFPVWALFRTLIRAGTDAIPLAAGLFSRDNYLEGM 729

:. \* . . \*\*\* : \* . \* : \* \* \* \* \* \* \* \* \* \* . : \*

|                                            |        |                   |    |   |       |     |
|--------------------------------------------|--------|-------------------|----|---|-------|-----|
| INP5E_Homo_sapiens                         | KR-RIS | EIQRQQA-LQSQNSST  | CS | S | ----- | 644 |
| INP5E_Pan_troglodytes                      | KR-RIS | EIQRQQA-LQSQNSST  | CS | S | ----- | 644 |
| A0A2K5K2A0_Colobus_angolensis_palliatus    | KR-RIS | EIQRQQA-LQSQNSST  | CS | S | ----- | 573 |
| A0A2K6PY13_Rhinopithecus_roxellana         | KR-RIS | EIQRQQA-LQSQNSST  | CS | S | ----- | 645 |
| H2PTZ0_Pongo_abelii                        | KR-RIS | EIQRQQA-LQSQNSST  | CS | S | ----- | 641 |
| A0A2K6U2B2_Saimiri_boliviensis_boliviensis | KR-RIS | EIQRQQA-LQSQNSST  | CS | S | ----- | 629 |
| A0A2K6F2I5_Propithecus_coquereli           | KR-RIS | EIQRQQA-LKNQNSST  | CT | S | ----- | 642 |
| A0A2K6KCW3_Rhinopithecus_bieti             | KR-RIS | EIQRQQA-LQSQNSST  | CS | S | ----- | 537 |
| A0A2K5MDJ3_Cercocebus_atys                 | KR-RIS | EIQRQQA-LQSQNSST  | CS | S | ----- | 643 |
| A0A2K5XR75_Mandrillus_leucophaeus          | KR-RIS | EIQRQQA-LQSQNSST  | CS | S | ----- | 377 |
| A0A0D9RTF7_Chlorocebus_sabaeus             | KR-RIS | EIQRQQA-LQSQNSST  | CS | S | ----- | 644 |
| A0A096NRS4_Papio_anubis                    | KR-RIS | EIQRQQA-LQSQNSST  | CS | S | ----- | 643 |
| A0A2K5U0T2_Macaca_fascicularis             | KR-RIS | EIQRQQA-LQSQNSST  | CS | S | ----- | 644 |
| F7DRP8_Macaca_mulatta                      | KR-RIS | EIQRQQA-LQSQNSST  | CS | S | ----- | 644 |
| A0A2K5PHS4_Cebus_capucinus_imitator        | KR-RIS | EIQRQQA-LQSQNSST  | CS | S | ----- | 638 |
| A0A2K5CN95_Aotus_nancymaae                 | KR-RIS | EIQRQQA-LQSQNSST  | CS | S | ----- | 646 |
| A0A3Q0DNV4_Tarsius_syrichtha               | KR-RIS | EIQRQQA-LQSQNSST  | CT | S | ----- | 373 |
| H0XE73_Otolemur_garnettii                  | KR-RIS | EIQRQQA-LKNQNSST  | CT | S | ----- | 648 |
| I3N2L4_Ictidomys_tridacemlineatus          | KR-RIS | EIQRQQA-MKNQNSST  | CT | S | ----- | 573 |
| F7BT66_Callithrix_jacchus                  | KR-RIS | EIQRQQA-LQSQNSST  | CS | S | ----- | 646 |
| A0A250Y3V1_Castor_canadensis               | KR-RIS | EIQRQQA-LKNQNSST  | CT | S | ----- | 638 |
| A0A1S3G993Dipodomys_ordii                  | KR-RIS | EMQKQQV-LKNQNSST  | CT | S | ----- | 590 |
| H0VEZ3_Cavia_porcellus                     | KR-RIS | EIQRQQA-LKNQNSST  | CT | S | ----- | 646 |
| G5B6B1_Heterocephalus_glaber               | KR-RIS | EIQRQQA-LKNQNSST  | CT | S | ----- | 650 |
| A0A2Y9E841_Trichochus_manatus_latirostris  | KR-RIS | EIQRQQA-LKNQNSST  | CT | S | ----- | 625 |
| L5KA82_Pteropus_alecto                     | KR-RIS | EMQRQRA-LKTQHSST  | CT | S | ----- | 620 |
| A0A5N4EAQ5_Camelus_dromedarius             | KR-RIS | EMQRQVV-LKNQNSST  | CT | S | ----- | 656 |
| A0A3Q2HCU7_Equus_caballus                  | KR-RIS | EIQRQQA-LKNQNSST  | CT | S | ----- | 653 |
| A0A1S2ZM74_Erinaceus_europaeus             | KR-RIS | EIQRQQA-LKSQNSST  | CT | S | ----- | 647 |
| A0A3Q0DCZ7_Mesocricetus_auratus            | KR-RIS | ELQKQQT-MKNQNSST  | CT | S | ----- | 639 |
| G3I6Z4_Cricetulus_griseus                  | KR-RIS | ELQK-QT-MKNQNSST  | CT | S | ----- | 638 |
| INP5E_Rattus_norvegicus                    | KR-RIS | EIQRQQA-LKSQNSST  | CT | S | ----- | 648 |
| INP5E_Mus_musculus                         | KR-RIS | EIQRQQA-LKSQNSST  | CT | S | ----- | 647 |
| A0A2Y9NRK2_Delphinapterus_leucas           | KR-RIS | EIQRQQA-LKSQNSST  | CT | S | ----- | 627 |
| A0A2Y9SXS0_Physeter_macrocephalus          | KR-RIS | EIQRQQA-LKSQNSST  | CT | S | ----- | 612 |
| E1BAU6_Bos_taurus                          | KR-RIS | EIQRQQA-LKSQNSST  | CT | S | ----- | 656 |
| A0A4W2BWU9_Bos_indicus_x_Bos_taurus        | KR-RIS | EIQRQQA-LKSQNSST  | CT | S | ----- | 656 |
| L8IYW6_Bos_mutus                           | KR-RIS | EIQRQQA-LKSQNSST  | CT | S | ----- | 656 |
| A0A452DQV4_Capra_hircus                    | KR-RIS | EIQRQQA-LKSQNSST  | CT | S | ----- | 656 |
| A0A5J5MJZ6_Muntiacus_reevesi               | KR-RIS | EIQRQQA-LKSQNSST  | CT | S | ----- | 656 |
| A0A5N3WU40_Muntiacus_muntjak               | KR-RIS | EIQRQQA-LKSQNSST  | CT | S | ----- | 656 |
| A0A3Q7V225_Ursus_arctos_horribilis         | KR-RIS | EIQRQQA-LKNQNSST  | CT | S | ----- | 642 |
| A0A452Q8J6_Ursus_americanus                | KR-RIS | EIQRQQA-LKNQNSST  | CT | S | ----- | 642 |
| A0A452VEA9_Ursus_maritimus                 | KR-RIS | EIQRQQA-LKNQNSST  | CT | S | ----- | 644 |
| A0A2U3ZR12_Odobenus_rosmarus_divergens     | KR-RIS | EIQRQQA-LKNQNSST  | CT | S | ----- | 612 |
| A0A3Q7N7C7_Callorhinus_ursinus             | KR-RIS | EIQRQQA-LKNQNSST  | CT | S | ----- | 612 |
| A0A2Y9HBQ8_Neomonachus_schauinslandi       | KR-RIS | EIQRQQA-LKNQNSST  | CT | S | ----- | 613 |
| A0A485NC41_Lynx_pardinus                   | KR-RIS | EIQRQQA-LKNQNSST  | CT | S | ----- | 636 |
| A0A3Q7QUW1_Vulpes_vulpes                   | KR-RIS | EIQRQQA-LKNQNSST  | CT | S | ----- | 613 |
| F1PDA7_Canis_lupus_familiaris              | KR-RIS | EIQRQQA-LKNQNSST  | CT | S | ----- | 622 |
| A0A2Y9JFT0_Enhydra_lutris_kenyoni          | KR-RIS | EIQRQQA-LKAQHSST  | CT | S | ----- | 642 |
| M3YJ90_Mustela_putorius_furo               | KR-RIS | EIQRQQA-LKGQHSST  | CT | S | ----- | 642 |
| I3JX61_Oreochromis_niloticus               | RRRRT  | EIKTKEA-MKNQNSST  | CT | S | ----- | 641 |
| A0A3Q4H5I7_Neolamprologus_brichardi        | RRRRT  | EIKTKEA-MKNQNSST  | CT | S | ----- | 641 |
| A0A3B4FRA1_Pundamilia_nyererei             | RRRRT  | EIKTKEA-MKNQNSST  | CT | S | ----- | 641 |
| A0A3P8QQM7_Astatotilapia_calliptera        | RRRRT  | EIKTKEA-MKNQNSST  | CT | S | ----- | 641 |
| W5M6X5_Lepisosteus_oculatus                | RRRRT  | ELQRKEA-LKNQNSST  | CA | S | ----- | 592 |
| A0A3B3RRU9_Paramormyrops_kingsleyae        | RRRRT  | ELKRREA-MKSQNSST  | CA | S | ----- | 641 |
| A0A4W4HDW3_Electrophorus_electricus        | RRRRT  | ELKRREVVMMKNQNSST | CA | S | ----- | 638 |
| A0A3Q3I2N0_Monopterus_albus                | RRRRT  | ELKR-EA-TKNQNSST  | CA | S | ----- | 638 |
| A0A3P8VEE4_Cynoglossus_semilaevis          | RRRRT  | ELKRREA-MKNQNSST  | CA | S | ----- | 632 |
| A0A3Q1H6D9_Anabas_testudineus              | RRRRT  | ELKRREA-MKSQNSST  | CA | S | ----- | 642 |
| A0A4W6CEK3_Lates_calcarifer                | RRRRT  | ELKRREA-MKNQNSST  | CA | S | ----- | 642 |
| A0A3B4VK37_Seriola_dumerili                | RRRRT  | ELKRREA-MKNQNSST  | CA | S | ----- | 642 |
| A0A3Q3GNS7_Labrus_bergylta                 | RRRRT  | ELKRREA-MKNQNSST  | CA | S | ----- | 641 |
| A0A3Q3RRU7_9TELE_Mastacembelus_armatus     | RRRRT  | ELKRREA-MKSQNSST  | CA | S | ----- | 636 |
| A0A4U5UTG8_Collichthys_lucidus             | RRRRT  | ELKRREA-MKNQNSST  | CA | S | ----- | 645 |
| A0A3B4ZI99_Stegastes_partitus              | RRRRT  | ELKRREA-MKNQNSST  | CA | S | ----- | 645 |
| A0A3Q1H1R6_Acanthochromis_polyacanthus     | RRRRT  | ELKRREA-MKNQNSST  | CA | S | ----- | 650 |
| A0A3Q1CXU7_Amphiprion_ocellaris            | RRRRT  | ELKRREA-MKNQNSST  | CA | S | ----- | 643 |
| A0A3P8SMU2_Amphiprion_percula              | RRRRT  | ELKRREA-MKNQNSST  | CA | S | ----- | 646 |
| A0A5J5DH05_Etheostoma_spectabile           | RRRRT  | ELKRREA-MKNQNSST  | CA | S | ----- | 643 |
| A0A484DW2_Perca_flavescens                 | RRRRT  | ELKRREA-MKNQNSST  | CA | S | ----- | 643 |
| A0A4Z2H351_Liparis_tanaka                  | RRRRT  | ELKRREA-MKSQNSST  | CA | S | ----- | 641 |
| W5UJU6_Ictalurus_punctatus                 | RRRRT  | ELKRREA-MKNQNSST  | CA | S | ----- | 643 |
| A0A5N5KDW8_Pangasianodon_hypophthalmus     | RRRRT  | ELKRREA-MKNQNSST  | CA | S | ----- | 611 |
| A0A3P8ZCA3_Esox_lucius                     | RRRRT  | ELKRREA-MKNQNSST  | CA | S | ----- | 648 |
| A0A4W5L9K3_Hucho_hucho                     | RRRRT  | ELKRREA-MKNQNSST  | CA | S | ----- | 649 |

|                                         |        |                  |    |                                   |       |     |
|-----------------------------------------|--------|------------------|----|-----------------------------------|-------|-----|
| A0A1S3NKU9_Salmo_salar                  | FR-RIT | ELKKREA-TKDQGNST | CS | S                                 | ----- | 654 |
| W5L4Z3_Astyanax_mexicanus               | FR-RIT | ELKKREAVMKNQSNST | CS | S                                 | ----- | 643 |
| A0A3B4C5P1_Pygocentrus_nattereri        | FR-RIT | ELKKREAVMKNQSNST | CS | S                                 | ----- | 645 |
| H3BEM7_Latimeria_chalumnae              | FR-RLA | EISRSMS-IKSHRDSL | CT | A                                 | ----- | 691 |
| A0A1L8F610_Xenopus_laevis               | FR-RST | KVQHRQL-EKNQKTSS | CS | S                                 | ----- | 628 |
| K7FPA9_Pelodiscus_sinensis              | FR-RIT | ELQKRQE-LKDQKSSR | CA | S                                 | ----- | 656 |
| A0A452GIT0_Gopherus_agassizii           | FR-RIT | KLQKRQE-LKDQKSSR | CT | S                                 | ----- | 657 |
| G3VXX0_Sarcophilus_harrisii             | FR-RIS | ELQKQQT-LKDQKSSM | CT | S                                 | ----- | 657 |
| A0A4X2KFU4_Vombatus_ursinus             | FR-RIS | ELQKQQA-LKDQKSSM | CT | S                                 | ----- | 657 |
| G1N6K2_Meleagris_gallopavo              | FR-RIT | ELQNRRO-QKDQKSSS | CS | S                                 | ----- | 591 |
| F1P5J6_Gallus_gallus                    | FR-RIT | ELQNRRO-QKDQKSSS | CS | S                                 | ----- | 659 |
| U3IH52_Anas_platyrhynchos_platyrhynchos | FR-RIT | DVQNRV-QKDQKSSS  | CS | S                                 | ----- | 639 |
| A0A151MFV8_Alligator_mississippiensis   | FR-RIT | DLKKRQE-LKDQKSSR | CT | S                                 | ----- | 450 |
| A0A1U7RBH0_Alligator_sinensis           | FR-RIT | DLKKRQE-LKDQKSSR | CT | S                                 | ----- | 618 |
| U3JGA7_Ficedula_albicollis              | FR-RAT | ELLKRRE-QKDQRSSS | CS | S                                 | ----- | 654 |
| A0A3L8SD89_Chloebia_gouldiae            | FR-RAT | ELLKRRE-QKDQRSSS | YY | RKPLGSRPLVPLHAGAQLLELTSSRAGDPRKAC | 668   |     |
| HOZ776_Taeniopygia_guttata              | FR-RAT | ELLKRRE-QKDQRSSS | CS | S                                 | ----- | 594 |
| A0A218V5X6_Lonchura_striata_domestica   | FR-RAT | ELLKRRE-QKDQRSSS | CS | S                                 | ----- | 654 |
| A0A0Q3MLL4_Amazona_aestiva              | FR-RIT | ELQKRQE-LKDQKSSS | CS | S                                 | ----- | 659 |
| A0A1V4J6C2_Patagioenas_fasciata_monilis | FR-RIT | ELQKRQE-LKDQKSSS | CS | S                                 | ----- | 656 |
| A0A2I0M3Z8_Columba_livia                | FR-RIT | ELQKRQE-LKDQKSSS | CS | S                                 | ----- | 656 |
| INP5E_Drosophila_melanogaster           | FR-RLN | QYS-----GASA     | CV | Q                                 | ----- | 747 |

: \* \* . : :

|                                            |       |
|--------------------------------------------|-------|
| INP5E_Homo_sapiens                         | ----- |
| INP5E_Pan_troglodytes                      | ----- |
| A0A2K5K2A0_Colobus_angolensis_palliatus    | ----- |
| A0A2K6PY13_Rhinopithecus_roxellana         | ----- |
| H2PTZ0_Pongo_abelii                        | ----- |
| A0A2K6U2B2_Saimiri_boliviensis_boliviensis | ----- |
| A0A2K6F2I5_Propithecus_coquereli           | ----- |
| A0A2K6KCW3_Rhinopithecus_bieti             | ----- |
| A0A2K5MDJ3_Cercocebus_atys                 | ----- |
| A0A2K5XR75_Mandrillus_leucophaeus          | ----- |
| A0A0D9RTF7_Chlorocebus_sabaeus             | ----- |
| A0A096NRS4_Papio_anubis                    | ----- |
| A0A2K5U0T2_Macaca_fascicularis             | ----- |
| F7DRP8_Macaca_mulatta                      | ----- |
| A0A2K5PHS4_Cebus_capucinus_imitator        | ----- |
| A0A2K5CN95_Aotus_nancymae                  | ----- |
| A0A3Q0DNV4_Tarsius_syrichtha               | ----- |
| H0XE73_Otlemur_garnettii                   | ----- |
| I3N2L4_Ictidomys_tridecemlineatus          | ----- |
| F7BT66_Callithrix_jacchus                  | ----- |
| A0A250Y3V1_Castor_canadensis               | ----- |
| A0A1S3G993Dipodomys_ordii                  | ----- |
| H0VEZ3_Cavia_porcellus                     | ----- |
| G5B6B1_Heterocephalus_glaber               | ----- |
| A0A2Y9E841_Trichechus_manatus_latirostris  | ----- |
| L5KA82_Pteropus_alecto                     | ----- |
| A0A5N4EAQ5_Camelus_dromedarius             | ----- |
| A0A3Q2HCU7_Equus_caballus                  | ----- |
| A0A1S2ZM74_Erinaceus_europaeus             | ----- |
| A0A3Q0DCZ7_Mesocricetus_auratus            | ----- |
| G3I6Z4_Cricetulus_griseus                  | ----- |
| INP5E_Rattus_norvegicus                    | ----- |
| INP5E_Mus_musculus                         | ----- |
| A0A2Y9NRK2_Delphinapterus_leucas           | ----- |
| A0A2Y9SXS0_Physeter_macrocephalus          | ----- |
| E1BAU6_Bos_taurus                          | ----- |
| A0A4W2BWU9_Bos_indicus_x_Bos_taurus        | ----- |
| L8IYW6_Bos_mutus                           | ----- |
| A0A452DQV4_Capra_hircus                    | ----- |
| A0A5J5MJZ6_Muntiacus_reevesi               | ----- |
| A0A5N3WU40_Muntiacus_muntjak               | ----- |
| A0A3Q7V225_Ursus_arctos_horribilis         | ----- |
| A0A452Q8J6_Ursus_americanus                | ----- |
| A0A452VEA9_Ursus_maritimus                 | ----- |
| A0A2U3ZR12_Odobenus_rosmarus_divergens     | ----- |
| A0A3Q7N7C7_Callorhinus_ursinus             | ----- |
| A0A2Y9HBQ8_Neomonachus_schauinslandi       | ----- |
| A0A485NC41_Lynx_pardinus                   | ----- |
| A0A3Q7QUW1_Vulpes_vulpes                   | ----- |
| F1PDA7_Canis_lupus_familiaris              | ----- |
| A0A2Y9JFT0_Enhydra_lutris_kenyoni          | ----- |
| M3YJ90_Mustela_putorius_furo               | ----- |
| I3JX61_Oreochromis_niloticus               | ----- |
| A0A3Q4H5I7_Neolamprologus_brichardi        | ----- |
| A0A3B4FRA1_Pundamilia_nyererei             | ----- |
| A0A3P8QQM7_Astatotilapia_calliptera        | ----- |
| W5M6X5_Lepisosteus_oculatus                | ----- |

|                                         |                             |
|-----------------------------------------|-----------------------------|
| A0A3B3RRU9_Paramormyrops_kingsleyae     | -----                       |
| A0A4W4HDW3_Electrophorus_electricus     | -----                       |
| A0A3Q3I2N0_Monopterus_albus             | -----                       |
| A0A3P8VEE4_Cynoglossus_semilaevis       | -----                       |
| A0A3Q1H6D9_Anabas_testudineus           | -----                       |
| A0A4W6CEK3_Lates_calcarifer             | -----                       |
| A0A3B4VK37_Seriola_dumerili             | -----                       |
| A0A3Q3GNS7_Labrus_bergylta              | -----                       |
| A0A3Q3RRU7_9TELE_Mastacembelus_armatus  | -----                       |
| A0A4U5UTG8_Collichthys_lucidus          | -----                       |
| A0A3B4ZI99_Stegastes_partitus           | -----                       |
| A0A3Q1H1R6_Acanthochromis_polyacanthus  | -----                       |
| A0A3Q1CXU7_Amphiprion_ocellaris         | -----                       |
| A0A3P8SMU2_Amphiprion_percula           | -----                       |
| A0A5J5DH05_Etheostoma_spectabile        | -----                       |
| A0A484DDW2_Perca_flavescens             | -----                       |
| A0A4Z2H351_Liparis_tanakae              | -----                       |
| W5UJJ6_Ictalurus_punctatus              | -----                       |
| A0A5N5KDW8_Pangasianodon_hypophthalmus  | -----                       |
| A0A3P8ZCA3_Esox_lucius                  | -----                       |
| A0A4W5L9K3_Hucho_hucho                  | -----                       |
| A0A1S3NKU9_Salmo_salar                  | -----                       |
| W5L4Z3_Astyanax_mexicanus               | -----                       |
| A0A3B4C5P1_Pygocentrus_nattereri        | -----                       |
| H3BEM7_Latimeria_chalumnae              | -----                       |
| A0A1L8F610_Xenopus_laevis               | -----                       |
| K7FPA9_Pelodiscus_sinensis              | -----                       |
| A0A452GIT0_Gopherus_agassizii           | -----                       |
| G3VXX0_Sarcophilus_harrisii             | -----                       |
| A0A4X2KFU4_Vombatus_ursinus             | -----                       |
| G1N6K2_Meleagris_gallopavo              | -----                       |
| F1P5J6_Gallus_gallus                    | -----                       |
| U3IH52_Anas_platyrhynchos_platyrhynchos | -----                       |
| A0A151MFV8_Alligator_mississippiensis   | -----                       |
| A0A1U7RBH0_Alligator_sinensis           | -----                       |
| U3JGA7_Ficedula_albicollis              | -----                       |
| A0A3L8SD89_Chloeobia_gouldiae           | RKLSHISPVRLTVSSFKALSPSG 692 |
| H0Z776-Taeniopygia_guttata              | -----                       |
| A0A218V5X6_Lonchura_striata_domestica   | -----                       |
| A0A0Q3MLL4_Amazona_aestiva              | -----                       |
| A0A1V4J6C2_Patagioenas_fasciata_monilis | -----                       |
| A0A2I0M3Z8_Columba_livia                | -----                       |
| INP5E_Drosophila_melanogaster           | -----                       |

Figure\_S3

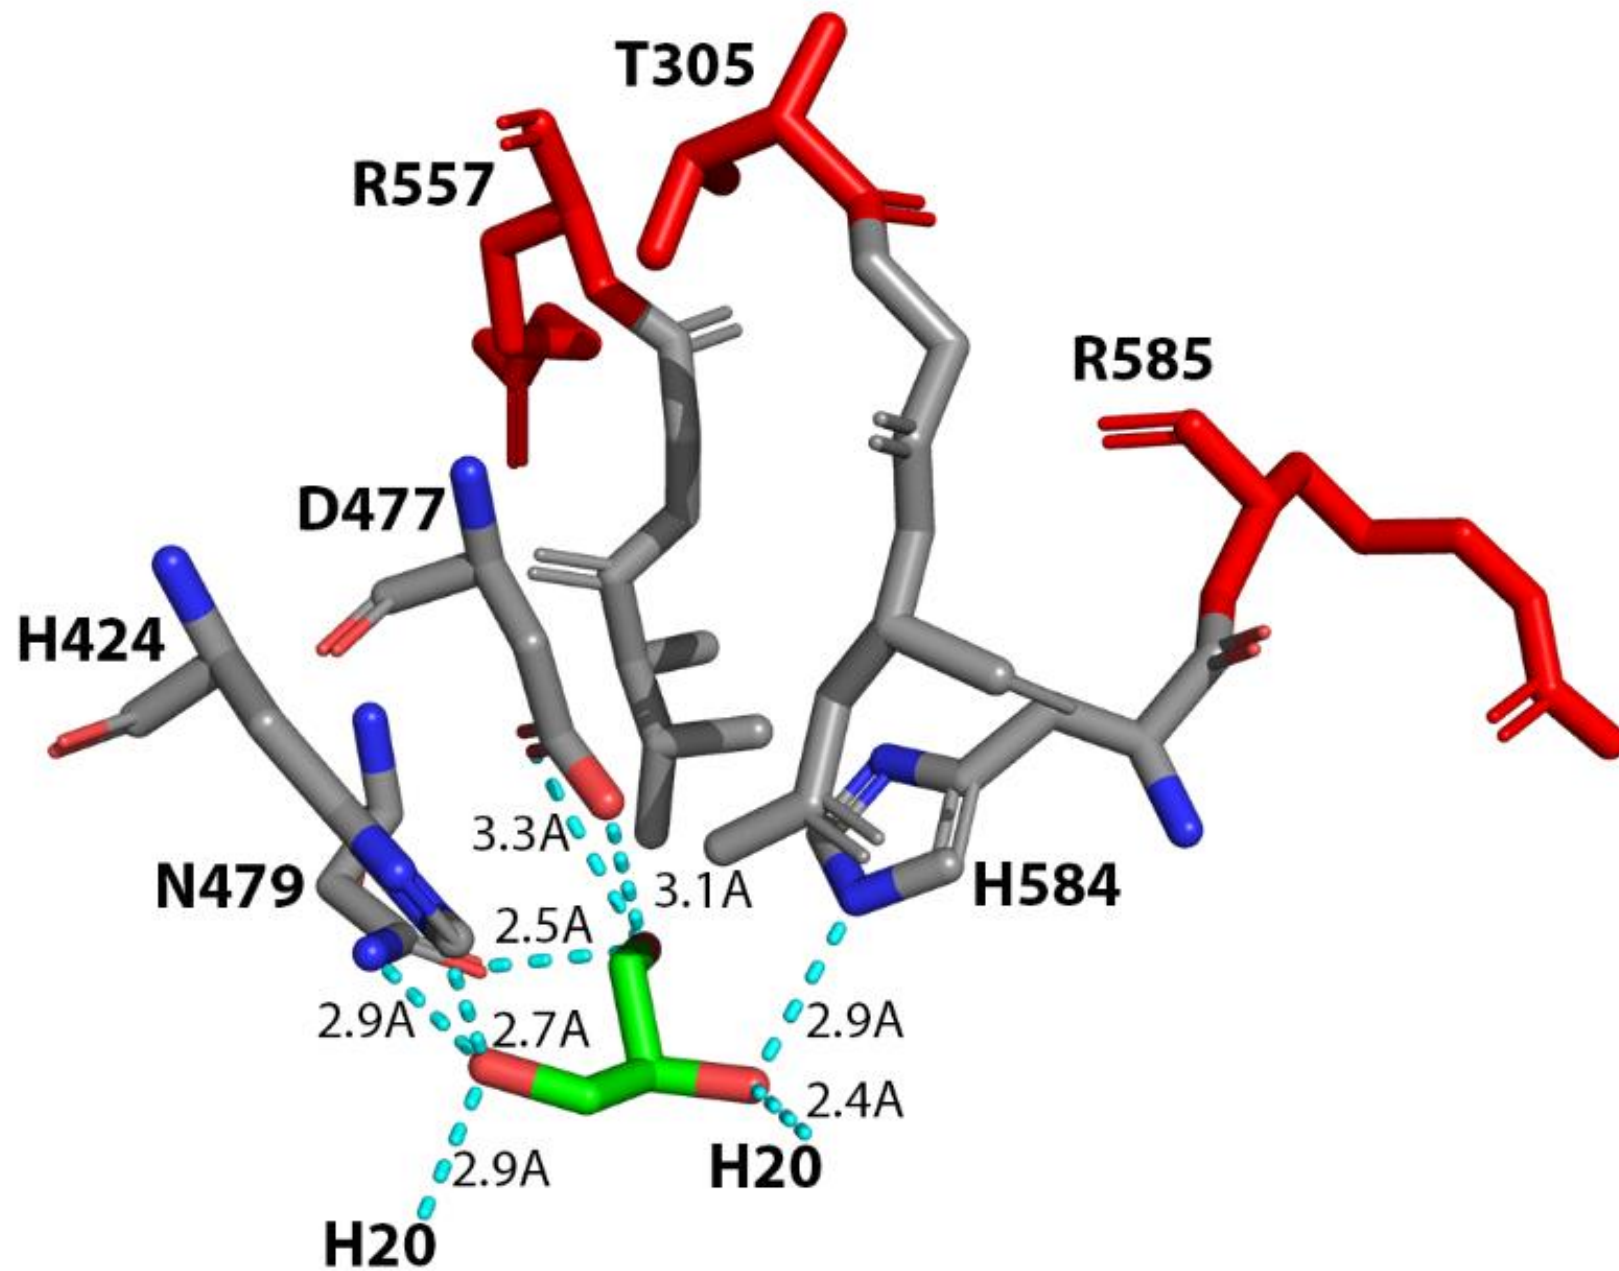

Figure\_S4

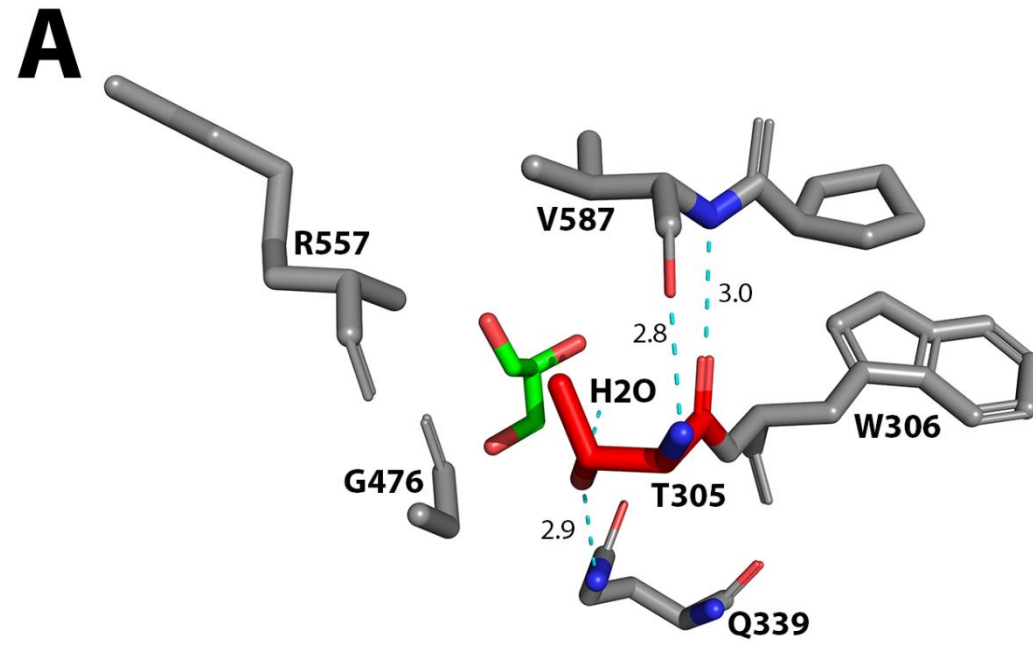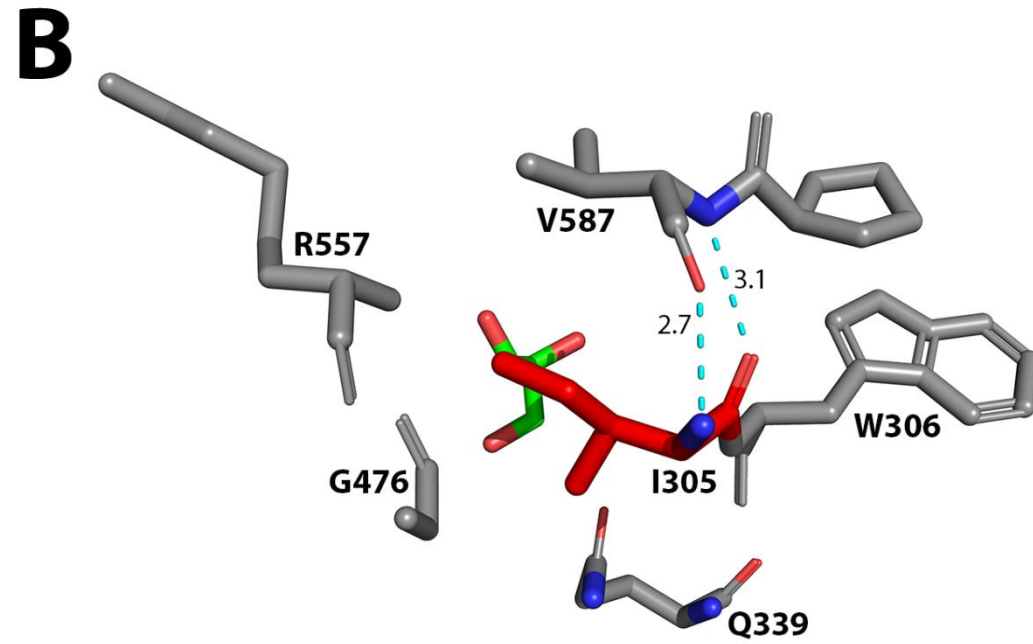



Figure\_S5

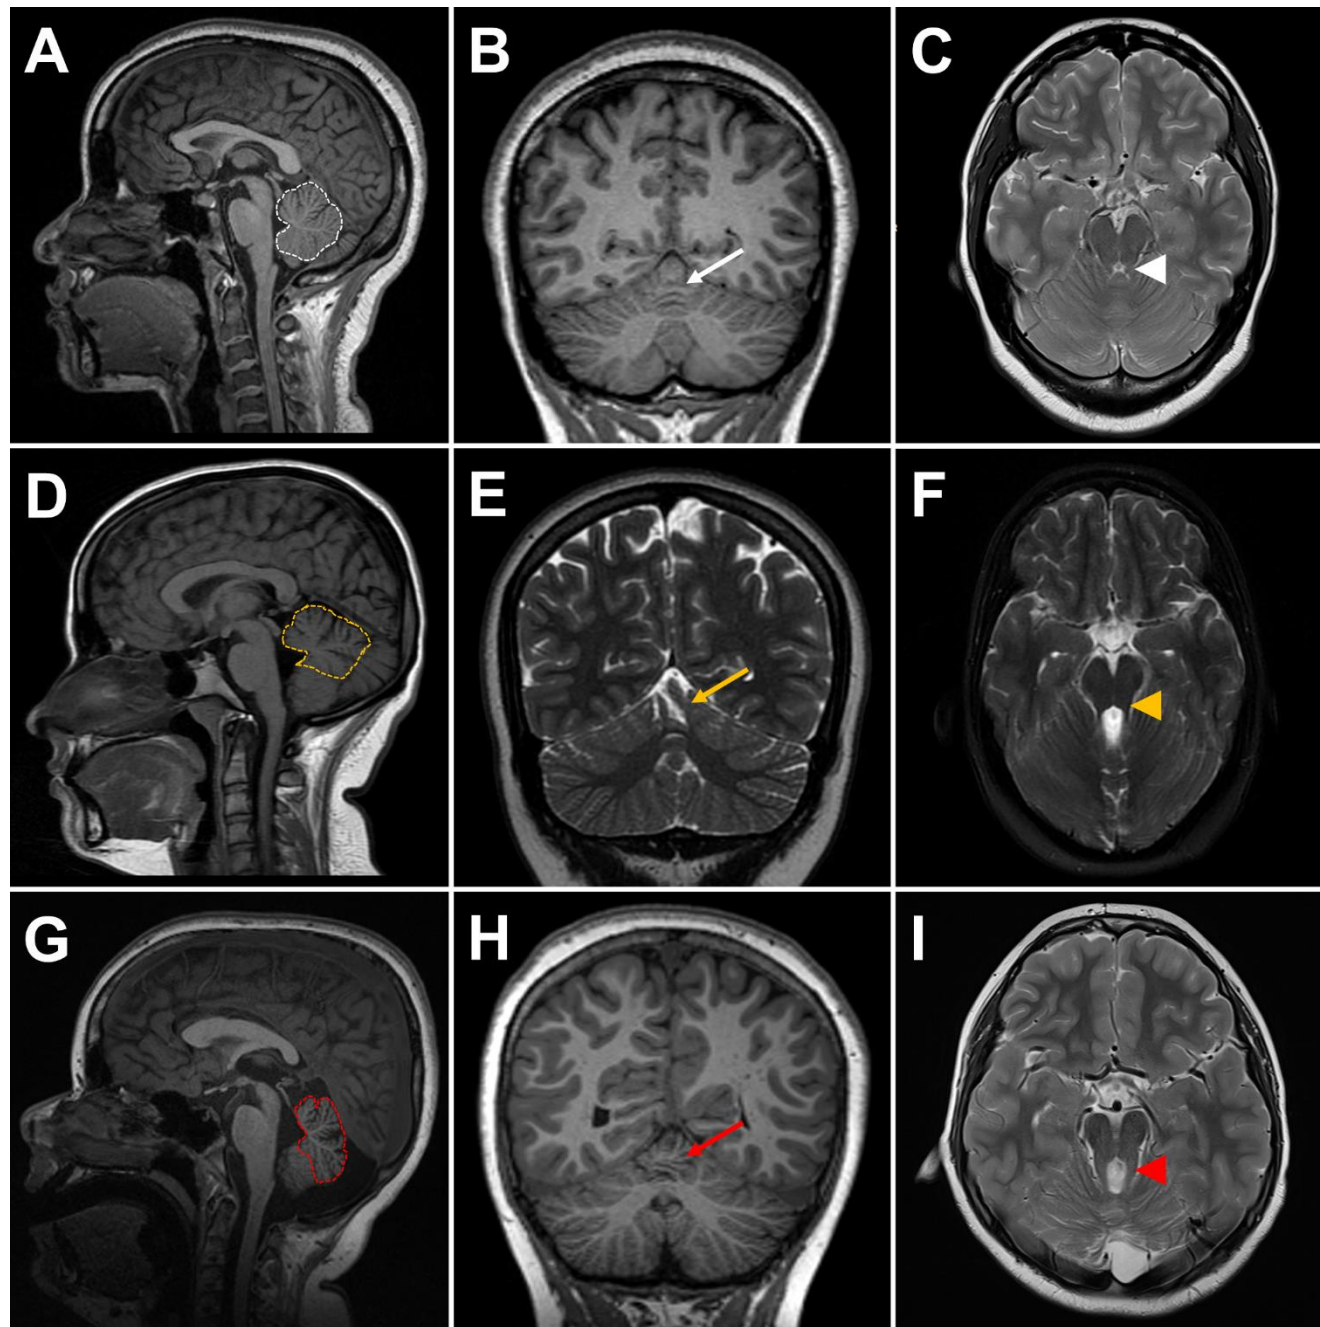

Supplement: Supplementary file [file 2020.08.24.20179085-1.pdf]
